# Supplementary material for: The microalgaPhaeocystis antarcticais tolerant to salinity and metal mixture toxicity interactions
Source: Royal Society of Chemistry journal article supplement (doi:10.1039/d1em00233c), 2021-01-01
Supplement: d1em00233c1.xlsx [file d1em00233c1.xlsx]

## Sheet: Meta
This spreadsheet contains the data from all experiments investigating the multiple stressors salinity and metal exposure to the microalga Phaeocystis antarctica.
Each row reflects an individual flask containing an exposure solution with the pH, salinity, and metal exposure listed
Dissolved metal concentrations are as measured by ICP OES
The prefixes Aqueous_, Inorganic_, and Free_ indicate the output of different metal fractions from WHAM modelling. Note that Aqueous concentrations are equivalent to the dissolved concentrations as measured by ICP OES
Growth rate reflects the microalgal population growth rate over the test duration in doublings per day. This was normalised to the metal-free control growth rate of microaglae at the same salinity to give the % Control column.

## Sheet: All data
Nominal Sal	Treatment	Growth Rate (dblngs/day)	% Control	Dissolved_Cd	Dissolved_Cu	Dissolved_Ni	Dissolved_Pb	Dissolved_Zn	Salinity	Start pH	End pH	Free_Cd	Free_Cu	Free_Ni	Free_Pb	Free_Zn	Aqueous_Cd	Aqueous_Cu	Aqueous_Ni	Aqueous_Pb	Aqueous_Zn	Inorganic_Cd	Inorganic_Cu	Inorganic_Ni	Inorganic_Pb	Inorganic_Zn
15	Cu high	0.27	54	0	4.8	0	0	0	14.9	7.7	7.6	0	0.072274	0	0	0	0	4.8	0	0	0	0	0.851516	0	0	0
15	Cu high	0.35	70	0	5.3	0	0	0	14.9	7.7	7.6	0	0.0858112	0	0	0	0	5.3	0	0	0	0	1.01038	0	0	0
25	Cu high	0.39	61	0	5.1	0	0	0	25	7.8	7.7	0	0.0737566	0	0	0	0	5.1	0	0	0	0	1.27092	0	0	0
25	Cu high	0.48	76	0	5.4	0	0	0	25	7.8	7.7	0	0.0740667	0	0	0	0	5.4	0	0	0	0	1.40437	0	0	0
35	Cu high	0.33	53.6	0	5.5	0	0	0	35	8	7.8	0	0.0635278	0	0	0	0	5.5	0	0	0	0	1.7221	0	0	0
35	Cu high	0.35	56.3	0	6.1	0	0	0	35	8	7.8	0	0.0740127	0	0	0	0	6.1	0	0	0	0	2.00805	0	0	0
55	Cu high	0.18	59.6	0	6.2	0	0	0	55	8.3	8	0	0.0511814	0	0	0	0	6.2	0	0	0	0	2.47829	0	0	0
55	Cu high	0.16	55	0	5.6	0	0	0	55	8.2	8	0	0.0444434	0	0	0	0	5.6	0	0	0	0	2.14785	0	0	0
55	Cu high	0.21	72.6	0	5.5	0	0	0	55	8.3	8	0	0.0433074	0	0	0	0	5.5	0	0	0	0	2.09702	0	0	0
55	Cu high	0.21	71.7	0	5.3	0	0	0	55	8.3	8	0	0.0410434	0	0	0	0	5.3	0	0	0	0	1.98264	0	0	0
15	Cd low	0.48	93.15	18.9	0	0	0	0	15	7.8	7.6	0.549023	0	0	0	0	18.9	0	0	0	0	13.7141	0	0	0	0
15	Cd low	0.38	74.09	18.7	0	0	0	0	15	7.8	7.6	0.542662	0	0	0	0	18.7	0	0	0	0	13.4893	0	0	0	0
15	Cd low	0.55	107.09	18.4	0	0	0	0	15	7.8	7.7	0.533579	0	0	0	0	18.4	0	0	0	0	13.2645	0	0	0	0
25	Cd low	0.55	85.93	20.1	0	0	0	0	25	8	7.8	0.324381	0	0	0	0	20.1	0	0	0	0	14.8383	0	0	0	0
25	Cd low	0.57	90.07	19.4	0	0	0	0	25	8.1	7.8	0.31317	0	0	0	0	19.4	0	0	0	0	14.3886	0	0	0	0
25	Cd low	0.59	93.11	19.8	0	0	0	0	25	8.1	7.8	0.31947	0	0	0	0	19.8	0	0	0	0	14.6134	0	0	0	0
15	Cd high	-0.04	0	2786.8	0	0	0	0	14.9	7.7	7.6	82.0326	0	0	0	0	2786.9	0	0	0	0	2023.4	0	0	0	0
15	Cd high	-0.07	0	2780.4	0	0	0	0	14.9	7.7	7.6	81.8434	0	0	0	0	2780.5	0	0	0	0	2023.4	0	0	0	0
25	Cd high	0.3	47	2488.6	0	0	0	0	25	7.8	7.7	40.234	0	0	0	0	2488.7	0	0	0	0	1843.54	0	0	0	0
25	Cd high	0.36	57	2503.6	0	0	0	0	25	7.9	7.7	40.4753	0	0	0	0	2503.6	0	0	0	0	1854.78	0	0	0	0
35	Cd high	0.17	26.9	2746.1	0	0	0	0	35	7.9	7.8	29.357	0	0	0	0	2746.1	0	0	0	0	2068.36	0	0	0	0
35	Cd high	0.18	28.7	2711.1	0	0	0	0	35	8	7.8	28.9834	0	0	0	0	2711.2	0	0	0	0	2034.64	0	0	0	0
45	Cd low	0.47	93	20.9	0	0	0	0	45	8.2	8	0.161486	0	0	0	0	20.9	0	0	0	0	15.85	0	0	0	0
45	Cd low	0.51	100	21.2	0	0	0	0	45	8.2	8	0.163847	0	0	0	0	21.2	0	0	0	0	16.0748	0	0	0	0
45	Cd low	0.47	93	21	0	0	0	0	45	8.2	8	0.162397	0	0	0	0	21	0	0	0	0	15.9624	0	0	0	0
55	Cd low	0.35	97	20.5	0	0	0	0	55	8.3	8	0.121868	0	0	0	0	20.5	0	0	0	0	15.85	0	0	0	0
55	Cd low	0.25	71	20.5	0	0	0	0	55	8.3	8	0.121709	0	0	0	0	20.5	0	0	0	0	15.85	0	0	0	0
55	Cd low	0.35	98	20.2	0	0	0	0	55	8.3	8	0.120209	0	0	0	0	20.2	0	0	0	0	15.6251	0	0	0	0
55	Cd high	0.15	50.8	2695.5	0	0	0	0	55	8.3	8	16.0507	0	0	0	0	2695.5	0	0	0	0	2079.6	0	0	0	0
55	Cd high	0.16	52.9	2661.6	0	0	0	0	55	8.3	8	15.8492	0	0	0	0	2661.6	0	0	0	0	2057.12	0	0	0	0
55	Cd high	0.16	56.1	3013.4	0	0	0	0	55	8.3	8	17.9444	0	0	0	0	3013.5	0	0	0	0	2326.91	0	0	0	0
55	Cd high	0.16	55.9	3018.2	0	0	0	0	55	8.3	8	17.969	0	0	0	0	3018.2	0	0	0	0	2338.15	0	0	0	0
15	Pb high	-0.03	0	0	0	0	367.3	0	14.9	7.8	7.6	0	0	0	14.1353	0	0	0	0	367.2	0	0	0	0	269.36	0
15	Pb high	0.01	0	0	0	0	357.4	0	14.9	7.8	7.6	0	0	0	13.7434	0	0	0	0	357.4	0	0	0	0	261.072	0
25	Pb high	0.47	75	0	0	0	316.7	0	25	7.8	7.7	0	0	0	7.24879	0	0	0	0	316.7	0	0	0	0	248.64	0
25	Pb high	0.47	74	0	0	0	315.4	0	25	7.8	7.8	0	0	0	7.21711	0	0	0	0	315.3	0	0	0	0	248.64	0
35	Pb low	0.49	80.3	0	0	0	262.2	0	35	8	7.8	0	0	0	3.98713	0	0	0	0	262.2	0	0	0	0	213.416	0
35	Pb low	0.48	77.6	0	0	0	265.3	0	35	8	7.8	0	0	0	4.03555	0	0	0	0	265.3	0	0	0	0	217.56	0
55	Pb low	0.31	104.9	0	0	0	199.4	0	55	8.3	8	0	0	0	1.30935	0	0	0	0	199.4	0	0	0	0	171.562	0
55	Pb low	0.32	109.7	0	0	0	229.4	0	55	8.3	8	0	0	0	1.50752	0	0	0	0	229.4	0	0	0	0	197.462	0
55	Pb low	0.33	110.8	0	0	0	219.1	0	55	8.3	8	0	0	0	1.43946	0	0	0	0	219.1	0	0	0	0	188.552	0
55	Pb low	0.34	114.9	0	0	0	236	0	55	8.3	8	0	0	0	1.82142	0	0	0	0	236	0	0	0	0	201.398	0
15	Zn low	0.44	86.41	0	0	0	0	388	15	7.8	7.6	0	0	0	0	82.2709	0	0	0	0	388.3	0	0	0	0	175.218
15	Zn low	0.38	74.37	0	0	0	0	423	15	7.8	7.6	0	0	0	0	89.6425	0	0	0	0	422.9	0	0	0	0	190.91
15	Zn low	0.41	79.7	0	0	0	0	429	15	7.8	7.6	0	0	0	0	90.9933	0	0	0	0	429.3	0	0	0	0	194.179
25	Zn low	0.46	72.41	0	0	0	0	389	25	8	7.8	0	0	0	0	64.9346	0	0	0	0	389.3	0	0	0	0	174.565
25	Zn low	0.55	86.47	0	0	0	0	392	25	8	7.8	0	0	0	0	65.4166	0	0	0	0	392.2	0	0	0	0	175.872
25	Zn low	0.53	83.83	0	0	0	0	401	25	8.1	7.8	0	0	0	0	66.953	0	0	0	0	401.3	0	0	0	0	180.449
15	Zn high	0.34	66.65	0	0	0	0	876.4	14.9	7.8	7.6	0	0	0	0	186.939	0	0	0	0	876.4	0	0	0	0	397.51
15	Zn high	0.4	78.95	0	0	0	0	875.2	15	7.7	7.6	0	0	0	0	186.161	0	0	0	0	875.2	0	0	0	0	396.857
25	Zn high	0.41	64.49	0	0	0	0	888.8	25	7.8	7.7	0	0	0	0	149.414	0	0	0	0	888.8	0	0	0	0	398.164
25	Zn high	0.42	66.74	0	0	0	0	891	25	7.8	7.7	0	0	0	0	149.793	0	0	0	0	891	0	0	0	0	399.472
35	Zn high	0.33	53.82	0	0	0	0	801.4	35	7.9	7.8	0	0	0	0	113.919	0	0	0	0	801.4	0	0	0	0	359.59
35	Zn high	0.29	46.96	0	0	0	0	791.8	35	7.9	7.8	0	0	0	0	112.548	0	0	0	0	791.8	0	0	0	0	355.667
45	Zn low	0.41	80.9656	0	0	0	0	386	45	8.3	8	0	0	0	0	47.6382	0	0	0	0	386.3	0	0	0	0	175.872
45	Zn low	0.43	84.2467	0	0	0	0	409	45	8.2	8	0	0	0	0	50.4099	0	0	0	0	408.7	0	0	0	0	186.333
45	Zn low	0.37	72.72	0	0	0	0	408	45	8.2	8	0	0	0	0	50.3548	0	0	0	0	408.3	0	0	0	0	185.679
55	Zn low	0.31	86.398	0	0	0	0	412	55	8.3	8	0	0	0	0	45.3973	0	0	0	0	412.4	0	0	0	0	190.256
55	Zn low	0.32	90.1527	0	0	0	0	403	55	8.3	8	0	0	0	0	44.3294	0	0	0	0	402.7	0	0	0	0	185.679
55	Zn low	0.31	86.6343	0	0	0	0	408	55	8.3	8	0	0	0	0	44.8818	0	0	0	0	407.7	0	0	0	0	188.294
55	Zn high	0.08	26.4	0	0	0	0	834.4	55	8.2	8	0	0	0	0	92.8455	0	0	0	0	834.4	0	0	0	0	381.165
55	Zn high	0.23	77.1	0	0	0	0	807	55	8.3	8	0	0	0	0	89.7929	0	0	0	0	807	0	0	0	0	368.743
55	Zn high	0.17	59.3	0	0	0	0	864.5	55	8.3	8	0	0	0	0	96.2001	0	0	0	0	864.5	0	0	0	0	395.549
55	Zn high	0.23	77.6	0	0	0	0	855	55	8.3	8	0	0	0	0	95.1482	0	0	0	0	855	0	0	0	0	390.972
15	Ni high	0.51	101	0	0	1047.9	0	0	14.9	7.9	7.6	0	0	195.542	0	0	0	0	1047.9	0	0	0	0	536.458	0	0
15	Ni high	0.43	85	0	0	1035.1	0	0	14.9	7.8	7.6	0	0	197.4	0	0	0	0	1035.1	0	0	0	0	519.437	0	0
25	Ni high	0.61	96	0	0	1008.7	0	0	25	7.8	7.8	0	0	143.414	0	0	0	0	1008.7	0	0	0	0	517.089	0	0
25	Ni high	0.58	92	0	0	995.1	0	0	25	7.9	7.8	0	0	141.475	0	0	0	0	995.1	0	0	0	0	510.046	0	0
35	Ni high	0.61	99.1	0	0	1003.1	0	0	35	8	7.9	0	0	114.502	0	0	0	0	1003.1	0	0	0	0	532.349	0	0
35	Ni high	0.59	95.8	0	0	979.8	0	0	35	8	7.8	0	0	111.844	0	0	0	0	979.8	0	0	0	0	520.024	0	0
45	Ni high	0.3	58.1602	0	0	1028.9	0	0	45	8.2	8	0	0	92.8518	0	0	0	0	1028.9	0	0	0	0	592.803	0	0
45	Ni high	0.3	59.3437	0	0	1033.9	0	0	45	8.2	8	0	0	93.3072	0	0	0	0	1033.9	0	0	0	0	592.803	0	0
45	Ni high	0.3	58.8066	0	0	1035.3	0	0	45	8.2	8	0	0	93.4299	0	0	0	0	1035.3	0	0	0	0	592.803	0	0
55	Ni high	0.26	88.8	0	0	1021.8	0	0	55	8.3	8	0	0	77.0163	0	0	0	0	1021.8	0	0	0	0	616.281	0	0
55	Ni high	0.34	116	0	0	993.9	0	0	55	8.3	8.1	0	0	74.911	0	0	0	0	993.9	0	0	0	0	598.673	0	0
55	Ni high	0.33	111.6	0	0	1030.3	0	0	55	8.3	8.1	0	0	77.6602	0	0	0	0	1030.3	0	0	0	0	622.15	0	0
55	Ni high	0.28	95	0	0	1035.7	0	0	55	8.3	8.1	0	0	78.0669	0	0	0	0	1035.7	0	0	0	0	622.15	0	0
15	Sum EC10	0.35	68.64	20.7	2.4	428.6	282.9	397.2	15	7.8	7.6	0.604154	0.0405493	81.5868	11.0075	84.6946	20.7	2.4	428.6	282.9	397.2	15.0631	0.479137	215.405	211.344	180.449
15	Sum EC10	0.34	66.82	21.3	2.6	445.6	307.3	429.8	15	7.8	7.6	0.621616	0.0460749	84.8331	11.989	91.6628	21.3	2.6	445.6	307.3	429.8	15.5127	0.543954	223.622	229.992	195.486
15	Sum EC10	0.36	69.54	21.6	2.6	443.8	304.1	431.1	15	7.8	7.6	0.630214	0.0458569	84.4921	11.8596	91.9439	21.6	2.6	443.8	304.1	431.1	15.7375	0.541412	223.035	225.848	196.14
25	Sum EC10	0.47	73.97	22.2	2.6	460.5	267.9	440.3	25	8	7.8	0.359259	0.0316738	63.5867	5.46275	73.7768	22.2	2.6	460.5	267.9	440.3	16.412	0.667233	242.991	217.56	198.755
25	Sum EC10	0.47	73.68	21.9	2.8	450.7	258.4	432.6	25	8.1	7.8	0.353962	0.0347719	62.242	5.26895	72.4835	21.9	2.8	450.8	258.4	432.6	16.1872	0.730779	237.708	211.344	194.832
25	Sum EC10	0.47	73.1	21.6	2.8	452.9	248.6	425.4	25	8	7.8	0.349138	0.0337578	62.5343	5.06654	71.2799	21.6	2.8	452.9	248.5	425.4	15.9624	0.711715	238.882	202.642	191.563
15	Sum EC50	0.23	46	2524.9	5.7	469.3	302.7	867.2	14.9	7.8	7.6	74.3975	0.152012	89.7035	11.9848	185.814	2524.9	5.7	469.3	302.7	867.2	1832.3	1.78564	235.947	227.92	394.895
15	Sum EC50	0.28	56	2585.2	6	477.2	301.7	893.6	14.9	7.7	7.6	76.175	0.163161	91.2166	11.9513	191.488	2585.2	6	477.2	301.7	893.6	1877.26	1.91909	240.056	227.92	407.317
25	Sum EC50	0.3	48	2528.8	5.9	456.7	273.8	862.6	25	7.8	7.7	40.9082	0.111613	65.0364	6.39684	145.441	2528.8	5.9	456.7	273.8	862.6	1866.02	2.11608	234.187	219.632	387.703
25	Sum EC50	0.22	35	2543.7	6	457.5	267.7	866.2	25	7.9	7.7	41.1492	0.113997	65.1503	6.25396	146.048	2543.7	6	457.5	267.7	866.2	1877.26	2.16056	234.774	215.488	389.011
35	Sum EC50	0.24	39.1	2427	5.2	446.3	249.6	785.3	35	7.9	7.8	25.9559	0.0725244	50.9996	3.86014	111.908	2427	5.2	446.3	249.6	785.3	1821.06	1.96357	237.121	207.2	353.052
35	Sum EC50	0.23	37.3	2455.1	6.2	454.4	255.3	817.4	35	7.9	7.8	26.2561	0.0910671	51.937	3.94938	116.493	2455.1	6.2	454.4	255.3	817.4	1843.54	2.46558	241.23	211.344	368.089
45	Sum EC10	0.31	61.4701	23.7	3	480	244.8	423.2	45	8.2	7.9	0.184078	0.0235463	43.3408	2.27348	52.3572	23.7	3	480	244.8	423.2	18.0982	0.984963	275.272	211.344	193.525
45	Sum EC10	0.36	70.113	23.7	3.2	486.6	251.5	422.3	45	8.2	8	0.183734	0.0250014	43.9365	2.33587	52.2421	23.7	3.2	486.6	251.4	422.3	18.0982	1.04215	279.381	215.488	192.871
45	Sum EC10	0.27	52.8187	23.4	3.3	487.3	251.8	418.4	45	8.2	8	0.181792	0.0261881	44.0009	2.33927	51.7559	23.4	3.3	487.3	251.8	418.4	17.8733	1.09299	279.968	217.56	190.91
55	Sum EC10	0.21	58.6631	22.1	2.5	463.9	256.5	433.7	55	8.3	8	0.131811	0.0148744	34.9834	1.70258	47.8646	22.1	2.5	463.9	256.5	433.7	17.0865	0.826098	278.794	223.776	200.717
55	Sum EC10	0.28	78.9526	21.2	2.5	449.5	248.3	415.9	55	8.3	8	0.126265	0.0142751	33.896	1.64761	45.9009	21.2	2.5	449.5	248.3	415.9	16.412	0.794325	270.577	215.488	192.217
55	Sum EC10	0.14	40.7952	21.5	2.8	458.3	250.6	423.1	55	8.3	8	0.12819	0.0166966	34.5579	1.66326	46.6967	21.5	2.8	458.3	250.6	423.1	16.6368	0.927772	275.859	217.56	195.486
55	Sum EC50	0.15	49.5	2761.9	6	461	235.1	742.4	55	8.2	8	16.4501	0.0544887	36.8542	1.83575	82.7652	2762	6	461	235.1	742.4	2135.81	2.6308	266.468	202.849	339.976
55	Sum EC50	0.16	54.4	2814.6	6.4	465.6	242.3	775.1	55	8.2	8	16.7637	0.0598573	37.2218	1.89209	86.4141	2814.6	6.4	465.6	242.3	775.1	2180.77	2.89134	268.816	209.272	355.013
55	Sum EC50	0.18	60.6	3062.3	6.4	480.4	241.5	770.3	55	8.2	8	18.239	0.0595674	38.4088	1.88574	85.8832	3062.3	6.4	480.4	241.5	770.3	2371.87	2.87863	277.62	209.272	353.052
55	Sum EC50	0.16	54.3	3045.2	6	477.4	243.3	772.1	55	8.2	8	18.1376	0.0549414	38.1696	1.89931	86.078	3045.3	6	477.5	243.3	772.1	2360.63	2.65622	275.859	209.272	353.706
15	Sum EC10 -Cu	0.3	59.1	19.6	0	427.6	288.1	411.2	15	7.8	7.6	0.574445	0	81.3614	11.1557	87.5477	19.6	0	427.6	288	411.2	14.2762	0	214.818	213.416	186.333
15	Sum EC10 -Cu	0.25	48	19.8	0	432.6	301.4	404.6	15	7.8	7.6	0.579252	0	82.3157	11.6822	86.1656	19.8	0	432.6	301.4	404.6	14.3886	0	217.166	223.776	183.718
15	Sum EC10 -Cu	0.28	54.42	19.7	0	432.8	305.9	398	15	7.8	7.6	0.577363	0	82.3533	11.8598	84.7599	19.7	0	432.8	305.9	398	14.3886	0	217.166	225.848	180.449
25	Sum EC10 -Cu	0.32	49.9	19.9	0	448.6	263	381.3	25	8	7.8	0.321725	0	61.9116	5.33691	63.7784	19.9	0	448.6	263	381.3	14.7258	0	236.534	213.416	171.296
25	Sum EC10 -Cu	0.39	60.9	19.9	0	452	261.5	392.1	25	8	7.8	0.321334	0	62.3846	5.30606	65.5971	19.9	0	452	261.5	392.1	14.7258	0	238.295	211.344	176.526
25	Sum EC10 -Cu	0.39	61.89	19.8	0	451	265.8	393.6	25	8	7.8	0.319518	0	62.2379	5.394	65.8396	19.8	0	451	265.8	393.6	14.6134	0	237.708	215.488	177.18
45	Sum EC10 -Cu	0.35	68.7478	20.7	0	461.5	231.9	354.3	45	8.2	8	0.16023	0	41.6531	2.14597	43.759	20.7	0	461.5	231.9	354.3	15.7375	0	264.707	198.912	161.489
45	Sum EC10 -Cu	0.37	73.3658	20.8	0	473.3	251.6	388.1	45	8.2	8	0.161278	0	42.7245	2.32905	47.9337	20.8	0	473.4	251.6	388.1	15.85	0	271.75	215.488	177.18
45	Sum EC10 -Cu	0.35	69.6053	20.8	0	467.2	235.3	367.7	45	8.2	8	0.161222	0	42.1684	2.17701	45.4071	20.8	0	467.2	235.3	367.7	15.85	0	268.229	201.813	167.373
55	Sum EC10 -Cu	0.26	72.8834	20	0	448.5	254.2	390	55	8.3	8	0.119002	0	33.8076	1.68218	42.9863	20	0	448.5	254.1	390	15.5127	0	269.403	219.632	179.795
55	Sum EC10 -Cu	0.27	76.7369	20.1	0	450.7	256.5	403.7	55	8.3	8	0.119768	0	33.9772	1.69804	44.4933	20.1	0	450.7	256.5	403.7	15.5127	0	271.164	221.704	186.333
55	Sum EC10 -Cu	0.28	77.9333	20.2	0	451.7	256.9	396.4	55	8.3	8	0.120195	0	34.0477	1.70022	43.6926	20.2	0	451.7	256.9	396.4	15.6251	0	271.75	221.704	183.064
55	Sum EC50 -Cu	0.13	43	2948.5	0	460.3	230.9	717.5	55	8.2	8.1	17.5576	0	34.7036	1.53077	79.1412	2948.6	0	460.3	230.9	717.5	2281.94	0	277.033	200.362	331.477
55	Sum EC50 -Cu	0.18	62	2993.3	0	465.1	235.9	745.3	55	8.2	8	17.8278	0	37.1703	1.8369	82.9908	2993.4	0	465.1	235.9	745.3	2315.67	0	268.816	202.849	340.63
55	Sum EC50 -Cu	0.19	64	2679.1	0	468.6	236.5	717.1	55	8.2	8	15.9561	0	37.4479	1.84113	79.846	2679.1	0	468.6	236.5	717.1	2068.36	0	270.577	203.263	328.208
55	Sum EC50 -Cu	0.18	61.9	2657.7	0	465.2	228.3	708.3	55	8.2	8	15.8285	0	37.1748	1.77726	78.8548	2657.7	0	465.2	228.3	708.3	2057.12	0	268.816	196.218	323.631
15	Sum EC20	0.27	52.57	29.9	3.5	647.7	466.4	615.7	15	7.7	7.6	0.87403	0.0791173	123.401	18.4298	131.531	29.9	3.5	647.7	466.3	615.7	21.8077	0.934126	325.748	352.24	280.48
15	Sum EC20	0.28	54.94	30.2	3.4	650.7	444.9	607.4	15	7.7	7.6	0.882528	0.0757201	123.965	17.5623	129.737	30.2	3.4	650.7	444.9	607.4	21.9201	0.895999	326.922	335.664	276.557
15	Sum EC20	0.3	58.65	30.1	3.8	648.5	473.8	612.1	15	7.8	7.6	0.880158	0.0892707	123.554	18.733	130.759	30.1	3.8	648.5	473.7	612.1	21.9201	1.05486	325.748	358.456	278.519
25	Sum EC20	0.4	62.69	32.4	4.2	684.4	384.9	601.6	25	8	7.8	0.524089	0.0654886	94.5568	7.89328	100.904	32.4	4.2	684.4	384.9	601.6	23.9435	1.37895	360.964	314.944	271.327
25	Sum EC20	0.39	61.88	31.7	4.1	669.5	365.5	587.1	25	8	7.8	0.51313	0.0622135	92.492	7.49038	98.4675	31.7	4.1	669.5	365.5	587.1	23.4939	1.30905	353.334	298.368	264.789
25	Sum EC20	0.39	60.51	32.5	4.5	684.9	377	603.6	25	8	7.8	0.525337	0.0714893	94.629	7.73117	101.242	32.5	4.5	684.9	377	603.6	24.056	1.50604	361.551	308.728	272.635
15	Sum EC70	0.29	57	3854.4	9.1	720.4	476.2	1312.6	14.9	7.8	7.6	113.589	0.299964	137.794	19.1223	281.704	3854.4	9.1	720.4	476.2	1312.6	2810.28	3.52045	362.138	362.6	598.881
15	Sum EC70	0.27	53	3883.3	8.7	726.4	463.2	1311.4	14.9	7.8	7.6	114.441	0.283494	138.94	18.5894	281.43	3883.3	8.7	726.4	463.2	1311.4	2821.52	3.32346	365.073	352.24	598.227
25	Sum EC70	0.33	52	3631.8	8.9	691.9	408.4	1259.3	25	7.8	7.7	58.756	0.197132	98.5808	9.599	212.531	3631.8	8.9	691.9	408.4	1259.3	2686.62	3.73015	355.095	329.448	566.191
25	Sum EC70	0.31	49	3674.2	8.9	699.8	414.2	1267.1	25	7.9	7.7	59.442	0.197374	99.7078	9.7367	213.851	3674.2	8.9	699.8	414.2	1267.1	2720.35	3.7365	359.204	333.592	569.46
35	Sum EC70	0.2	32.1	3538	8.6	677.8	385.8	1234.9	35	7.9	7.8	37.8396	0.14052	77.5035	5.98837	176.111	3538	8.6	677.8	385.8	1234.9	2664.14	3.80005	359.791	321.16	555.73
35	Sum EC70	0.25	40.5	3574.8	8.8	684.9	395.1	1263.9	35	7.9	7.8	38.2338	0.146639	78.3123	6.13478	180.256	3574.9	8.8	684.9	395.1	1263.9	2686.62	3.96527	363.899	329.448	568.806
45	Sum EC20	0.23	46.1184	33.5	4.6	715.7	348.1	610.2	45	8.2	8	0.259835	0.0432466	64.6561	3.24026	75.5276	33.5	4.6	715.7	348.1	610.2	25.6297	1.80471	410.854	300.44	278.519
45	Sum EC20	0.25	48.7268	33.2	4.6	715.7	350.6	603.8	45	8.2	8	0.257169	0.0435819	64.6596	3.26313	74.7391	33.2	4.6	715.8	350.5	603.8	25.2925	1.81742	410.854	302.512	275.904
45	Sum EC20	0.25	49.4466	33.6	4.7	723.7	347	593.6	45	8.2	8	0.26066	0.0447868	65.3815	3.23025	73.4767	33.6	4.7	723.7	347	593.6	25.6297	1.86825	415.549	298.368	271.327
55	Sum EC20	0.49	138.019	32	4.4	679.2	375.3	594.9	55	8.3	8	0.190277	0.0328354	51.2403	2.49556	65.7017	32	4.4	679.2	375.3	594.9	24.7304	1.82377	408.506	327.376	275.25
55	Sum EC20	0.43	121.321	31.9	4.1	679.7	376	596.7	55	8.3	8	0.189772	0.0297682	51.2741	2.49958	65.8919	31.9	4.1	679.7	376	596.7	24.618	1.6522	409.093	327.376	275.904
55	Sum EC20	0.48	134.812	31.6	4.2	677.8	364.7	581.9	55	8.3	8	0.187913	0.030994	51.1355	2.42436	64.2641	31.6	4.2	677.8	364.7	581.9	24.3932	1.7221	407.919	317.016	269.366
55	Sum EC70	0.04	12.6	4231.2	9.4	700.7	383.3	1401.1	55	8.2	8	25.2025	0.0981722	56.0452	2.99928	156.299	4231.3	9.4	700.7	383.3	1401.1	3271.16	4.74053	404.398	331.52	642.032
55	Sum EC70	0.09	31.2	4271.5	9.5	708	392.7	1425.4	55	8.2	8	25.4425	0.100084	56.6334	3.07271	159.009	4271.6	9.5	708	392.7	1425.3	3304.88	4.8295	409.093	339.808	653.146
55	Sum EC70	0.06	20.6	3712	9.2	686.5	377.1	1371.7	55	8.2	8	22.1098	0.0962334	54.9076	2.95042	153.019	3712.1	9.2	686.5	377.1	1371.7	2866.48	4.64521	396.18	325.304	628.302
55	Sum EC70	0.09	28.9	3714.8	9.1	685.5	381.1	1363.8	55	8.2	8	22.1265	0.095028	54.8314	2.98119	152.133	3714.9	9.1	685.5	381.1	1363.8	2877.72	4.58802	395.594	329.448	625.033
35	Cu high	0.27	48	0	5.9	0	0	0	34.4	8	7.8	0	0.0717504	0	0	0	0	5.9	0	0	0	0	1.91909	0	0	0
35	Cu high	0.4	69	0	5.5	0	0	0	34.6	8	7.8	0	0.064428	0	0	0	0	5.5	0	0	0	0	1.72845	0	0	0
35	Cu low	0.35	57.6	0	5.3	0	0	0	35	8	7.9	0	0.0600214	0	0	0	0	5.3	0	0	0	0	1.62678	0	0	0
35	Cu low	0.39	62.8	0	4.8	0	0	0	35	8	7.8	0	0.0521199	0	0	0	0	4.8	0	0	0	0	1.41072	0	0	0
35	Cu high	0.36	55.6	0	4.1	0	0	0	34.6	8	7.9	0	0.0357719	0	0	0	0	4.1	0	0	0	0	1.08028	0	0	0
35	Cu high	0.38	60	0	4.9	0	0	0	34.6	8	7.9	0	0.0534663	0	0	0	0	4.9	0	0	0	0	1.43614	0	0	0
35	Cu low	0.46	89.76	0	2.8	0	0	0	34.6	8	7.9	0	0.020844	0	0	0	0	2.8	0	0	0	0	0.55984	0	0	0
35	Cu low	0.44	85.76	0	2.6	0	0	0	34.6	8	7.9	0	0.0167733	0	0	0	0	2.6	0	0	0	0	0.450541	0	0	0
35	Cu low	0.58	98.5249	0	2.6	0	0	0	35	8	7.9	0	0.0156833	0	0	0	0	2.6	0	0	0	0	0.478501	0	0	0
35	Cu low	0.62	104.19	0	2.3	0	0	0	35	8	7.9	0	0.0121644	0	0	0	0	2.3	0	0	0	0	0.371109	0	0	0
35	Cu high	0.14	25	0	10.8	0	0	0	34.6	8	7.8	0	0.16349	0	0	0	0	10.8	0	0	0	0	4.39103	0	0	0
35	Cu high	0.17	29	0	11	0	0	0	34.6	8	7.8	0	0.166979	0	0	0	0	11	0	0	0	0	4.48635	0	0	0
35	Cu high	0.2	32.3	0	10.3	0	0	0	35	8	7.8	0	0.151993	0	0	0	0	10.3	0	0	0	0	4.11778	0	0	0
35	Cu high	0.15	24.2	0	10	0	0	0	35	8	7.8	0	0.146977	0	0	0	0	10	0	0	0	0	3.98433	0	0	0
35	Cu high	0.22	35.1	0	9.6	0	0	0	34.6	8	7.9	0	0.138746	0	0	0	0	9.6	0	0	0	0	3.73015	0	0	0
35	Cu high	0.17	26.9	0	10.5	0	0	0	34.6	8	7.9	0	0.156709	0	0	0	0	10.5	0	0	0	0	4.2131	0	0	0
35	Cu high	0.3	58.27	0	5.1	0	0	0	34.6	8	7.9	0	0.0573393	0	0	0	0	5.1	0	0	0	0	1.53781	0	0	0
35	Cu high	0.34	65.77	0	5.3	0	0	0	34.6	8	7.9	0	0.0609709	0	0	0	0	5.3	0	0	0	0	1.63949	0	0	0
35	Cu high	0.51	86.8788	0	4.8	0	0	0	35	8	7.9	0	0.0469372	0	0	0	0	4.8	0	0	0	0	1.42979	0	0	0
35	Cu high	0.44	73.9538	0	4.8	0	0	0	35	8	7.9	0	0.0469371	0	0	0	0	4.8	0	0	0	0	1.42979	0	0	0
15	Control	0.51	100	0	0	0	0	0	14.6	7.8	7.6	0	0	0	0	0	0	0	0	0	0	0	0	0	0	0
15	Control	0.49	100	0	0	0	0	0	14.8	7.8	7.6	0	0	0	0	0	0	0	0	0	0	0	0	0	0	0
15	Control	0.54	100	0	0	0	0	0	14.9	7.8	7.6	0	0	0	0	0	0	0	0	0	0	0	0	0	0	0
15	Control	0.48	100	0	0	0	0	0	17.9	8.2	7.6	0	0	0	0	0	0	0	0	0	0	0	0	0	0	0
15	Control	0.53	100	0	0	0	0	0	17.9	8.2	7.6	0	0	0	0	0	0	0	0	0	0	0	0	0	0	0
25	Control	0.65	100	0	0	0	0	0	24.7	8	7.9	0	0	0	0	0	0	0	0	0	0	0	0	0	0	0
25	Control	0.64	100	0	0	0	0	0	25.1	8.1	7.8	0	0	0	0	0	0	0	0	0	0	0	0	0	0	0
25	Control	0.62	100	0	0	0	0	0	24.9	8.1	7.8	0	0	0	0	0	0	0	0	0	0	0	0	0	0	0
25	Control	0.62	100	0	0	0	0	0	25	8	7.8	0	0	0	0	0	0	0	0	0	0	0	0	0	0	0
25	Control	0.65	100	0	0	0	0	0	25	8	7.8	0	0	0	0	0	0	0	0	0	0	0	0	0	0	0
35	Control	0.63	100	0	0	0	0	0	35	8	7.8	0	0	0	0	0	0	0	0	0	0	0	0	0	0	0
35	Control	0.6	100	0	0	0	0	0	35	7.9	7.8	0	0	0	0	0	0	0	0	0	0	0	0	0	0	0
45	Control	0.48	100	0	0	0	0	0	45	8.2	8	0	0	0	0	0	0	0	0	0	0	0	0	0	0	0
45	Control	0.5	100	0	0	0	0	0	45.2	8.2	8	0	0	0	0	0	0	0	0	0	0	0	0	0	0	0
45	Control	0.54	100	0	0	0	0	0	45.3	8.3	8	0	0	0	0	0	0	0	0	0	0	0	0	0	0	0
55	Control	0.36	100	0	0	0	0	0	55.2	8.3	8	0	0	0	0	0	0	0	0	0	0	0	0	0	0	0
55	Control	0.34	100	0	0	0	0	0	55.4	8.3	8	0	0	0	0	0	0	0	0	0	0	0	0	0	0	0
55	Control	0.36	100	0	0	0	0	0	55.3	8.3	8	0	0	0	0	0	0	0	0	0	0	0	0	0	0	0
55	Control	0.3	100	0	0	0	0	0	34.6	8.2	8	0	0	0	0	0	0	0	0	0	0	0	0	0	0	0
55	Control	0.33	100	0	0	0	0	0	34.6	8.2	8.1	0	0	0	0	0	0	0	0	0	0	0	0	0	0	0
55	Control	0.27	100	0	0	0	0	0	34.6	8.2	8	0	0	0	0	0	0	0	0	0	0	0	0	0	0	0
55	Control	0.27	100	0	0	0	0	0	34.6	8.2	8	0	0	0	0	0	0	0	0	0	0	0	0	0	0	0
35	Control	0.59	100	0	0	0	0	0	34.8	8.1	7.8	0	0	0	0	0	0	0	0	0	0	0	0	0	0	0
35	Control	0.56	100	0	0	0	0	0	34.8	8.1	7.9	0	0	0	0	0	0	0	0	0	0	0	0	0	0	0
35	Control	0.6	100	0	0	0	0	0	34.6	8	8	0	0	0	0	0	0	0	0	0	0	0	0	0	0	0
35	Control	0.68	100	0	0	0	0	0	34.6	8	7.9	0	0	0	0	0	0	0	0	0	0	0	0	0	0	0
35	Control	0.53	100	0	0	0	0	0	34.3	8	7.9	0	0	0	0	0	0	0	0	0	0	0	0	0	0	0
35	Control	0.55	100	0	0	0	0	0	34.7	8	7.9	0	0	0	0	0	0	0	0	0	0	0	0	0	0	0
35	Control	0.63	100	0	0	0	0	0	35	8	8	0	0	0	0	0	0	0	0	0	0	0	0	0	0	0
35	Control	0.56	100	0	0	0	0	0	35	8	7.9	0	0	0	0	0	0	0	0	0	0	0	0	0	0	0
