# Supplementary material for: The microalgaPhaeocystis antarcticais tolerant to salinity and metal mixture toxicity interactions
Source: Royal Society of Chemistry journal article supplement (doi:10.1039/d1em00233c), 2021-01-01
Supplement: d1em00233c2.xlsx [file d1em00233c2.xlsx]

## Sheet: Meta
This file contains the input and output data from WHAM (version 7) modelling
The input file contains the data as entered into WHAM, the output file contains the output as received. The individual metals of interest (each with their own tab) have been subsetted from the output file.
Note the different input vs output units

## Sheet: Input
Description	Temperatuire	pH	Colloidal Humic Acid	Colloidal Fulvic Acid	Na	Mg	K	Ca	Ni	Cu	Zn	Sr	Cd	Pb	Cl	NO3	SO4	CO3	F	PO4
					DISSOLVED	DISSOLVED	DISSOLVED	DISSOLVED	DISSOLVED	DISSOLVED	DISSOLVED	DISSOLVED	DISSOLVED	DISSOLVED	DISSOLVED	TOTAL	DISSOLVED	DISSOLVED	DISSOLVED	TOTAL
	deg C		mg/l	mg/l	mg/l	mg/l	mg/l	mg/l	µg/l	µg/l	µg/l	mg/l	µg/l	µg/l	mg/l	mg/l	mg/l	mg/l	mg/l	mg/l
Cu high	4	7.7	0.616	1.14	4591	546	170	175	0	4.8283	0	3	0	0	8239	1.5	1155	51.6531	3	0.15
Cu high	4	7.7	0.616	1.14	4591	546	170	175	0	5.33337	0	3	0	0	8239	1.5	1155	51.6531	3	0.15
Cu high	4	7.7	0.616	1.14	7703	917	285	294	0	5.10751	0	6	0	0	13824	1.5	1937	86.6662	5	0.15
Cu high	4	7.8	0.616	1.14	7703	917	285	294	0	5.37159	0	6	0	0	13824	1.5	1937	86.6662	5	0.15
Cu high	4	7.9	0.616	1.14	10784	1284	399	412	0	5.49431	0	8	0	0	19353	1.5	2712	121.333	7	0.15
Cu high	4	7.9	0.616	1.14	10784	1284	399	412	0	6.09162	0	8	0	0	19353	1.5	2712	121.333	7	0.15
Cu high	4	8.1	0.616	1.14	16946	2017	627	648	0	6.20315	0	12	0	0	30412	1.5	4262	190.666	11	0.15
Cu high	4	8.1	0.616	1.14	16946	2017	627	648	0	5.61309	0	12	0	0	30412	1.5	4262	190.666	11	0.15
Cu high	4	8.1	0.616	1.14	16946	2017	627	648	0	5.51275	0	12	0	0	30412	1.5	4262	190.666	11	0.15
Cu high	4	8.1	0.616	1.14	16946	2017	627	648	0	5.31194	0	12	0	0	30412	1.5	4262	190.666	11	0.15
Cd low	4	7.7	0.616	1.14	4622	550	171	177	0	0	0	3	18.8882	0	8294	1.5	1162	51.9997	3	0.15
Cd low	4	7.7	0.616	1.14	4622	550	171	177	0	0	0	3	18.6698	0	8294	1.5	1162	51.9997	3	0.15
Cd low	4	7.7	0.616	1.14	4622	550	171	177	0	0	0	3	18.358	0	8294	1.5	1162	51.9997	3	0.15
Cd low	4	7.9	0.616	1.14	7703	917	285	294	0	0	0	6	20.1214	0	13824	1.5	1937	86.6662	5	0.15
Cd low	4	8	0.616	1.14	7703	917	285	294	0	0	0	6	19.4311	0	13824	1.5	1937	86.6662	5	0.15
Cd low	4	8	0.616	1.14	7703	917	285	294	0	0	0	6	19.8217	0	13824	1.5	1937	86.6662	5	0.15
Cd high	4	7.7	0.616	1.14	4591	546	170	175	0	0	0	3	2786.85	0	8239	1.5	1155	51.6531	3	0.15
Cd high	4	7.7	0.616	1.14	4591	546	170	175	0	0	0	3	2780.43	0	8239	1.5	1155	51.6531	3	0.15
Cd high	4	7.8	0.616	1.14	7703	917	285	294	0	0	0	6	2488.65	0	13824	1.5	1937	86.6662	5	0.15
Cd high	4	7.8	0.616	1.14	7703	917	285	294	0	0	0	6	2503.56	0	13824	1.5	1937	86.6662	5	0.15
Cd high	4	7.9	0.616	1.14	10784	1284	399	412	0	0	0	8	2746.07	0	19353	1.5	2712	121.333	7	0.15
Cd high	4	7.9	0.616	1.14	10784	1284	399	412	0	0	0	8	2711.13	0	19353	1.5	2712	121.333	7	0.15
Cd low	4	8.1	0.616	1.14	13865	1650	513	530	0	0	0	10	20.8534	0	24882	1.5	3487	155.999	9	0.15
Cd low	4	8.1	0.616	1.14	13865	1650	513	530	0	0	0	10	21.1583	0	24882	1.5	3487	155.999	9	0.15
Cd low	4	8.1	0.616	1.14	13865	1650	513	530	0	0	0	10	20.971	0	24882	1.5	3487	155.999	9	0.15
Cd low	4	8.2	0.616	1.14	16946	2017	627	648	0	0	0	12	20.4854	0	30412	1.5	4262	190.666	11	0.15
Cd low	4	8.2	0.616	1.14	16946	2017	627	648	0	0	0	12	20.4585	0	30412	1.5	4262	190.666	11	0.15
Cd low	4	8.2	0.616	1.14	16946	2017	627	648	0	0	0	12	20.2065	0	30412	1.5	4262	190.666	11	0.15
Cd high	4	8.1	0.616	1.14	16946	2017	627	648	0	0	0	12	2695.46	0	30412	1.5	4262	190.666	11	0.15
Cd high	4	8.1	0.616	1.14	16946	2017	627	648	0	0	0	12	2661.62	0	30412	1.5	4262	190.666	11	0.15
Cd high	4	8.1	0.616	1.14	16946	2017	627	648	0	0	0	12	3013.43	0	30412	1.5	4262	190.666	11	0.15
Cd high	4	8.2	0.616	1.14	16946	2017	627	648	0	0	0	12	3018.15	0	30412	1.5	4262	190.666	11	0.15
Pb high	4	7.7	0.616	1.14	4591	546	170	175	0	0	0	3	0	367.254	8239	1.5	1155	51.6531	3	0.15
Pb high	4	7.7	0.616	1.14	4591	546	170	175	0	0	0	3	0	357.434	8239	1.5	1155	51.6531	3	0.15
Pb high	4	7.8	0.616	1.14	7703	917	285	294	0	0	0	6	0	316.71	13824	1.5	1937	86.6662	5	0.15
Pb high	4	7.8	0.616	1.14	7703	917	285	294	0	0	0	6	0	315.351	13824	1.5	1937	86.6662	5	0.15
Pb low	4	7.9	0.616	1.14	10784	1284	399	412	0	0	0	8	0	262.167	19353	1.5	2712	121.333	7	0.15
Pb low	4	7.9	0.616	1.14	10784	1284	399	412	0	0	0	8	0	265.316	19353	1.5	2712	121.333	7	0.15
Pb low	4	8.2	0.616	1.14	16946	2017	627	648	0	0	0	12	0	199.4	30412	1.5	4262	190.666	11	0.15
Pb low	4	8.2	0.616	1.14	16946	2017	627	648	0	0	0	12	0	229.4	30412	1.5	4262	190.666	11	0.15
Pb low	4	8.2	0.616	1.14	16946	2017	627	648	0	0	0	12	0	219.1	30412	1.5	4262	190.666	11	0.15
Pb low	4	8.1	0.616	1.14	16946	2017	627	648	0	0	0	12	0	236	30412	1.5	4262	190.666	11	0.15
Zn low	4	7.7	0.616	1.14	4622	550	171	177	0	0	388.333	3	0	0	8294	1.5	1162	51.9997	3	0.15
Zn low	4	7.7	0.616	1.14	4622	550	171	177	0	0	422.935	3	0	0	8294	1.5	1162	51.9997	3	0.15
Zn low	4	7.7	0.616	1.14	4622	550	171	177	0	0	429.274	3	0	0	8294	1.5	1162	51.9997	3	0.15
Zn low	4	7.9	0.616	1.14	7703	917	285	294	0	0	389.281	6	0	0	13824	1.5	1937	86.6662	5	0.15
Zn low	4	7.9	0.616	1.14	7703	917	285	294	0	0	392.161	6	0	0	13824	1.5	1937	86.6662	5	0.15
Zn low	4	7.9	0.616	1.14	7703	917	285	294	0	0	401.336	6	0	0	13824	1.5	1937	86.6662	5	0.15
Zn high	4	7.7	0.616	1.14	4591	546	170	175	0	0	876.382	3	0	0	8239	1.5	1155	51.6531	3	0.15
Zn high	4	7.7	0.616	1.14	4622	550	171	177	0	0	875.176	3	0	0	8294	1.5	1162	51.9997	3	0.15
Zn high	4	7.8	0.616	1.14	7703	917	285	294	0	0	888.769	6	0	0	13824	1.5	1937	86.6662	5	0.15
Zn high	4	7.8	0.616	1.14	7703	917	285	294	0	0	891.017	6	0	0	13824	1.5	1937	86.6662	5	0.15
Zn high	4	7.9	0.616	1.14	10784	1284	399	412	0	0	801.381	8	0	0	19353	1.5	2712	121.333	7	0.15
Zn high	4	7.9	0.616	1.14	10784	1284	399	412	0	0	791.757	8	0	0	19353	1.5	2712	121.333	7	0.15
Zn low	4	8.1	0.616	1.14	13865	1650	513	530	0	0	386.298	10	0	0	24882	1.5	3487	155.999	9	0.15
Zn low	4	8.1	0.616	1.14	13865	1650	513	530	0	0	408.716	10	0	0	24882	1.5	3487	155.999	9	0.15
Zn low	4	8.1	0.616	1.14	13865	1650	513	530	0	0	408.271	10	0	0	24882	1.5	3487	155.999	9	0.15
Zn low	4	8.2	0.616	1.14	16946	2017	627	648	0	0	412.381	12	0	0	30412	1.5	4262	190.666	11	0.15
Zn low	4	8.2	0.616	1.14	16946	2017	627	648	0	0	402.7	12	0	0	30412	1.5	4262	190.666	11	0.15
Zn low	4	8.2	0.616	1.14	16946	2017	627	648	0	0	407.707	12	0	0	30412	1.5	4262	190.666	11	0.15
Zn high	4	8.1	0.616	1.14	16946	2017	627	648	0	0	834.361	12	0	0	30412	1.5	4262	190.666	11	0.15
Zn high	4	8.1	0.616	1.14	16946	2017	627	648	0	0	806.977	12	0	0	30412	1.5	4262	190.666	11	0.15
Zn high	4	8.1	0.616	1.14	16946	2017	627	648	0	0	864.452	12	0	0	30412	1.5	4262	190.666	11	0.15
Zn high	4	8.1	0.616	1.14	16946	2017	627	648	0	0	855.016	12	0	0	30412	1.5	4262	190.666	11	0.15
Ni high	4	7.8	0.616	1.14	4591	546	170	175	1047.93	0	0	3	0	0	8239	1.5	1155	51.6531	3	0.15
Ni high	4	7.7	0.616	1.14	4591	546	170	175	1035.07	0	0	3	0	0	8239	1.5	1155	51.6531	3	0.15
Ni high	4	7.8	0.616	1.14	7703	917	285	294	1008.67	0	0	6	0	0	13824	1.5	1937	86.6662	5	0.15
Ni high	4	7.8	0.616	1.14	7703	917	285	294	995.053	0	0	6	0	0	13824	1.5	1937	86.6662	5	0.15
Ni high	4	7.9	0.616	1.14	10784	1284	399	412	1003.08	0	0	8	0	0	19353	1.5	2712	121.333	7	0.15
Ni high	4	7.9	0.616	1.14	10784	1284	399	412	979.827	0	0	8	0	0	19353	1.5	2712	121.333	7	0.15
Ni high	4	8.1	0.616	1.14	13865	1650	513	530	1028.89	0	0	10	0	0	24882	1.5	3487	155.999	9	0.15
Ni high	4	8.1	0.616	1.14	13865	1650	513	530	1033.92	0	0	10	0	0	24882	1.5	3487	155.999	9	0.15
Ni high	4	8.1	0.616	1.14	13865	1650	513	530	1035.29	0	0	10	0	0	24882	1.5	3487	155.999	9	0.15
Ni high	4	8.2	0.616	1.14	16946	2017	627	648	1021.77	0	0	12	0	0	30412	1.5	4262	190.666	11	0.15
Ni high	4	8.2	0.616	1.14	16946	2017	627	648	993.88	0	0	12	0	0	30412	1.5	4262	190.666	11	0.15
Ni high	4	8.2	0.616	1.14	16946	2017	627	648	1030.3	0	0	12	0	0	30412	1.5	4262	190.666	11	0.15
Ni high	4	8.2	0.616	1.14	16946	2017	627	648	1035.69	0	0	12	0	0	30412	1.5	4262	190.666	11	0.15
Sum EC10	4	7.7	0.616	1.14	4622	550	171	177	428.56	2.38962	397.245	3	20.6612	282.917	8294	1.5	1162	51.9997	3	0.15
Sum EC10	4	7.7	0.616	1.14	4622	550	171	177	445.565	2.57056	429.787	3	21.258	307.34	8294	1.5	1162	51.9997	3	0.15
Sum EC10	4	7.7	0.616	1.14	4622	550	171	177	443.773	2.5642	431.112	3	21.552	304.086	8294	1.5	1162	51.9997	3	0.15
Sum EC10	4	7.9	0.616	1.14	7703	917	285	294	460.485	2.62966	440.333	6	22.2148	267.868	13824	1.5	1937	86.6662	5	0.15
Sum EC10	4	7.9	0.616	1.14	7703	917	285	294	450.75	2.82545	432.61	6	21.8873	258.398	13824	1.5	1937	86.6662	5	0.15
Sum EC10	4	7.9	0.616	1.14	7703	917	285	294	452.875	2.77622	425.45	6	21.5891	248.557	13824	1.5	1937	86.6662	5	0.15
Sum EC50	4	7.7	0.616	1.14	4591	546	170	175	469.3	5.7	867.2	3	2524.9	302.7	8239	1.5	1155	51.6531	3	0.15
Sum EC50	4	7.7	0.616	1.14	4591	546	170	175	477.2	6	893.6	3	2585.2	301.7	8239	1.5	1155	51.6531	3	0.15
Sum EC50	4	7.8	0.616	1.14	7703	917	285	294	456.7	5.9	862.6	6	2528.8	273.8	13824	1.5	1937	86.6662	5	0.15
Sum EC50	4	7.8	0.616	1.14	7703	917	285	294	457.5	6	866.2	6	2543.7	267.7	13824	1.5	1937	86.6662	5	0.15
Sum EC50	4	7.9	0.616	1.14	10784	1284	399	412	446.263	5.23935	785.323	8	2427.03	249.646	19353	1.5	2712	121.333	7	0.15
Sum EC50	4	7.9	0.616	1.14	10784	1284	399	412	454.441	6.24411	817.388	8	2455.07	255.287	19353	1.5	2712	121.333	7	0.15
Sum EC10	4	8.1	0.616	1.14	13865	1650	513	530	479.969	3.03483	423.243	10	23.7405	244.774	24882	1.5	3487	155.999	9	0.15
Sum EC10	4	8.1	0.616	1.14	13865	1650	513	530	486.557	3.16622	422.295	10	23.696	251.459	24882	1.5	3487	155.999	9	0.15
Sum EC10	4	8.1	0.616	1.14	13865	1650	513	530	487.267	3.27618	418.357	10	23.4456	251.814	24882	1.5	3487	155.999	9	0.15
Sum EC10	4	8.2	0.616	1.14	16946	2017	627	648	463.921	2.54902	433.694	12	22.1368	256.546	30412	1.5	4262	190.666	11	0.15
Sum EC10	4	8.2	0.616	1.14	16946	2017	627	648	449.516	2.48724	415.922	12	21.2053	248.298	30412	1.5	4262	190.666	11	0.15
Sum EC10	4	8.2	0.616	1.14	16946	2017	627	648	458.278	2.77955	423.095	12	21.5285	250.606	30412	1.5	4262	190.666	11	0.15
Sum EC50	4	8.1	0.616	1.14	16946	2017	627	648	461.008	5.99366	742.393	12	2761.94	235.149	30412	1.5	4262	190.666	11	0.15
Sum EC50	4	8.1	0.616	1.14	16946	2017	627	648	465.593	6.4457	775.074	12	2814.58	242.327	30412	1.5	4262	190.666	11	0.15
Sum EC50	4	8.1	0.616	1.14	16946	2017	627	648	480.436	6.41964	770.309	12	3062.26	241.511	30412	1.5	4262	190.666	11	0.15
Sum EC50	4	8.1	0.616	1.14	16946	2017	627	648	477.447	6.0169	772.083	12	3045.24	243.264	30412	1.5	4262	190.666	11	0.15
Sum EC10 -Cu	4	7.7	0.616	1.14	4622	550	171	177	427.581	0	411.152	3	19.647	288.063	8294	1.5	1162	51.9997	3	0.15
Sum EC10 -Cu	4	7.7	0.616	1.14	4622	550	171	177	432.586	0	404.631	3	19.8113	301.387	8294	1.5	1162	51.9997	3	0.15
Sum EC10 -Cu	4	7.7	0.616	1.14	4622	550	171	177	432.786	0	398.028	3	19.7467	305.912	8294	1.5	1162	51.9997	3	0.15
Sum EC10 -Cu	4	7.9	0.616	1.14	7703	917	285	294	448.603	0	381.284	6	19.8955	263.041	13824	1.5	1937	86.6662	5	0.15
Sum EC10 -Cu	4	7.9	0.616	1.14	7703	917	285	294	452.022	0	392.139	6	19.8713	261.488	13824	1.5	1937	86.6662	5	0.15
Sum EC10 -Cu	4	7.9	0.616	1.14	7703	917	285	294	450.957	0	393.579	6	19.759	265.782	13824	1.5	1937	86.6662	5	0.15
Sum EC10 -Cu	4	8.1	0.616	1.14	13865	1650	513	530	461.511	0	354.335	10	20.6659	231.947	24882	1.5	3487	155.999	9	0.15
Sum EC10 -Cu	4	8.1	0.616	1.14	13865	1650	513	530	473.35	0	388.073	10	20.8011	251.607	24882	1.5	3487	155.999	9	0.15
Sum EC10 -Cu	4	8.1	0.616	1.14	13865	1650	513	530	467.209	0	367.659	10	20.7938	235.263	24882	1.5	3487	155.999	9	0.15
Sum EC10 -Cu	4	8.2	0.616	1.14	16946	2017	627	648	448.5	0	390.029	12	19.9862	254.162	30412	1.5	4262	190.666	11	0.15
Sum EC10 -Cu	4	8.2	0.616	1.14	16946	2017	627	648	450.742	0	403.685	12	20.1149	256.532	30412	1.5	4262	190.666	11	0.15
Sum EC10 -Cu	4	8.2	0.616	1.14	16946	2017	627	648	451.681	0	396.427	12	20.1866	256.872	30412	1.5	4262	190.666	11	0.15
Sum EC50 -Cu	4	8.2	0.616	1.14	16946	2017	627	648	460.255	0	717.523	12	2948.53	230.91	30412	1.5	4262	190.666	11	0.15
Sum EC50 -Cu	4	8.1	0.616	1.14	16946	2017	627	648	465.117	0	745.346	12	2993.33	235.937	30412	1.5	4262	190.666	11	0.15
Sum EC50 -Cu	4	8.1	0.616	1.14	16946	2017	627	648	468.599	0	717.132	12	2679.07	236.506	30412	1.5	4262	190.666	11	0.15
Sum EC50 -Cu	4	8.1	0.616	1.14	16946	2017	627	648	465.188	0	708.253	12	2657.66	228.322	30412	1.5	4262	190.666	11	0.15
Sum EC20	4	7.7	0.616	1.14	4622	550	171	177	647.73	3.48774	615.749	3	29.8875	466.353	8294	1.5	1162	51.9997	3	0.15
Sum EC20	4	7.7	0.616	1.14	4622	550	171	177	650.715	3.39338	607.421	3	30.1782	444.904	8294	1.5	1162	51.9997	3	0.15
Sum EC20	4	7.7	0.616	1.14	4622	550	171	177	648.517	3.81944	612.079	3	30.0968	473.751	8294	1.5	1162	51.9997	3	0.15
Sum EC20	4	7.9	0.616	1.14	7703	917	285	294	684.402	4.23413	601.595	6	32.4057	384.926	13824	1.5	1937	86.6662	5	0.15
Sum EC20	4	7.9	0.616	1.14	7703	917	285	294	669.483	4.0937	587.125	6	31.7282	365.487	13824	1.5	1937	86.6662	5	0.15
Sum EC20	4	7.9	0.616	1.14	7703	917	285	294	684.915	4.52966	603.59	6	32.4828	377.007	13824	1.5	1937	86.6662	5	0.15
Sum EC70	4	7.7	0.616	1.14	4591	546	170	175	720.4	9.1	1312.6	3	3854.4	476.2	8239	1.5	1155	51.6531	3	0.15
Sum EC70	4	7.7	0.616	1.14	4591	546	170	175	726.4	8.7	1311.4	3	3883.3	463.2	8239	1.5	1155	51.6531	3	0.15
Sum EC70	4	7.8	0.616	1.14	7703	917	285	294	691.9	8.9	1259.3	6	3631.8	408.4	13824	1.5	1937	86.6662	5	0.15
Sum EC70	4	7.8	0.616	1.14	7703	917	285	294	699.8	8.9	1267.1	6	3674.2	414.2	13824	1.5	1937	86.6662	5	0.15
Sum EC70	4	7.9	0.616	1.14	10784	1284	399	412	677.841	8.55053	1234.86	8	3537.99	385.771	19353	1.5	2712	121.333	7	0.15
Sum EC70	4	7.9	0.616	1.14	10784	1284	399	412	684.894	8.84295	1263.87	8	3574.84	395.117	19353	1.5	2712	121.333	7	0.15
Sum EC20	4	8.1	0.616	1.14	13865	1650	513	530	715.703	4.58334	610.158	10	33.5102	348.101	24882	1.5	3487	155.999	9	0.15
Sum EC20	4	8.1	0.616	1.14	13865	1650	513	530	715.747	4.61265	603.788	10	33.1665	350.558	24882	1.5	3487	155.999	9	0.15
Sum EC20	4	8.1	0.616	1.14	13865	1650	513	530	723.729	4.71515	593.585	10	33.6166	347.026	24882	1.5	3487	155.999	9	0.15
Sum EC20	4	8.2	0.616	1.14	16946	2017	627	648	679.214	4.42933	594.937	12	31.9551	375.342	30412	1.5	4262	190.666	11	0.15
Sum EC20	4	8.2	0.616	1.14	16946	2017	627	648	679.669	4.10637	596.682	12	31.8704	375.975	30412	1.5	4262	190.666	11	0.15
Sum EC20	4	8.2	0.616	1.14	16946	2017	627	648	677.838	4.2446	581.94	12	31.5581	364.676	30412	1.5	4262	190.666	11	0.15
Sum EC70	4	8.1	0.616	1.14	16946	2017	627	648	700.694	9.38161	1401.09	12	4231.23	383.341	30412	1.5	4262	190.666	11	0.15
Sum EC70	4	8.1	0.616	1.14	16946	2017	627	648	708.036	9.52707	1425.35	12	4271.52	392.695	30412	1.5	4262	190.666	11	0.15
Sum EC70	4	8.1	0.616	1.14	16946	2017	627	648	686.491	9.23727	1371.73	12	3712.04	377.135	30412	1.5	4262	190.666	11	0.15
Sum EC70	4	8.1	0.616	1.14	16946	2017	627	648	685.54	9.14035	1363.8	12	3714.85	381.07	30412	1.5	4262	190.666	11	0.15
Cu high	4	7.9	0.616	1.14	10599	1262	392	405	0	5.93758	0	8	0	0	19021	1.5	2666	119.253	7	0.15
Cu high	4	7.9	0.616	1.14	10661	1269	395	407	0	5.53121	0	8	0	0	19132	1.5	2681	119.946	7	0.15
Cu low	4	7.9	0.616	1.14	10784	1284	399	412	0	5.29171	0	8	0	0	19353	1.5	2712	121.333	7	0.15
Cu low	4	7.9	0.616	1.14	10784	1284	399	412	0	4.82903	0	8	0	0	19353	1.5	2712	121.333	7	0.15
Cu high	4	8	0.616	1.14	10661	1269	395	407	0	4.05316	0	8	0	0	19132	1.5	2681	119.946	7	0.15
Cu high	4	7.9	0.616	1.14	10661	1269	395	407	0	4.89667	0	8	0	0	19132	1.5	2681	119.946	7	0.15
Cu low	4	7.9	0.616	1.14	10661	1269	395	407	0	2.84887	0	8	0	0	19132	1.5	2681	119.946	7	0.15
Cu low	4	7.9	0.616	1.14	10661	1269	395	407	0	2.55425	0	8	0	0	19132	1.5	2681	119.946	7	0.15
Cu low	4	8	0.616	1.14	10784	1284	399	412	0	2.6	0	8	0	0	19353	1.5	2712	121.333	7	0.15
Cu low	4	8	0.616	1.14	10784	1284	399	412	0	2.3	0	8	0	0	19353	1.5	2712	121.333	7	0.15
Cu high	4	7.9	0.616	1.14	10661	1269	395	407	0	10.8195	0	8	0	0	19132	1.5	2681	119.946	7	0.15
Cu high	4	7.9	0.616	1.14	10661	1269	395	407	0	10.9964	0	8	0	0	19132	1.5	2681	119.946	7	0.15
Cu high	4	7.9	0.616	1.14	10784	1284	399	412	0	10.274	0	8	0	0	19353	1.5	2712	121.333	7	0.15
Cu high	4	7.9	0.616	1.14	10784	1284	399	412	0	10.0149	0	8	0	0	19353	1.5	2712	121.333	7	0.15
Cu high	4	7.9	0.616	1.14	10661	1269	395	407	0	9.55071	0	8	0	0	19132	1.5	2681	119.946	7	0.15
Cu high	4	7.9	0.616	1.14	10661	1269	395	407	0	10.4743	0	8	0	0	19132	1.5	2681	119.946	7	0.15
Cu high	4	7.9	0.616	1.14	10661	1269	395	407	0	5.12275	0	8	0	0	19132	1.5	2681	119.946	7	0.15
Cu high	4	7.9	0.616	1.14	10661	1269	395	407	0	5.33281	0	8	0	0	19132	1.5	2681	119.946	7	0.15
Cu high	4	8	0.616	1.14	10784	1284	399	412	0	4.8	0	8	0	0	19353	1.5	2712	121.333	7	0.15
Cu high	4	8	0.616	1.14	10784	1284	399	412	0	4.8	0	8	0	0	19353	1.5	2712	121.333	7	0.15
Control	4	7.7	0.616	1.14	4498	535	166	172	0	0	0	3	0	0	8073	1.5	1131	50.6131	3	0.15
Control	4	7.7	0.616	1.14	4560	543	169	174	0	0	0	3	0	0	8184	1.5	1147	51.3064	3	0.15
Control	4	7.7	0.616	1.14	4591	546	170	175	0	0	0	3	0	0	8239	1.5	1155	51.6531	3	0.15
Control	4	7.9	0.616	1.14	5515	657	204	211	0	0	0	4	0	0	9898	1.5	1387	62.053	3	0.15
Control	4	7.9	0.616	1.14	5515	657	204	211	0	0	0	4	0	0	9898	1.5	1387	62.053	3	0.15
Control	4	7.9	0.616	1.14	7610	906	282	291	0	0	0	6	0	0	13658	1.5	1914	85.6262	5	0.15
Control	4	7.9	0.616	1.14	7734	921	286	296	0	0	0	6	0	0	13879	1.5	1945	87.0129	5	0.15
Control	4	7.9	0.616	1.14	7672	913	284	293	0	0	0	6	0	0	13768	1.5	1930	86.3196	5	0.15
Control	4	7.9	0.616	1.14	7703	917	285	294	0	0	0	6	0	0	13824	1.5	1937	86.6662	5	0.15
Control	4	7.9	0.616	1.14	7703	917	285	294	0	0	0	6	0	0	13824	1.5	1937	86.6662	5	0.15
Control	4	7.9	0.616	1.14	10784	1284	399	412	0	0	0	8	0	0	19353	1.5	2712	121.333	7	0.15
Control	4	7.9	0.616	1.14	10784	1284	399	412	0	0	0	8	0	0	19353	1.5	2712	121.333	7	0.15
Control	4	8.1	0.616	1.14	13865	1650	513	530	0	0	0	10	0	0	24882	1.5	3487	155.999	9	0.15
Control	4	8.1	0.616	1.14	13927	1658	515	532	0	0	0	10	0	0	24993	1.5	3503	156.693	9	0.15
Control	4	8.1	0.616	1.14	13957	1661	517	533	0	0	0	10	0	0	25048	1.5	3511	157.039	9	0.15
Control	4	8.2	0.616	1.14	17008	2025	629	650	0	0	0	12	0	0	30522	1.5	4278	191.359	11	0.15
Control	4	8.2	0.616	1.14	17069	2032	632	652	0	0	0	13	0	0	30633	1.5	4293	192.052	11	0.15
Control	4	8.2	0.616	1.14	17038	2028	631	651	0	0	0	12	0	0	30578	1.5	4286	191.706	11	0.15
Control	4	8.1	0.616	1.14	10661	1269	395	407	0	0	0	8	0	0	19132	1.5	2681	119.946	7	0.15
Control	4	8.1	0.616	1.14	10661	1269	395	407	0	0	0	8	0	0	19132	1.5	2681	119.946	7	0.15
Control	4	8.1	0.616	1.14	10661	1269	395	407	0	0	0	8	0	0	19132	1.5	2681	119.946	7	0.15
Control	4	8.1	0.616	1.14	10661	1269	395	407	0	0	0	8	0	0	19132	1.5	2681	119.946	7	0.15
Control	4	7.9	0.616	1.14	10722	1276	397	410	0	0	0	8	0	0	19242	1.5	2697	120.639	7	0.15
Control	4	8	0.616	1.14	10722	1276	397	410	0	0	0	8	0	0	19242	1.5	2697	120.639	7	0.15
Control	4	8	0.616	1.14	10661	1269	395	407	0	0	0	8	0	0	19132	1.5	2681	119.946	7	0.15
Control	4	8	0.616	1.14	10661	1269	395	407	0	0	0	8	0	0	19132	1.5	2681	119.946	7	0.15
Control	4	8	0.616	1.14	10568	1258	391	404	0	0	0	8	0	0	18966	1.5	2658	118.906	7	0.15
Control	4	7.9	0.616	1.14	10691	1273	396	409	0	0	0	8	0	0	19187	1.5	2689	120.293	7	0.15
Control	4	8	0.616	1.14	10784	1284	399	412	0	0	0	8	0	0	19353	1.5	2712	121.333	7	0.15
Control	4	8	0.616	1.14	10784	1284	399	412	0	0	0	8	0	0	19353	1.5	2712	121.333	7	0.15

## Sheet: Output
Description	pH	Ionic strength (M)	Total (M): Ni	Total (M): Cu	Total (M): Zn	Total (M): Cd	Total (M): Pb	Free ion activity (M): Ni	Free ion activity (M): Cu	Free ion activity (M): Zn	Free ion activity (M): Cd	Free ion activity (M): Pb	Total true solution concentration (M): Ni	Total true solution concentration (M): Cu	Total true solution concentration (M): Zn	Total true solution concentration (M): Cd	Total true solution concentration (M): Pb	Total aqueous concentration (M): Ni	Total aqueous concentration (M): Cu	Total aqueous concentration (M): Zn	Total aqueous concentration (M): Cd	Total aqueous concentration (M): Pb	Activity (M): Ni[2+]	Activity (M): NiHCO3[+]	Activity (M): NiOH[+]	Activity (M): Ni(OH)2[0]	Activity (M): NiCl[+]	Activity (M): NiSO4[0]	Activity (M): NiCO3[0]	Activity (M): Cu[2+]	Activity (M): CuOH[+]	Activity (M): Cu(OH)2[0]	Activity (M): CuSO4[0]	Activity (M): CuHCO3[+]	Activity (M): CuCl[+]	Activity (M): CuCO3[0]	Activity (M): Cu(CO3)2[2-]	Activity (M): Zn[2+]	Activity (M): ZnOH[+]	Activity (M): Zn(OH)2[0]	Activity (M): ZnSO4[0]	Activity (M): ZnCO3[0]	Activity (M): ZnCl[+]	Activity (M): ZnHCO3[+]	Activity (M): Cd[2+]	Activity (M): CdOH[+]	Activity (M): Cd(OH)2[0]	Activity (M): CdSO4[0]	Activity (M): CdCl[+]
Cu high	7.7	0.28499	0	7.59743e-08	0	0	0	0	1.13735e-09	0	0	0	0	1.94729e-08	0	0	0	0	7.59743e-08	0	0	0	-	-	-	-	-	-	-	1.13735e-09	3.1285e-10	5.68562e-12	5.64311e-10	6.56975e-09	3.64385e-10	4.4417e-09	4.56251e-12	-	-	-	-	-	-	-	-	-	-	-	-
Cu high	7.7	0.28499	0	8.3923e-08	0	0	0	0	1.35038e-09	0	0	0	0	2.31201e-08	0	0	0	0	8.3923e-08	0	0	0	-	-	-	-	-	-	-	1.35038e-09	3.71447e-10	6.75054e-12	6.70007e-10	7.80024e-09	4.32634e-10	5.27361e-09	5.41704e-12	-	-	-	-	-	-	-	-	-	-	-	-
Cu high	7.7	0.47499	0	8.03742e-08	0	0	0	0	1.16068e-09	0	0	0	0	2.98423e-08	0	0	0	0	8.03742e-08	0	0	0	-	-	-	-	-	-	-	1.16068e-09	3.19268e-10	5.80227e-12	7.92198e-10	1.02478e-08	5.82681e-10	6.92835e-09	1.08779e-11	-	-	-	-	-	-	-	-	-	-	-	-
Cu high	7.8	0.47499	0	8.453e-08	0	0	0	0	1.16556e-09	0	0	0	0	3.20688e-08	0	0	0	0	8.453e-08	0	0	0	-	-	-	-	-	-	-	1.16556e-09	4.03625e-10	9.23464e-12	7.95543e-10	1.0348e-08	5.8513e-10	8.80758e-09	1.75056e-11	-	-	-	-	-	-	-	-	-	-	-	-
Cu high	7.9	0.66168	0	8.64618e-08	0	0	0	0	9.99714e-10	0	0	0	0	3.87982e-08	0	0	0	0	8.64618e-08	0	0	0	-	-	-	-	-	-	-	9.99714e-10	4.35831e-10	1.25534e-11	8.3764e-10	1.16319e-08	6.70797e-10	1.24638e-08	4.08719e-11	-	-	-	-	-	-	-	-	-	-	-	-
Cu high	7.9	0.66168	0	9.58615e-08	0	0	0	0	1.16471e-09	0	0	0	0	4.52015e-08	0	0	0	0	9.58615e-08	0	0	0	-	-	-	-	-	-	-	1.16471e-09	5.07762e-10	1.46252e-11	9.75887e-10	1.35516e-08	7.81508e-10	1.45208e-08	4.76174e-11	-	-	-	-	-	-	-	-	-	-	-	-
Cu high	8.1	1.0319	0	9.76166e-08	0	0	0	0	8.05423e-10	0	0	0	0	5.37718e-08	0	0	0	0	9.76166e-08	0	0	0	-	-	-	-	-	-	-	8.05423e-10	5.56501e-10	2.54043e-11	8.85822e-10	1.32425e-08	7.97169e-10	2.24889e-08	1.65163e-10	-	-	-	-	-	-	-	-	-	-	-	-
Cu high	8.1	1.0319	0	8.83311e-08	0	0	0	0	6.99389e-10	0	0	0	0	4.66929e-08	0	0	0	0	8.83311e-08	0	0	0	-	-	-	-	-	-	-	6.99389e-10	4.83238e-10	2.20599e-11	7.69204e-10	1.14991e-08	6.92223e-10	1.95283e-08	1.4342e-10	-	-	-	-	-	-	-	-	-	-	-	-
Cu high	8.1	1.0319	0	8.67521e-08	0	0	0	0	6.81513e-10	0	0	0	0	4.54994e-08	0	0	0	0	8.67521e-08	0	0	0	-	-	-	-	-	-	-	6.81513e-10	4.70887e-10	2.1496e-11	7.49544e-10	1.12052e-08	6.74529e-10	1.90292e-08	1.39755e-10	-	-	-	-	-	-	-	-	-	-	-	-
Cu high	8.1	1.0319	0	8.3592e-08	0	0	0	0	6.45885e-10	0	0	0	0	4.31208e-08	0	0	0	0	8.3592e-08	0	0	0	-	-	-	-	-	-	-	6.45885e-10	4.4627e-10	2.03723e-11	7.10359e-10	1.06194e-08	6.39267e-10	1.80344e-08	1.32449e-10	-	-	-	-	-	-	-	-	-	-	-	-
Cd low	7.7	0.28692	0	0	0	1.68029e-07	0	0	0	0	4.88407e-09	0	0	0	0	1.66936e-07	0	0	0	0	1.68029e-07	0	-	-	-	-	-	-	-	-	-	-	-	-	-	-	-	-	-	-	-	-	-	-	4.88407e-09	3.70019e-12	1.80995e-15	2.98313e-09	7.06514e-08
Cd low	7.7	0.28692	0	0	0	1.66087e-07	0	0	0	0	4.82748e-09	0	0	0	0	1.65002e-07	0	0	0	0	1.66087e-07	0	-	-	-	-	-	-	-	-	-	-	-	-	-	-	-	-	-	-	-	-	-	-	4.82748e-09	3.65732e-12	1.78898e-15	2.94856e-09	6.98327e-08
Cd low	7.7	0.28692	0	0	0	1.63313e-07	0	0	0	0	4.74668e-09	0	0	0	0	1.6224e-07	0	0	0	0	1.63313e-07	0	-	-	-	-	-	-	-	-	-	-	-	-	-	-	-	-	-	-	-	-	-	-	4.74668e-09	3.59611e-12	1.75904e-15	2.89921e-09	6.8664e-08
Cd low	7.9	0.47499	0	0	0	1.79e-07	0	0	0	0	2.88567e-09	0	0	0	0	1.78388e-07	0	0	0	0	1.79e-07	0	-	-	-	-	-	-	-	-	-	-	-	-	-	-	-	-	-	-	-	-	-	-	2.88567e-09	3.46488e-12	2.68615e-15	2.41703e-09	6.5032e-08
Cd low	8	0.47499	0	0	0	1.7286e-07	0	0	0	0	2.78594e-09	0	0	0	0	1.72254e-07	0	0	0	0	1.7286e-07	0	-	-	-	-	-	-	-	-	-	-	-	-	-	-	-	-	-	-	-	-	-	-	2.78594e-09	4.21128e-12	4.11014e-15	2.33355e-09	6.27845e-08
Cd low	8	0.47499	0	0	0	1.76334e-07	0	0	0	0	2.84198e-09	0	0	0	0	1.75718e-07	0	0	0	0	1.76334e-07	0	-	-	-	-	-	-	-	-	-	-	-	-	-	-	-	-	-	-	-	-	-	-	2.84198e-09	4.29599e-12	4.19281e-15	2.38049e-09	6.40474e-08
Cd high	7.7	0.28499	0	0	0	2.47918e-05	0	0	0	0	7.29756e-07	0	0	0	0	2.47555e-05	0	0	0	0	2.47918e-05	0	-	-	-	-	-	-	-	-	-	-	-	-	-	-	-	-	-	-	-	-	-	-	7.29756e-07	5.52866e-10	2.70434e-13	4.44308e-07	1.04943e-05
Cd high	7.7	0.28499	0	0	0	2.47347e-05	0	0	0	0	7.28073e-07	0	0	0	0	2.46985e-05	0	0	0	0	2.47347e-05	0	-	-	-	-	-	-	-	-	-	-	-	-	-	-	-	-	-	-	-	-	-	-	7.28073e-07	5.51591e-10	2.69811e-13	4.43284e-07	1.04701e-05
Cd high	7.8	0.47499	0	0	0	2.2139e-05	0	0	0	0	3.57919e-07	0	0	0	0	2.21208e-05	0	0	0	0	2.2139e-05	0	-	-	-	-	-	-	-	-	-	-	-	-	-	-	-	-	-	-	-	-	-	-	3.57919e-07	3.41371e-10	2.10218e-13	2.99782e-07	8.06556e-06
Cd high	7.8	0.47499	0	0	0	2.22717e-05	0	0	0	0	3.60065e-07	0	0	0	0	2.22535e-05	0	0	0	0	2.22717e-05	0	-	-	-	-	-	-	-	-	-	-	-	-	-	-	-	-	-	-	-	-	-	-	3.60065e-07	3.43418e-10	2.11478e-13	3.01579e-07	8.11392e-06
Cd high	7.9	0.66168	0	0	0	2.44291e-05	0	0	0	0	2.61158e-07	0	0	0	0	2.44164e-05	0	0	0	0	2.44291e-05	0	-	-	-	-	-	-	-	-	-	-	-	-	-	-	-	-	-	-	-	-	-	-	2.61158e-07	3.13578e-10	2.43102e-13	2.68522e-07	7.86605e-06
Cd high	7.9	0.66168	0	0	0	2.41182e-05	0	0	0	0	2.57834e-07	0	0	0	0	2.41057e-05	0	0	0	0	2.41182e-05	0	-	-	-	-	-	-	-	-	-	-	-	-	-	-	-	-	-	-	-	-	-	-	2.57834e-07	3.09587e-10	2.40008e-13	2.65104e-07	7.76595e-06
Cd low	8.1	0.8472	0	0	0	1.85512e-07	0	0	0	0	1.43657e-09	0	0	0	0	1.85255e-07	0	0	0	0	1.85512e-07	0	-	-	-	-	-	-	-	-	-	-	-	-	-	-	-	-	-	-	-	-	-	-	1.43657e-09	2.73381e-12	3.359e-15	1.71944e-09	5.37147e-08
Cd low	8.1	0.8472	0	0	0	1.88224e-07	0	0	0	0	1.45757e-09	0	0	0	0	1.87963e-07	0	0	0	0	1.88224e-07	0	-	-	-	-	-	-	-	-	-	-	-	-	-	-	-	-	-	-	-	-	-	-	1.45757e-09	2.77378e-12	3.40812e-15	1.74459e-09	5.45001e-08
Cd low	8.1	0.8472	0	0	0	1.86558e-07	0	0	0	0	1.44467e-09	0	0	0	0	1.86299e-07	0	0	0	0	1.86558e-07	0	-	-	-	-	-	-	-	-	-	-	-	-	-	-	-	-	-	-	-	-	-	-	1.44467e-09	2.74923e-12	3.37795e-15	1.72914e-09	5.40176e-08
Cd low	8.2	1.03188	0	0	0	1.82238e-07	0	0	0	0	1.08413e-09	0	0	0	0	1.82058e-07	0	0	0	0	1.82238e-07	0	-	-	-	-	-	-	-	-	-	-	-	-	-	-	-	-	-	-	-	-	-	-	1.08413e-09	2.59731e-12	4.0176e-15	1.46328e-09	4.81696e-08
Cd low	8.2	1.03188	0	0	0	1.81999e-07	0	0	0	0	1.08271e-09	0	0	0	0	1.8182e-07	0	0	0	0	1.81999e-07	0	-	-	-	-	-	-	-	-	-	-	-	-	-	-	-	-	-	-	-	-	-	-	1.08271e-09	2.59391e-12	4.01233e-15	1.46136e-09	4.81065e-08
Cd low	8.2	1.03188	0	0	0	1.79757e-07	0	0	0	0	1.06937e-09	0	0	0	0	1.7958e-07	0	0	0	0	1.79757e-07	0	-	-	-	-	-	-	-	-	-	-	-	-	-	-	-	-	-	-	-	-	-	-	1.06937e-09	2.56196e-12	3.96291e-15	1.44336e-09	4.75139e-08
Cd high	8.1	1.03189	0	0	0	2.39788e-05	0	0	0	0	1.42786e-07	0	0	0	0	2.39721e-05	0	0	0	0	2.39788e-05	0	-	-	-	-	-	-	-	-	-	-	-	-	-	-	-	-	-	-	-	-	-	-	1.42786e-07	2.71723e-10	3.33864e-13	1.9271e-07	6.34392e-06
Cd high	8.1	1.03189	0	0	0	2.36778e-05	0	0	0	0	1.40993e-07	0	0	0	0	2.36711e-05	0	0	0	0	2.36778e-05	0	-	-	-	-	-	-	-	-	-	-	-	-	-	-	-	-	-	-	-	-	-	-	1.40993e-07	2.68311e-10	3.29671e-13	1.9029e-07	6.26426e-06
Cd high	8.1	1.03189	0	0	0	2.68075e-05	0	0	0	0	1.59632e-07	0	0	0	0	2.68002e-05	0	0	0	0	2.68075e-05	0	-	-	-	-	-	-	-	-	-	-	-	-	-	-	-	-	-	-	-	-	-	-	1.59632e-07	3.03781e-10	3.73253e-13	2.15446e-07	7.09235e-06
Cd high	8.2	1.03187	0	0	0	2.68495e-05	0	0	0	0	1.59851e-07	0	0	0	0	2.6842e-05	0	0	0	0	2.68495e-05	0	-	-	-	-	-	-	-	-	-	-	-	-	-	-	-	-	-	-	-	-	-	-	1.59851e-07	3.82963e-10	5.92379e-13	2.15754e-07	7.10211e-06
Pb high	7.7	0.28499	0	0	0	0	1.77237e-06	0	0	0	0	6.82207e-08	0	0	0	0	1.58198e-06	0	0	0	0	1.77237e-06	-	-	-	-	-	-	-	-	-	-	-	-	-	-	-	-	-	-	-	-	-	-	-	-	-	-	-
Pb high	7.7	0.28499	0	0	0	0	1.72499e-06	0	0	0	0	6.63292e-08	0	0	0	0	1.53813e-06	0	0	0	0	1.72499e-06	-	-	-	-	-	-	-	-	-	-	-	-	-	-	-	-	-	-	-	-	-	-	-	-	-	-	-
Pb high	7.8	0.47499	0	0	0	0	1.52845e-06	0	0	0	0	3.49845e-08	0	0	0	0	1.4275e-06	0	0	0	0	1.52845e-06	-	-	-	-	-	-	-	-	-	-	-	-	-	-	-	-	-	-	-	-	-	-	-	-	-	-	-
Pb high	7.8	0.47499	0	0	0	0	1.52189e-06	0	0	0	0	3.48316e-08	0	0	0	0	1.42127e-06	0	0	0	0	1.52189e-06	-	-	-	-	-	-	-	-	-	-	-	-	-	-	-	-	-	-	-	-	-	-	-	-	-	-	-
Pb low	7.9	0.66168	0	0	0	0	1.26522e-06	0	0	0	0	1.92429e-08	0	0	0	0	1.20638e-06	0	0	0	0	1.26522e-06	-	-	-	-	-	-	-	-	-	-	-	-	-	-	-	-	-	-	-	-	-	-	-	-	-	-	-
Pb low	7.9	0.66168	0	0	0	0	1.28042e-06	0	0	0	0	1.94766e-08	0	0	0	0	1.22104e-06	0	0	0	0	1.28042e-06	-	-	-	-	-	-	-	-	-	-	-	-	-	-	-	-	-	-	-	-	-	-	-	-	-	-	-
Pb low	8.2	1.03188	0	0	0	0	9.62309e-07	0	0	0	0	6.31924e-09	0	0	0	0	9.37283e-07	0	0	0	0	9.62309e-07	-	-	-	-	-	-	-	-	-	-	-	-	-	-	-	-	-	-	-	-	-	-	-	-	-	-	-
Pb low	8.2	1.03188	0	0	0	0	1.10709e-06	0	0	0	0	7.27566e-09	0	0	0	0	1.07911e-06	0	0	0	0	1.10709e-06	-	-	-	-	-	-	-	-	-	-	-	-	-	-	-	-	-	-	-	-	-	-	-	-	-	-	-
Pb low	8.2	1.03188	0	0	0	0	1.05738e-06	0	0	0	0	6.94721e-09	0	0	0	0	1.03041e-06	0	0	0	0	1.05738e-06	-	-	-	-	-	-	-	-	-	-	-	-	-	-	-	-	-	-	-	-	-	-	-	-	-	-	-
Pb low	8.1	1.0319	0	0	0	0	1.13894e-06	0	0	0	0	8.79066e-09	0	0	0	0	1.10898e-06	0	0	0	0	1.13894e-06	-	-	-	-	-	-	-	-	-	-	-	-	-	-	-	-	-	-	-	-	-	-	-	-	-	-	-
Zn low	7.7	0.28693	0	0	5.93963e-06	0	0	0	0	1.25835e-06	0	0	0	0	5.83238e-06	0	0	0	0	5.93963e-06	0	0	-	-	-	-	-	-	-	-	-	-	-	-	-	-	-	1.25835e-06	1.25673e-08	1.31427e-09	7.0806e-07	5.05402e-08	4.21334e-07	2.31013e-07	-	-	-	-	-
Zn low	7.7	0.28693	0	0	6.46888e-06	0	0	0	0	1.3711e-06	0	0	0	0	6.35497e-06	0	0	0	0	6.46888e-06	0	0	-	-	-	-	-	-	-	-	-	-	-	-	-	-	-	1.3711e-06	1.36934e-08	1.43203e-09	7.71501e-07	5.50666e-08	4.59087e-07	2.51703e-07	-	-	-	-	-
Zn low	7.7	0.28693	0	0	6.56584e-06	0	0	0	0	1.39176e-06	0	0	0	0	6.45072e-06	0	0	0	0	6.56584e-06	0	0	-	-	-	-	-	-	-	-	-	-	-	-	-	-	-	1.39176e-06	1.38997e-08	1.45361e-09	7.83125e-07	5.58959e-08	4.66005e-07	2.55493e-07	-	-	-	-	-
Zn low	7.9	0.475	0	0	5.95413e-06	0	0	0	0	9.93188e-07	0	0	0	0	5.87765e-06	0	0	0	0	5.95413e-06	0	0	-	-	-	-	-	-	-	-	-	-	-	-	-	-	-	9.93188e-07	1.57208e-08	2.60565e-09	7.66402e-07	9.69777e-08	5.18084e-07	2.79687e-07	-	-	-	-	-
Zn low	7.9	0.475	0	0	5.99818e-06	0	0	0	0	1.00056e-06	0	0	0	0	5.92129e-06	0	0	0	0	5.99818e-06	0	0	-	-	-	-	-	-	-	-	-	-	-	-	-	-	-	1.00056e-06	1.58375e-08	2.625e-09	7.72093e-07	9.76976e-08	5.21931e-07	2.81763e-07	-	-	-	-	-
Zn low	7.9	0.475	0	0	6.13851e-06	0	0	0	0	1.02406e-06	0	0	0	0	6.06035e-06	0	0	0	0	6.13851e-06	0	0	-	-	-	-	-	-	-	-	-	-	-	-	-	-	-	1.02406e-06	1.62095e-08	2.68665e-09	7.90226e-07	9.99912e-08	5.34189e-07	2.88378e-07	-	-	-	-	-
Zn high	7.7	0.28501	0	0	1.34044e-05	0	0	0	0	2.85927e-06	0	0	0	0	1.3214e-05	0	0	0	0	1.34044e-05	0	0	-	-	-	-	-	-	-	-	-	-	-	-	-	-	-	2.85927e-06	2.8556e-08	2.98634e-09	1.60369e-06	1.14147e-07	9.51849e-07	5.21753e-07	-	-	-	-	-
Zn high	7.7	0.28694	0	0	1.3386e-05	0	0	0	0	2.84737e-06	0	0	0	0	1.31969e-05	0	0	0	0	1.3386e-05	0	0	-	-	-	-	-	-	-	-	-	-	-	-	-	-	-	2.84737e-06	2.84371e-08	2.97391e-09	1.60205e-06	1.14295e-07	9.5338e-07	5.22431e-07	-	-	-	-	-
Zn high	7.8	0.47501	0	0	1.35939e-05	0	0	0	0	2.28531e-06	0	0	0	0	1.34597e-05	0	0	0	0	1.35939e-05	0	0	-	-	-	-	-	-	-	-	-	-	-	-	-	-	-	2.28531e-06	2.87334e-08	3.78293e-09	1.76334e-06	1.76568e-07	1.19209e-06	6.41078e-07	-	-	-	-	-
Zn high	7.8	0.47501	0	0	1.36283e-05	0	0	0	0	2.29111e-06	0	0	0	0	1.34939e-05	0	0	0	0	1.36283e-05	0	0	-	-	-	-	-	-	-	-	-	-	-	-	-	-	-	2.29111e-06	2.88063e-08	3.79254e-09	1.76782e-06	1.77015e-07	1.19512e-06	6.42704e-07	-	-	-	-	-
Zn high	7.9	0.6617	0	0	1.22573e-05	0	0	0	0	1.74241e-06	0	0	0	0	1.2159e-05	0	0	0	0	1.22573e-05	0	0	-	-	-	-	-	-	-	-	-	-	-	-	-	-	-	1.74241e-06	2.75799e-08	4.57125e-09	1.65048e-06	2.22154e-07	1.21483e-06	6.40699e-07	-	-	-	-	-
Zn high	7.9	0.6617	0	0	1.21101e-05	0	0	0	0	1.72144e-06	0	0	0	0	1.20127e-05	0	0	0	0	1.21101e-05	0	0	-	-	-	-	-	-	-	-	-	-	-	-	-	-	-	1.72144e-06	2.72479e-08	4.51622e-09	1.63061e-06	2.19481e-07	1.20021e-06	6.32991e-07	-	-	-	-	-
Zn low	8.1	0.84721	0	0	5.9085e-06	0	0	0	0	7.28636e-07	0	0	0	0	5.85864e-06	0	0	0	0	5.9085e-06	0	0	-	-	-	-	-	-	-	-	-	-	-	-	-	-	-	7.28636e-07	1.8279e-08	4.8017e-09	8.03471e-07	1.78741e-07	6.30618e-07	3.25256e-07	-	-	-	-	-
Zn low	8.1	0.84721	0	0	6.25139e-06	0	0	0	0	7.71029e-07	0	0	0	0	6.19949e-06	0	0	0	0	6.25139e-06	0	0	-	-	-	-	-	-	-	-	-	-	-	-	-	-	-	7.71029e-07	1.93425e-08	5.08107e-09	8.50216e-07	1.89138e-07	6.67307e-07	3.44174e-07	-	-	-	-	-
Zn low	8.1	0.84721	0	0	6.24458e-06	0	0	0	0	7.70187e-07	0	0	0	0	6.19272e-06	0	0	0	0	6.24458e-06	0	0	-	-	-	-	-	-	-	-	-	-	-	-	-	-	-	7.70187e-07	1.93214e-08	5.07552e-09	8.49288e-07	1.88931e-07	6.66579e-07	3.43798e-07	-	-	-	-	-
Zn low	8.2	1.03189	0	0	6.30745e-06	0	0	0	0	6.94361e-07	0	0	0	0	6.2623e-06	0	0	0	0	6.30745e-06	0	0	-	-	-	-	-	-	-	-	-	-	-	-	-	-	-	6.94361e-07	2.19294e-08	7.2522e-09	8.63435e-07	2.4855e-07	7.14111e-07	3.59264e-07	-	-	-	-	-
Zn low	8.2	1.03189	0	0	6.15937e-06	0	0	0	0	6.78027e-07	0	0	0	0	6.11498e-06	0	0	0	0	6.15937e-06	0	0	-	-	-	-	-	-	-	-	-	-	-	-	-	-	-	6.78027e-07	2.14136e-08	7.0816e-09	8.43124e-07	2.42704e-07	6.97312e-07	3.50815e-07	-	-	-	-	-
Zn low	8.2	1.03189	0	0	6.23597e-06	0	0	0	0	6.86476e-07	0	0	0	0	6.19118e-06	0	0	0	0	6.23597e-06	0	0	-	-	-	-	-	-	-	-	-	-	-	-	-	-	-	6.86476e-07	2.16804e-08	7.16984e-09	8.5363e-07	2.45728e-07	7.06001e-07	3.55185e-07	-	-	-	-	-
Zn high	8.1	1.03192	0	0	1.27617e-05	0	0	0	0	1.42009e-06	0	0	0	0	1.26885e-05	0	0	0	0	1.27617e-05	0	0	-	-	-	-	-	-	-	-	-	-	-	-	-	-	-	1.42009e-06	3.56254e-08	9.35839e-09	1.76574e-06	4.05539e-07	1.46048e-06	7.3796e-07	-	-	-	-	-
Zn high	8.1	1.03192	0	0	1.23429e-05	0	0	0	0	1.3734e-06	0	0	0	0	1.22713e-05	0	0	0	0	1.23429e-05	0	0	-	-	-	-	-	-	-	-	-	-	-	-	-	-	-	1.3734e-06	3.44541e-08	9.05071e-09	1.70769e-06	3.92213e-07	1.41246e-06	7.1371e-07	-	-	-	-	-
Zn high	8.1	1.03192	0	0	1.3222e-05	0	0	0	0	1.4714e-06	0	0	0	0	1.31468e-05	0	0	0	0	1.3222e-05	0	0	-	-	-	-	-	-	-	-	-	-	-	-	-	-	-	1.4714e-06	3.69125e-08	9.6965e-09	1.82953e-06	4.20182e-07	1.51324e-06	7.64606e-07	-	-	-	-	-
Zn high	8.1	1.03192	0	0	1.30776e-05	0	0	0	0	1.45531e-06	0	0	0	0	1.30031e-05	0	0	0	0	1.30776e-05	0	0	-	-	-	-	-	-	-	-	-	-	-	-	-	-	-	1.45531e-06	3.65088e-08	9.59047e-09	1.80953e-06	4.1559e-07	1.4967e-06	7.5625e-07	-	-	-	-	-
Ni high	7.8	0.28501	1.78543e-05	0	0	0	0	3.33158e-06	0	0	0	0	1.77785e-05	0	0	0	0	1.78543e-05	0	0	0	0	3.33158e-06	1.18965e-06	5.27342e-09	4.38061e-11	1.22849e-06	1.6275e-06	1.75963e-06	-	-	-	-	-	-	-	-	-	-	-	-	-	-	-	-	-	-	-	-
Ni high	7.7	0.28501	1.76353e-05	0	0	0	0	3.36324e-06	0	0	0	0	1.75605e-05	0	0	0	0	1.76353e-05	0	0	0	0	3.36324e-06	1.19347e-06	4.22863e-09	2.79024e-11	1.24016e-06	1.64294e-06	1.4022e-06	-	-	-	-	-	-	-	-	-	-	-	-	-	-	-	-	-	-	-	-
Ni high	7.8	0.47501	1.71855e-05	0	0	0	0	2.44345e-06	0	0	0	0	1.71344e-05	0	0	0	0	1.71855e-05	0	0	0	0	2.44345e-06	1.33382e-06	3.86763e-09	3.21283e-11	1.41181e-06	1.64209e-06	1.97286e-06	-	-	-	-	-	-	-	-	-	-	-	-	-	-	-	-	-	-	-	-
Ni high	7.8	0.47501	1.69535e-05	0	0	0	0	2.41041e-06	0	0	0	0	1.69029e-05	0	0	0	0	1.69535e-05	0	0	0	0	2.41041e-06	1.31583e-06	3.81533e-09	3.16938e-11	1.39272e-06	1.61989e-06	1.94626e-06	-	-	-	-	-	-	-	-	-	-	-	-	-	-	-	-	-	-	-	-
Ni high	7.9	0.6617	1.70903e-05	0	0	0	0	1.95085e-06	0	0	0	0	1.70507e-05	0	0	0	0	1.70903e-05	0	0	0	0	1.95085e-06	1.39619e-06	3.88745e-09	4.06544e-11	1.50659e-06	1.60947e-06	2.59982e-06	-	-	-	-	-	-	-	-	-	-	-	-	-	-	-	-	-	-	-	-
Ni high	7.9	0.6617	1.66941e-05	0	0	0	0	1.90556e-06	0	0	0	0	1.66552e-05	0	0	0	0	1.66941e-05	0	0	0	0	1.90556e-06	1.36385e-06	3.7972e-09	3.97106e-11	1.47162e-06	1.57211e-06	2.53961e-06	-	-	-	-	-	-	-	-	-	-	-	-	-	-	-	-	-	-	-	-
Ni high	8.1	0.84722	1.753e-05	0	0	0	0	1.58198e-06	0	0	0	0	1.74976e-05	0	0	0	0	1.753e-05	0	0	0	0	1.58198e-06	1.37393e-06	4.99624e-09	8.28106e-11	1.51657e-06	1.51932e-06	4.05475e-06	-	-	-	-	-	-	-	-	-	-	-	-	-	-	-	-	-	-	-	-
Ni high	8.1	0.84722	1.76158e-05	0	0	0	0	1.58974e-06	0	0	0	0	1.75833e-05	0	0	0	0	1.76158e-05	0	0	0	0	1.58974e-06	1.38065e-06	5.02073e-09	8.32165e-11	1.52401e-06	1.52677e-06	4.07457e-06	-	-	-	-	-	-	-	-	-	-	-	-	-	-	-	-	-	-	-	-
Ni high	8.1	0.84722	1.7639e-05	0	0	0	0	1.59183e-06	0	0	0	0	1.76065e-05	0	0	0	0	1.7639e-05	0	0	0	0	1.59183e-06	1.38246e-06	5.02736e-09	8.33263e-11	1.52602e-06	1.52878e-06	4.07994e-06	-	-	-	-	-	-	-	-	-	-	-	-	-	-	-	-	-	-	-	-
Ni high	8.2	1.0319	1.74088e-05	0	0	0	0	1.31218e-06	0	0	0	0	1.7382e-05	0	0	0	0	1.74088e-05	0	0	0	0	1.31218e-06	1.32114e-06	5.21719e-09	1.08863e-10	1.49479e-06	1.42112e-06	4.90851e-06	-	-	-	-	-	-	-	-	-	-	-	-	-	-	-	-	-	-	-	-
Ni high	8.2	1.0319	1.69335e-05	0	0	0	0	1.27631e-06	0	0	0	0	1.69073e-05	0	0	0	0	1.69335e-05	0	0	0	0	1.27631e-06	1.2851e-06	5.07456e-09	1.05886e-10	1.45393e-06	1.38227e-06	4.77462e-06	-	-	-	-	-	-	-	-	-	-	-	-	-	-	-	-	-	-	-	-
Ni high	8.2	1.0319	1.7554e-05	0	0	0	0	1.32315e-06	0	0	0	0	1.75271e-05	0	0	0	0	1.7554e-05	0	0	0	0	1.32315e-06	1.33216e-06	5.26078e-09	1.09772e-10	1.50728e-06	1.43299e-06	4.94943e-06	-	-	-	-	-	-	-	-	-	-	-	-	-	-	-	-	-	-	-	-
Ni high	8.2	1.0319	1.7646e-05	0	0	0	0	1.33008e-06	0	0	0	0	1.76189e-05	0	0	0	0	1.7646e-05	0	0	0	0	1.33008e-06	1.33913e-06	5.28837e-09	1.10348e-10	1.51519e-06	1.44051e-06	4.97532e-06	-	-	-	-	-	-	-	-	-	-	-	-	-	-	-	-	-	-	-	-
Sum EC10	7.7	0.28694	7.30172e-06	3.76045e-08	6.07594e-06	1.83802e-07	1.36536e-06	1.39005e-06	6.3811e-10	1.29542e-06	5.37451e-09	5.31249e-08	7.28296e-06	1.09595e-08	6.00327e-06	1.83696e-07	1.23755e-06	7.30172e-06	3.76045e-08	6.07594e-06	1.83802e-07	1.36536e-06	1.39005e-06	4.96462e-07	1.74772e-09	1.15323e-11	5.15538e-07	6.8119e-07	5.83292e-07	6.3811e-10	1.75525e-10	3.18992e-12	3.17561e-10	3.69616e-09	2.0562e-10	2.49891e-09	2.57399e-12	1.29542e-06	1.29376e-08	1.35299e-09	7.28867e-07	5.19118e-08	4.33743e-07	2.37283e-07	5.37451e-09	4.07175e-12	1.9917e-15	3.28222e-09	7.77447e-08
Sum EC10	7.7	0.28694	7.59145e-06	4.04519e-08	6.57367e-06	1.89111e-07	1.48323e-06	1.44536e-06	7.25063e-10	1.402e-06	5.52985e-09	5.78622e-08	7.57254e-06	1.24514e-08	6.49712e-06	1.89005e-07	1.34779e-06	7.59145e-06	4.04519e-08	6.57367e-06	1.89111e-07	1.48323e-06	1.44536e-06	5.16133e-07	1.81727e-09	1.19912e-11	5.36052e-07	7.0829e-07	6.06404e-07	7.25063e-10	1.99443e-10	3.6246e-12	3.60831e-10	4.19914e-09	2.33638e-10	2.83897e-09	2.92378e-12	1.402e-06	1.4002e-08	1.46431e-09	7.88827e-07	5.61736e-08	4.69428e-07	2.56763e-07	5.52985e-09	4.18944e-12	2.04926e-15	3.37706e-09	7.99917e-08
Sum EC10	7.7	0.28694	7.56093e-06	4.03518e-08	6.59394e-06	1.91727e-07	1.46753e-06	1.43955e-06	7.21633e-10	1.4063e-06	5.60634e-09	5.72376e-08	7.54207e-06	1.23926e-08	6.51704e-06	1.91619e-07	1.33325e-06	7.56093e-06	4.03518e-08	6.59394e-06	1.91727e-07	1.46753e-06	1.43955e-06	5.14062e-07	1.80995e-09	1.19429e-11	5.33894e-07	7.05439e-07	6.0397e-07	7.21633e-10	1.98499e-10	3.60745e-12	3.59124e-10	4.17933e-09	2.32533e-10	2.82557e-09	2.91002e-12	1.4063e-06	1.40449e-08	1.46879e-09	7.91245e-07	5.63465e-08	4.70867e-07	2.57553e-07	5.60634e-09	4.24738e-12	2.07761e-15	3.42377e-09	8.10981e-08
Sum EC10	7.9	0.47501	7.84566e-06	4.13819e-08	6.73499e-06	1.97623e-07	1.29274e-06	1.08337e-06	4.98439e-10	1.12843e-06	3.19594e-09	2.63646e-08	7.83214e-06	1.47912e-08	6.67673e-06	1.97565e-07	1.22797e-06	7.84566e-06	4.13819e-08	6.73499e-06	1.97623e-07	1.29274e-06	1.08337e-06	5.93675e-07	2.15883e-09	2.25767e-11	6.25964e-07	7.2808e-07	1.10548e-06	4.98439e-10	2.17297e-10	6.25887e-12	3.4018e-10	4.42981e-09	2.50221e-10	4.74663e-09	1.18894e-11	1.12843e-06	1.78614e-08	2.96045e-09	8.70716e-07	1.09963e-07	5.88625e-07	3.17137e-07	3.19594e-09	3.83743e-12	2.97497e-15	2.67666e-09	7.20235e-08
Sum EC10	7.9	0.47501	7.67979e-06	4.4463e-08	6.61685e-06	1.9471e-07	1.24703e-06	1.06046e-06	5.47192e-10	1.10865e-06	3.14882e-09	2.54293e-08	7.66663e-06	1.62387e-08	6.55973e-06	1.94653e-07	1.18445e-06	7.67979e-06	4.4463e-08	6.61685e-06	1.9471e-07	1.24703e-06	1.06046e-06	5.81153e-07	2.11318e-09	2.20993e-11	6.12727e-07	7.12685e-07	1.08216e-06	5.47192e-10	2.38551e-10	6.87106e-12	3.73454e-10	4.86336e-09	2.74696e-10	5.21119e-09	1.30537e-11	1.10865e-06	1.75483e-08	2.90856e-09	8.55456e-07	1.08041e-07	5.78308e-07	3.11595e-07	3.14882e-09	3.78086e-12	2.93111e-15	2.63721e-09	7.09617e-08
Sum EC10	7.9	0.47501	7.71599e-06	4.36884e-08	6.50734e-06	1.92057e-07	1.19954e-06	1.06544e-06	5.31234e-10	1.09024e-06	3.10591e-09	2.44524e-08	7.70268e-06	1.57654e-08	6.45082e-06	1.92e-07	1.13896e-06	7.71599e-06	4.36884e-08	6.50734e-06	1.92057e-07	1.19954e-06	1.06544e-06	5.83894e-07	2.1231e-09	2.22031e-11	6.15605e-07	7.16033e-07	1.08726e-06	5.31234e-10	2.31595e-10	6.67069e-12	3.62564e-10	4.72163e-09	2.66685e-10	5.05932e-09	1.26735e-11	1.09024e-06	1.72569e-08	2.86026e-09	8.41252e-07	1.0625e-07	5.68705e-07	3.06427e-07	3.10591e-09	3.72933e-12	2.89117e-15	2.60127e-09	6.99947e-08
Sum EC50	7.7	0.28501	7.99584e-06	8.96987e-08	1.3264e-05	2.24615e-05	1.46084e-06	1.52834e-06	2.39216e-09	2.84206e-06	6.61835e-07	5.78416e-08	7.98001e-06	4.08514e-08	1.3132e-05	2.24512e-05	1.33948e-06	7.99584e-06	8.96987e-08	1.3264e-05	2.24615e-05	1.46084e-06	1.52834e-06	5.42428e-07	1.92159e-09	1.26795e-11	5.63493e-07	7.46513e-07	6.37298e-07	2.39216e-09	6.58009e-10	1.19584e-11	1.18659e-09	1.37693e-08	7.66299e-10	9.30922e-09	9.52877e-12	2.84206e-06	2.83841e-08	2.96837e-09	1.59387e-06	1.13177e-07	9.46009e-07	5.17317e-07	6.61835e-07	5.01409e-10	2.45264e-13	4.02865e-07	9.51747e-06
Sum EC50	7.7	0.28501	8.13044e-06	9.44197e-08	1.36678e-05	2.2998e-05	1.45601e-06	1.55412e-06	2.5676e-09	2.92885e-06	6.77647e-07	5.76802e-08	8.11454e-06	4.38455e-08	1.3533e-05	2.29875e-05	1.33569e-06	8.13044e-06	9.44197e-08	1.36678e-05	2.2998e-05	1.45601e-06	1.55412e-06	5.51546e-07	1.95401e-09	1.28934e-11	5.72998e-07	7.59102e-07	6.4801e-07	2.5676e-09	7.06267e-10	1.28355e-11	1.27361e-09	1.47783e-08	8.22496e-10	9.99135e-09	1.02264e-11	2.92885e-06	2.92509e-08	3.05901e-09	1.64253e-06	1.16626e-07	9.74894e-07	5.33082e-07	6.77647e-07	5.13388e-10	2.51124e-13	4.12487e-07	9.74482e-06
Sum EC50	7.8	0.47501	7.78117e-06	9.28461e-08	1.31936e-05	2.24962e-05	1.32136e-06	1.10807e-06	1.75642e-09	2.22455e-06	3.63916e-07	3.08728e-08	7.77053e-06	4.82259e-08	1.30996e-05	2.2491e-05	1.25825e-06	7.78117e-06	9.28461e-08	1.31936e-05	2.24962e-05	1.32136e-06	1.10807e-06	6.05005e-07	1.75392e-09	1.45697e-11	6.40188e-07	7.44619e-07	8.94868e-07	1.75642e-09	6.08234e-10	1.39159e-11	1.19864e-09	1.55532e-08	8.81673e-10	1.32379e-08	2.62429e-11	2.22455e-06	2.79695e-08	3.68236e-09	1.71636e-06	1.71567e-07	1.16031e-06	6.22923e-07	3.63916e-07	3.47091e-10	2.1374e-13	3.04761e-07	8.20056e-06
Sum EC50	7.8	0.47501	7.7948e-06	9.44198e-08	1.32487e-05	2.26288e-05	1.29193e-06	1.11001e-06	1.79393e-09	2.23384e-06	3.6606e-07	3.01832e-08	7.78417e-06	4.92561e-08	1.31543e-05	2.26235e-05	1.23015e-06	7.7948e-06	9.44198e-08	1.32487e-05	2.26288e-05	1.29193e-06	1.11001e-06	6.06069e-07	1.75699e-09	1.45953e-11	6.4131e-07	7.45925e-07	8.96441e-07	1.79393e-09	6.21224e-10	1.42131e-11	1.22424e-09	1.58855e-08	9.00502e-10	1.35207e-08	2.68036e-11	2.23384e-06	2.80863e-08	3.69775e-09	1.72354e-06	1.72285e-07	1.16516e-06	6.25528e-07	3.6606e-07	3.49136e-10	2.14999e-13	3.06557e-07	8.24888e-06
Sum EC50	7.9	0.6617	7.60335e-06	8.24498e-08	1.20117e-05	2.15908e-05	1.2048e-06	8.68915e-07	1.14129e-09	1.71165e-06	2.30902e-07	1.863e-08	7.59515e-06	4.42165e-08	1.19423e-05	2.15876e-05	1.16673e-06	7.60335e-06	8.24498e-08	1.20117e-05	2.15908e-05	1.2048e-06	8.68915e-07	6.22089e-07	1.73149e-09	1.81076e-11	6.71006e-07	7.16837e-07	1.15838e-06	1.14129e-09	4.97551e-10	1.43311e-11	9.56165e-10	1.32517e-08	7.65744e-10	1.41994e-08	4.64671e-11	1.71165e-06	2.7093e-08	4.49054e-09	1.62128e-06	2.17916e-07	1.19332e-06	6.28477e-07	2.30902e-07	2.77249e-10	2.14938e-13	2.37391e-07	6.95473e-06
Sum EC50	7.9	0.6617	7.74268e-06	9.82613e-08	1.25021e-05	2.18403e-05	1.23202e-06	8.84886e-07	1.43309e-09	1.78179e-06	2.33572e-07	1.90607e-08	7.73462e-06	5.55189e-08	1.24316e-05	2.18371e-05	1.19366e-06	7.74268e-06	9.82613e-08	1.25021e-05	2.18403e-05	1.23202e-06	8.84886e-07	6.33486e-07	1.76331e-09	1.84404e-11	6.83339e-07	7.3001e-07	1.17961e-06	1.43309e-09	6.24763e-10	1.79952e-11	1.20063e-09	1.66388e-08	9.61525e-10	1.78288e-08	5.83408e-11	1.78179e-06	2.82032e-08	4.67456e-09	1.68771e-06	2.26833e-07	1.24222e-06	6.54193e-07	2.33572e-07	2.80454e-10	2.17422e-13	2.40134e-07	7.03511e-06
Sum EC10	8.1	0.84722	8.17761e-06	4.7758e-08	6.47359e-06	2.11196e-07	1.18128e-06	7.38427e-07	3.7054e-10	8.00814e-07	1.63754e-09	1.09724e-08	8.16948e-06	2.10937e-08	6.43775e-06	2.1117e-07	1.15484e-06	8.17761e-06	4.7758e-08	6.47359e-06	2.11196e-07	1.18128e-06	7.38427e-07	6.41755e-07	2.33211e-09	3.86538e-11	7.07896e-07	7.09177e-07	1.89395e-06	3.7054e-10	2.56022e-10	1.16874e-11	3.6139e-10	5.22272e-09	3.08628e-10	8.86945e-09	5.58416e-11	8.00814e-07	2.00897e-08	5.27735e-09	8.83038e-07	1.96152e-07	6.93083e-07	3.56939e-07	1.63754e-09	3.11627e-12	3.82893e-15	1.95989e-09	6.1229e-08
Sum EC10	8.1	0.84722	8.28987e-06	4.98256e-08	6.45909e-06	2.108e-07	1.21355e-06	7.48577e-07	3.93438e-10	7.99053e-07	1.63448e-09	1.12735e-08	8.2817e-06	2.23967e-08	6.42357e-06	2.10774e-07	1.1865e-06	8.28987e-06	4.98256e-08	6.45909e-06	2.108e-07	1.21355e-06	7.48577e-07	6.5056e-07	2.36417e-09	3.91851e-11	7.17626e-07	7.18925e-07	1.91994e-06	3.93438e-10	2.71843e-10	1.24097e-11	3.83722e-10	5.54533e-09	3.277e-10	9.41732e-09	5.92896e-11	7.99053e-07	2.00455e-08	5.26574e-09	8.81095e-07	1.95716e-07	6.91559e-07	3.56145e-07	1.63448e-09	3.11043e-12	3.82176e-15	1.95622e-09	6.11143e-08
Sum EC10	8.1	0.84722	8.30196e-06	5.1556e-08	6.39885e-06	2.08572e-07	1.21526e-06	7.49673e-07	4.12113e-10	7.91617e-07	1.61721e-09	1.12899e-08	8.29383e-06	2.34598e-08	6.3638e-06	2.08547e-07	1.18824e-06	8.30196e-06	5.1556e-08	6.39885e-06	2.08572e-07	1.21526e-06	7.49673e-07	6.51513e-07	2.36763e-09	3.92425e-11	7.18677e-07	7.19978e-07	1.92275e-06	4.12113e-10	2.84746e-10	1.29987e-11	4.01936e-10	5.80855e-09	3.43255e-10	9.86433e-09	6.21039e-11	7.91617e-07	1.9859e-08	5.21674e-09	8.72896e-07	1.93895e-07	6.85123e-07	3.52831e-07	1.61721e-09	3.07757e-12	3.78138e-15	1.93555e-09	6.04685e-08
Sum EC10	8.2	1.0319	7.9042e-06	4.0113e-08	6.63343e-06	1.96929e-07	1.2381e-06	5.96037e-07	2.34073e-10	7.32098e-07	1.17258e-09	8.2171e-09	7.89766e-06	1.74298e-08	6.60136e-06	1.9691e-07	1.21749e-06	7.9042e-06	4.0113e-08	6.63343e-06	1.96929e-07	1.2381e-06	5.96037e-07	6.00504e-07	2.36982e-09	4.9449e-11	6.78984e-07	6.45518e-07	2.23108e-06	2.34073e-10	2.03607e-10	1.17013e-11	2.57443e-10	3.82467e-09	2.31674e-10	8.177e-09	7.5134e-11	7.32098e-07	2.31212e-08	7.64633e-09	9.10342e-07	2.61705e-07	7.52918e-07	3.78279e-07	1.17258e-09	2.80922e-12	4.34539e-15	1.5826e-09	5.20994e-08
Sum EC10	8.2	1.0319	7.65876e-06	3.91407e-08	6.36161e-06	1.88642e-07	1.19829e-06	5.7751e-07	2.24642e-10	7.02063e-07	1.12324e-09	7.95179e-09	7.65235e-06	1.67283e-08	6.33058e-06	1.88625e-07	1.17823e-06	7.65876e-06	3.91407e-08	6.36161e-06	1.88642e-07	1.19829e-06	5.7751e-07	5.81869e-07	2.29616e-09	4.79119e-11	6.5788e-07	6.25454e-07	2.16185e-06	2.24642e-10	1.95404e-10	1.12299e-11	2.4707e-10	3.67076e-09	2.22339e-10	7.84795e-09	7.21145e-11	7.02063e-07	2.21727e-08	7.33264e-09	8.72996e-07	2.50982e-07	7.22029e-07	3.62779e-07	1.12324e-09	2.69101e-12	4.16253e-15	1.51601e-09	4.99071e-08
Sum EC10	8.2	1.0319	7.80805e-06	4.37408e-08	6.47132e-06	1.91518e-07	1.20943e-06	5.88786e-07	2.62749e-10	7.14236e-07	1.14037e-09	8.02734e-09	7.80168e-06	1.95655e-08	6.44032e-06	1.915e-07	1.1894e-06	7.80805e-06	4.37408e-08	6.47132e-06	1.91518e-07	1.20943e-06	5.88786e-07	5.93214e-07	2.34099e-09	4.88475e-11	6.70725e-07	6.37666e-07	2.204e-06	2.62749e-10	2.28551e-10	1.31349e-11	2.88982e-10	4.29334e-09	2.60056e-10	9.179e-09	8.4343e-11	7.14236e-07	2.25571e-08	7.45978e-09	8.88132e-07	2.55326e-07	7.34548e-07	3.69059e-07	1.14037e-09	2.73204e-12	4.22599e-15	1.53912e-09	5.06679e-08
Sum EC50	8.1	1.03191	7.85457e-06	9.43201e-08	1.1355e-05	2.45702e-05	1.13483e-06	6.27911e-07	8.57469e-10	1.26591e-06	1.46339e-07	8.85978e-09	7.84917e-06	5.71614e-08	1.1309e-05	2.45684e-05	1.11655e-06	7.85457e-06	9.43201e-08	1.1355e-05	2.45702e-05	1.13483e-06	6.27911e-07	6.35496e-07	1.98308e-09	3.28687e-11	7.15263e-07	6.79986e-07	1.87548e-06	8.57469e-10	5.92462e-10	2.7046e-11	9.43004e-10	1.40745e-08	8.48642e-10	2.39019e-08	1.75246e-10	1.26591e-06	3.17575e-08	8.34235e-09	1.574e-06	3.61093e-07	1.30186e-06	6.57081e-07	1.46339e-07	2.78486e-10	3.42173e-13	1.97494e-07	6.50175e-06
Sum EC50	8.1	1.03191	7.93269e-06	1.01434e-07	1.18549e-05	2.50386e-05	1.16948e-06	6.34174e-07	9.41952e-10	1.32172e-06	1.49129e-07	9.13172e-09	7.92734e-06	6.27911e-08	1.18074e-05	2.50367e-05	1.15079e-06	7.93269e-06	1.01434e-07	1.18549e-05	2.50386e-05	1.16948e-06	6.34174e-07	6.41809e-07	2.00286e-09	3.31965e-11	7.22397e-07	6.86766e-07	1.89411e-06	9.41952e-10	6.50835e-10	2.97107e-11	1.03591e-09	1.54606e-08	9.32254e-10	2.62558e-08	1.92497e-10	1.32172e-06	3.31574e-08	8.71008e-09	1.64338e-06	3.76995e-07	1.35924e-06	6.86018e-07	1.49129e-07	2.83794e-10	3.48695e-13	2.01258e-07	6.62569e-06
Sum EC50	8.1	1.03191	8.18557e-06	1.01023e-07	1.1782e-05	2.72419e-05	1.16554e-06	6.54398e-07	9.37391e-10	1.3136e-06	1.62253e-07	9.10107e-09	8.18005e-06	6.24856e-08	1.17348e-05	2.72399e-05	1.14691e-06	8.18557e-06	1.01023e-07	1.1782e-05	2.72419e-05	1.16554e-06	6.54398e-07	6.62258e-07	2.06673e-09	3.42552e-11	7.45431e-07	7.08667e-07	1.95446e-06	9.37391e-10	6.47684e-10	2.95669e-11	1.0309e-09	1.53853e-08	9.27738e-10	2.6128e-08	1.91554e-10	1.3136e-06	3.29537e-08	8.65657e-09	1.63329e-06	3.74668e-07	1.35089e-06	6.81784e-07	1.62253e-07	3.08769e-10	3.79381e-13	2.1897e-07	7.20874e-06
Sum EC50	8.1	1.03191	8.13466e-06	9.46858e-08	1.18092e-05	2.70904e-05	1.174e-06	6.50321e-07	8.64592e-10	1.31658e-06	1.61351e-07	9.16654e-09	8.12911e-06	5.76331e-08	1.17615e-05	2.70884e-05	1.15516e-06	8.13466e-06	9.46858e-08	1.18092e-05	2.70904e-05	1.174e-06	6.50321e-07	6.58136e-07	2.05386e-09	3.40418e-11	7.40788e-07	7.04252e-07	1.9423e-06	8.64592e-10	5.97383e-10	2.72706e-11	9.50835e-10	1.41905e-08	8.55688e-10	2.4099e-08	1.76679e-10	1.31658e-06	3.30286e-08	8.67625e-09	1.637e-06	3.75522e-07	1.35396e-06	6.83337e-07	1.61351e-07	3.07052e-10	3.77272e-13	2.17752e-07	7.16866e-06
Sum EC10 -Cu	7.7	0.28694	7.28504e-06	0	6.28866e-06	1.7478e-07	1.3902e-06	1.38621e-06	0	1.33906e-06	5.11022e-09	5.38404e-08	7.26283e-06	0	6.2055e-06	1.74663e-07	1.25421e-06	7.28504e-06	0	6.28866e-06	1.7478e-07	1.3902e-06	1.38621e-06	4.95085e-07	1.7429e-09	1.15004e-11	5.14114e-07	6.79307e-07	5.81674e-07	-	-	-	-	-	-	-	-	1.33906e-06	1.33734e-08	1.39857e-09	7.53418e-07	5.36598e-08	4.48354e-07	2.45273e-07	5.11022e-09	3.87152e-12	1.89376e-15	3.12082e-09	7.39217e-08
Sum EC10 -Cu	7.7	0.28694	7.37032e-06	0	6.18892e-06	1.76242e-07	1.4545e-06	1.40247e-06	0	1.31792e-06	5.15298e-09	5.63814e-08	7.34794e-06	0	6.10753e-06	1.76124e-07	1.31337e-06	7.37032e-06	0	6.18892e-06	1.76242e-07	1.4545e-06	1.40247e-06	5.00869e-07	1.76334e-09	1.16353e-11	5.20143e-07	6.87274e-07	5.8847e-07	-	-	-	-	-	-	-	-	1.31792e-06	1.31623e-08	1.37649e-09	7.41525e-07	5.28106e-08	4.41277e-07	2.41391e-07	5.15298e-09	3.90392e-12	1.9096e-15	3.14693e-09	7.45401e-08
Sum EC10 -Cu	7.7	0.28694	7.37372e-06	0	6.08792e-06	1.75667e-07	1.47634e-06	1.40311e-06	0	1.29642e-06	5.13618e-09	5.72386e-08	7.35131e-06	0	6.00788e-06	1.7555e-07	1.33334e-06	7.37372e-06	0	6.08792e-06	1.75667e-07	1.47634e-06	1.40311e-06	5.01097e-07	1.76415e-09	1.16406e-11	5.20382e-07	6.8759e-07	5.88738e-07	-	-	-	-	-	-	-	-	1.29642e-06	1.29475e-08	1.35403e-09	7.29427e-07	5.19487e-08	4.34077e-07	2.37451e-07	5.13618e-09	3.89119e-12	1.90338e-15	3.13667e-09	7.42972e-08
Sum EC10 -Cu	7.9	0.47501	7.64321e-06	0	5.83181e-06	1.7699e-07	1.26944e-06	1.05483e-06	0	9.75503e-07	2.86204e-09	2.57573e-08	7.62607e-06	0	5.77197e-06	1.76924e-07	1.19977e-06	7.64321e-06	0	5.83181e-06	1.7699e-07	1.26944e-06	1.05483e-06	5.78104e-07	2.10196e-09	2.1982e-11	6.09476e-07	7.08907e-07	1.07648e-06	-	-	-	-	-	-	-	-	9.75503e-07	1.54408e-08	2.55925e-09	7.52723e-07	9.50719e-08	5.08856e-07	2.7419e-07	2.86204e-09	3.43651e-12	2.66416e-15	2.39703e-09	6.44988e-08
Sum EC10 -Cu	7.9	0.47501	7.70147e-06	0	5.99784e-06	1.76775e-07	1.26195e-06	1.06289e-06	0	1.00332e-06	2.85856e-09	2.56084e-08	7.6843e-06	0	5.93653e-06	1.76709e-07	1.19282e-06	7.70147e-06	0	5.99784e-06	1.76775e-07	1.26195e-06	1.06289e-06	5.82511e-07	2.11802e-09	2.215e-11	6.14133e-07	7.14323e-07	1.08469e-06	-	-	-	-	-	-	-	-	1.00332e-06	1.58811e-08	2.63222e-09	7.74184e-07	9.77808e-08	5.23364e-07	2.82003e-07	2.85856e-09	3.43233e-12	2.66092e-15	2.39412e-09	6.44204e-08
Sum EC10 -Cu	7.9	0.47501	7.68332e-06	0	6.01987e-06	1.75776e-07	1.28267e-06	1.06039e-06	0	1.00703e-06	2.84241e-09	2.60328e-08	7.66622e-06	0	5.95847e-06	1.75711e-07	1.21259e-06	7.68332e-06	0	6.01987e-06	1.75776e-07	1.28267e-06	1.06039e-06	5.81138e-07	2.11304e-09	2.20979e-11	6.12689e-07	7.12643e-07	1.08213e-06	-	-	-	-	-	-	-	-	1.00703e-06	1.59398e-08	2.64195e-09	7.77045e-07	9.81416e-08	5.25299e-07	2.83044e-07	2.84241e-09	3.41295e-12	2.64589e-15	2.38059e-09	6.40565e-08
Sum EC10 -Cu	8.1	0.84722	7.86313e-06	0	5.41962e-06	1.83844e-07	1.11938e-06	7.09672e-07	0	6.69302e-07	1.42539e-09	1.0357e-08	7.85171e-06	0	5.38061e-06	1.83812e-07	1.09016e-06	7.86313e-06	0	5.41962e-06	1.83844e-07	1.11938e-06	7.09672e-07	6.1684e-07	2.2413e-09	3.71486e-11	6.80331e-07	6.81566e-07	1.82042e-06	-	-	-	-	-	-	-	-	6.69302e-07	1.67905e-08	4.41069e-09	7.38027e-07	1.6396e-07	5.79264e-07	2.98357e-07	1.42539e-09	2.71255e-12	3.33288e-15	1.70599e-09	5.32966e-08
Sum EC10 -Cu	8.1	0.84722	8.06484e-06	0	5.93565e-06	1.85046e-07	1.21426e-06	7.27927e-07	0	7.33155e-07	1.43472e-09	1.12406e-08	8.05344e-06	0	5.89387e-06	1.85015e-07	1.1831e-06	8.06484e-06	0	5.93565e-06	1.85046e-07	1.21426e-06	7.27927e-07	6.32656e-07	2.29895e-09	3.81041e-11	6.9783e-07	6.99095e-07	1.8671e-06	-	-	-	-	-	-	-	-	7.33155e-07	1.83924e-08	4.83148e-09	8.08433e-07	1.79587e-07	6.34526e-07	3.26795e-07	1.43472e-09	2.7303e-12	3.35469e-15	1.71715e-09	5.36453e-08
Sum EC10 -Cu	8.1	0.84722	7.96022e-06	0	5.62341e-06	1.84982e-07	1.13539e-06	7.18453e-07	0	6.94511e-07	1.43422e-09	1.05068e-08	7.94877e-06	0	5.58325e-06	1.8495e-07	1.1059e-06	7.96022e-06	0	5.62341e-06	1.84982e-07	1.13539e-06	7.18453e-07	6.24454e-07	2.26903e-09	3.76082e-11	6.88748e-07	6.89998e-07	1.84289e-06	-	-	-	-	-	-	-	-	6.94511e-07	1.74229e-08	4.57681e-09	7.65823e-07	1.7013e-07	6.01081e-07	3.09586e-07	1.43422e-09	2.72934e-12	3.35351e-15	1.71655e-09	5.36266e-08
Sum EC10 -Cu	8.2	1.0319	7.64146e-06	0	5.96557e-06	1.77798e-07	1.22659e-06	5.76004e-07	0	6.57484e-07	1.05863e-09	8.11863e-09	7.63245e-06	0	5.92862e-06	1.77775e-07	1.20297e-06	7.64146e-06	0	5.96557e-06	1.77798e-07	1.22659e-06	5.76004e-07	5.80363e-07	2.29017e-09	4.7787e-11	6.56164e-07	6.23824e-07	2.15625e-06	-	-	-	-	-	-	-	-	6.57484e-07	2.07648e-08	6.86704e-09	8.17564e-07	2.3505e-07	6.76183e-07	3.3975e-07	1.05863e-09	2.53622e-12	3.9231e-15	1.42881e-09	4.70364e-08
Sum EC10 -Cu	8.2	1.0319	7.67966e-06	0	6.17444e-06	1.78942e-07	1.23803e-06	5.78893e-07	0	6.80534e-07	1.06545e-09	8.19518e-09	7.67069e-06	0	6.13646e-06	1.78919e-07	1.2143e-06	7.67966e-06	0	6.17444e-06	1.78942e-07	1.23803e-06	5.78893e-07	5.83265e-07	2.30166e-09	4.80267e-11	6.59455e-07	6.26953e-07	2.16703e-06	-	-	-	-	-	-	-	-	6.80534e-07	2.14928e-08	7.10779e-09	8.46226e-07	2.43286e-07	6.99889e-07	3.51655e-07	1.06545e-09	2.55255e-12	3.94836e-15	1.43801e-09	4.73393e-08
Sum EC10 -Cu	8.2	1.0319	7.69565e-06	0	6.06343e-06	1.7958e-07	1.23967e-06	5.80095e-07	0	6.68287e-07	1.06925e-09	8.20571e-09	7.68662e-06	0	6.02602e-06	1.79557e-07	1.21586e-06	7.69565e-06	0	6.06343e-06	1.7958e-07	1.23967e-06	5.80095e-07	5.84477e-07	2.30644e-09	4.81264e-11	6.60825e-07	6.28255e-07	2.17154e-06	-	-	-	-	-	-	-	-	6.68287e-07	2.1106e-08	6.97987e-09	8.30997e-07	2.38908e-07	6.87293e-07	3.45328e-07	1.06925e-09	2.56165e-12	3.96244e-15	1.44313e-09	4.7508e-08
Sum EC50 -Cu	8.2	1.03189	7.84173e-06	0	1.09747e-05	2.62302e-05	1.11438e-06	5.9127e-07	0	1.21048e-06	1.56191e-07	7.38791e-09	7.83391e-06	0	1.09145e-05	2.62273e-05	1.09449e-06	7.84173e-06	0	1.09747e-05	2.62302e-05	1.11438e-06	5.9127e-07	5.95607e-07	2.35087e-09	4.90535e-11	6.73525e-07	6.40344e-07	2.21289e-06	-	-	-	-	-	-	-	-	1.21048e-06	3.82295e-08	1.26427e-08	1.50517e-06	4.32644e-07	1.24485e-06	6.25361e-07	1.56191e-07	3.74196e-10	5.78816e-13	2.10802e-07	6.93947e-06
Sum EC50 -Cu	8.1	1.03191	7.92458e-06	0	1.14002e-05	2.66287e-05	1.13864e-06	6.33296e-07	0	1.26936e-06	1.58595e-07	8.86536e-09	7.9165e-06	0	1.13398e-05	2.66258e-05	1.11726e-06	7.92458e-06	0	1.14002e-05	2.66287e-05	1.13864e-06	6.33296e-07	6.4095e-07	2.00009e-09	3.31506e-11	7.21395e-07	6.85817e-07	1.89158e-06	-	-	-	-	-	-	-	-	1.26936e-06	3.1844e-08	8.36508e-09	1.57829e-06	3.62079e-07	1.3054e-06	6.58875e-07	1.58595e-07	3.01808e-10	3.70829e-13	2.14034e-07	7.04624e-06
Sum EC50 -Cu	8.1	1.03191	7.98389e-06	0	1.09687e-05	2.38331e-05	1.14139e-06	6.38026e-07	0	1.22126e-06	1.41944e-07	8.88574e-09	7.97567e-06	0	1.09101e-05	2.38305e-05	1.11984e-06	7.98389e-06	0	1.09687e-05	2.38331e-05	1.14139e-06	6.38026e-07	6.45744e-07	2.01502e-09	3.33982e-11	7.26786e-07	6.9094e-07	1.90573e-06	-	-	-	-	-	-	-	-	1.22126e-06	3.06372e-08	8.04805e-09	1.51848e-06	3.4836e-07	1.25593e-06	6.33911e-07	1.41944e-07	2.70121e-10	3.31895e-13	1.91562e-07	6.30647e-06
Sum EC50 -Cu	8.1	1.03191	7.92578e-06	0	1.08329e-05	2.36426e-05	1.10189e-06	6.33373e-07	0	1.2061e-06	1.40809e-07	8.5775e-09	7.91757e-06	0	1.07747e-05	2.364e-05	1.08101e-06	7.92578e-06	0	1.08329e-05	2.36426e-05	1.10189e-06	6.33373e-07	6.41048e-07	2.00033e-09	3.31546e-11	7.21486e-07	6.85902e-07	1.89187e-06	-	-	-	-	-	-	-	-	1.2061e-06	3.0257e-08	7.94819e-09	1.49964e-06	3.44045e-07	1.24035e-06	6.26059e-07	1.40809e-07	2.67962e-10	3.29242e-13	1.90031e-07	6.25607e-06
Sum EC20	7.7	0.28695	1.10359e-05	5.48852e-08	9.41801e-06	2.65879e-07	2.25063e-06	2.10246e-06	1.24504e-09	2.0118e-06	7.77531e-09	8.89469e-08	1.10125e-05	2.13596e-08	9.32216e-06	2.65751e-07	2.07045e-06	1.10359e-05	5.48852e-08	9.41801e-06	2.65879e-07	2.25063e-06	2.10246e-06	7.49758e-07	2.64345e-09	1.74427e-11	7.79748e-07	1.03023e-06	8.80888e-07	1.24504e-09	3.42472e-10	6.22397e-12	6.19558e-10	7.20072e-09	4.01188e-10	4.86828e-09	5.00689e-12	2.0118e-06	2.00922e-08	2.10121e-09	1.13185e-06	8.04966e-08	6.73601e-07	3.6794e-07	7.77531e-09	5.8906e-12	2.88139e-15	4.74804e-09	1.12472e-07
Sum EC20	7.7	0.28695	1.10868e-05	5.34003e-08	9.29063e-06	2.68465e-07	2.14712e-06	2.11208e-06	1.19158e-09	1.98436e-06	7.8509e-09	8.47603e-08	1.1063e-05	2.04433e-08	9.19506e-06	2.68334e-07	1.97305e-06	1.10868e-05	5.34003e-08	9.29063e-06	2.68465e-07	2.14712e-06	2.11208e-06	7.5323e-07	2.65554e-09	1.75225e-11	7.83316e-07	1.03494e-06	8.84968e-07	1.19158e-09	3.27768e-10	5.95674e-12	5.92957e-10	6.89193e-09	3.83963e-10	4.65952e-09	4.79245e-12	1.98436e-06	1.98182e-08	2.07255e-09	1.11642e-06	7.94032e-08	6.64415e-07	3.62943e-07	7.8509e-09	5.94787e-12	2.9094e-15	4.79421e-09	1.13566e-07
Sum EC20	7.7	0.28695	1.10493e-05	6.0105e-08	9.36187e-06	2.67742e-07	2.28633e-06	2.10508e-06	1.40482e-09	1.99999e-06	7.82982e-09	9.04104e-08	1.10261e-05	2.41004e-08	9.26741e-06	2.67614e-07	2.1045e-06	1.10493e-05	6.0105e-08	9.36187e-06	2.67742e-07	2.28633e-06	2.10508e-06	7.50675e-07	2.64673e-09	1.74643e-11	7.80718e-07	1.03151e-06	8.81966e-07	1.40482e-09	3.86423e-10	7.02272e-12	6.99069e-10	8.12466e-09	4.52675e-10	5.49294e-09	5.64923e-12	1.99999e-06	1.99742e-08	2.08887e-09	1.12521e-06	8.00223e-08	6.69646e-07	3.65772e-07	7.82982e-09	5.9319e-12	2.90159e-15	4.78133e-09	1.13261e-07
Sum EC20	7.9	0.47501	1.16607e-05	6.6631e-08	9.20151e-06	2.88281e-07	1.85766e-06	1.61103e-06	1.03057e-09	1.54334e-06	4.66226e-09	3.8095e-08	1.16435e-05	3.05556e-08	9.13076e-06	2.88208e-07	1.77317e-06	1.16607e-05	6.6631e-08	9.20151e-06	2.88281e-07	1.85766e-06	1.61103e-06	8.81873e-07	3.21031e-09	3.35729e-11	9.30843e-07	1.08266e-06	1.64212e-06	1.03057e-09	4.49283e-10	1.29408e-11	7.03328e-10	9.14911e-09	5.17354e-10	9.80345e-09	2.4529e-11	1.54334e-06	2.44289e-08	4.04898e-09	1.19082e-06	1.50232e-07	8.05054e-07	4.33274e-07	4.66226e-09	5.59807e-12	4.33991e-15	3.90458e-09	1.05068e-07
Sum EC20	7.9	0.47501	1.14065e-05	6.44211e-08	8.98019e-06	2.82254e-07	1.76385e-06	1.57585e-06	9.79031e-10	1.50608e-06	4.56477e-09	3.61505e-08	1.13895e-05	2.90298e-08	8.9104e-06	2.82181e-07	1.68276e-06	1.14065e-05	6.44211e-08	8.98019e-06	2.82254e-07	1.76385e-06	1.57585e-06	8.62697e-07	3.14019e-09	3.28396e-11	9.10512e-07	1.05901e-06	1.60642e-06	9.79031e-10	4.26814e-10	1.22936e-11	6.68156e-10	8.69242e-09	4.91481e-10	9.3141e-09	2.33069e-11	1.50608e-06	2.38391e-08	3.95123e-09	1.16208e-06	1.4662e-07	7.85617e-07	4.22855e-07	4.56477e-09	5.48102e-12	4.24916e-15	3.82295e-09	1.02871e-07
Sum EC20	7.9	0.47501	1.16695e-05	7.12815e-08	9.23203e-06	2.88967e-07	1.81944e-06	1.61226e-06	1.125e-09	1.54852e-06	4.67336e-09	3.73126e-08	1.16524e-05	3.33558e-08	9.1614e-06	2.88894e-07	1.73676e-06	1.16695e-05	7.12815e-08	9.23203e-06	2.88967e-07	1.81944e-06	1.61226e-06	8.82553e-07	3.21275e-09	3.35985e-11	9.31551e-07	1.08348e-06	1.64339e-06	1.125e-09	4.90452e-10	1.41266e-11	7.67775e-10	9.98757e-09	5.64761e-10	1.07019e-08	2.67772e-11	1.54852e-06	2.45108e-08	4.06256e-09	1.19482e-06	1.50738e-07	8.07754e-07	4.34732e-07	4.67336e-09	5.6114e-12	4.35024e-15	3.91388e-09	1.05318e-07
Sum EC70	7.7	0.28503	1.2274e-05	1.43203e-07	2.00765e-05	3.42888e-05	2.29815e-06	2.3477e-06	4.72043e-09	4.30872e-06	1.01048e-06	9.2289e-08	1.22538e-05	8.04981e-08	1.9906e-05	3.42755e-05	2.13509e-06	1.2274e-05	1.43203e-07	2.00765e-05	3.42888e-05	2.29815e-06	2.3477e-06	8.31624e-07	2.95179e-09	1.94772e-11	8.65531e-07	1.14658e-06	9.77073e-07	4.72043e-09	1.29844e-09	2.35975e-11	2.34118e-09	2.71184e-08	1.51203e-09	1.83343e-08	1.87304e-11	4.30872e-06	4.30319e-08	4.5002e-09	2.41606e-06	1.7125e-07	1.4341e-06	7.82765e-07	1.01048e-06	7.65545e-10	3.74466e-13	6.15006e-07	1.45301e-05
Sum EC70	7.7	0.28503	1.23763e-05	1.36909e-07	2.00581e-05	3.45459e-05	2.23541e-06	2.36722e-06	4.46124e-09	4.30452e-06	1.01806e-06	8.97172e-08	1.23557e-05	7.60792e-08	1.98866e-05	3.45324e-05	2.07561e-06	1.23763e-05	1.36909e-07	2.00581e-05	3.45459e-05	2.23541e-06	2.36722e-06	8.38551e-07	2.97633e-09	1.96392e-11	8.72725e-07	1.15611e-06	9.85212e-07	4.46124e-09	1.22715e-09	2.23018e-11	2.21263e-09	2.56299e-08	1.429e-09	1.73279e-08	1.77026e-11	4.30452e-06	4.29899e-08	4.49582e-09	2.4137e-06	1.71086e-07	1.4327e-06	7.82016e-07	1.01806e-06	7.71284e-10	3.77273e-13	6.19616e-07	1.4639e-05
Sum EC70	7.8	0.47502	1.17885e-05	1.40056e-07	1.92612e-05	3.23085e-05	1.97095e-06	1.67959e-06	3.10219e-09	3.2507e-06	5.22689e-07	4.63272e-08	1.17747e-05	8.50891e-08	1.91397e-05	3.2302e-05	1.88674e-06	1.17885e-05	1.40056e-07	1.92612e-05	3.23085e-05	1.97095e-06	1.67959e-06	9.15862e-07	2.65855e-09	2.20845e-11	9.70346e-07	1.1286e-06	1.35466e-06	3.10219e-09	1.07426e-09	2.45784e-11	2.11689e-09	2.74344e-08	1.55715e-09	2.33505e-08	4.62299e-11	3.2507e-06	4.08713e-08	5.38097e-09	2.50791e-06	2.50382e-07	1.69548e-06	9.09083e-07	5.22689e-07	4.98523e-10	3.06992e-13	4.37694e-07	1.17779e-05
Sum EC70	7.8	0.47502	1.19231e-05	1.40056e-07	1.93805e-05	3.26857e-05	1.99894e-06	1.69879e-06	3.106e-09	3.27089e-06	5.28792e-07	4.69918e-08	1.19091e-05	8.51907e-08	1.92586e-05	3.26791e-05	1.91376e-06	1.19231e-05	1.40056e-07	1.93805e-05	3.26857e-05	1.99894e-06	1.69879e-06	9.26293e-07	2.68894e-09	2.23369e-11	9.81436e-07	1.14149e-06	1.37009e-06	3.106e-09	1.07558e-09	2.46085e-11	2.11948e-09	2.7467e-08	1.55906e-09	2.33782e-08	4.62829e-11	3.27089e-06	4.11252e-08	5.4144e-09	2.52349e-06	2.51927e-07	1.70601e-06	9.14693e-07	5.28792e-07	5.04344e-10	3.10577e-13	4.42804e-07	1.19154e-05
Sum EC70	7.9	0.6617	1.15489e-05	1.34557e-07	1.88875e-05	3.1474e-05	1.86174e-06	1.32048e-06	2.21131e-09	2.69366e-06	3.36618e-07	2.89014e-08	1.15384e-05	8.55914e-08	1.87915e-05	3.14699e-05	1.80875e-06	1.15489e-05	1.34557e-07	1.88875e-05	3.1474e-05	1.86174e-06	1.32048e-06	9.4431e-07	2.63133e-09	2.7518e-11	1.01969e-06	1.08931e-06	1.75839e-06	2.21131e-09	9.64034e-10	2.77673e-11	1.85252e-09	2.56467e-08	1.48363e-09	2.7481e-08	8.98285e-11	2.69366e-06	4.26368e-08	7.06687e-09	2.5513e-06	3.42551e-07	1.87789e-06	9.87927e-07	3.36618e-07	4.04184e-10	3.13344e-13	3.46057e-07	1.01386e-05
Sum EC70	7.9	0.6617	1.16691e-05	1.39158e-07	1.93311e-05	3.18018e-05	1.90684e-06	1.33426e-06	2.30761e-09	2.75705e-06	3.40125e-07	2.9608e-08	1.16586e-05	8.93146e-08	1.92336e-05	3.17977e-05	1.85291e-06	1.16691e-05	1.39158e-07	1.93311e-05	3.18018e-05	1.90684e-06	1.33426e-06	9.54107e-07	2.65877e-09	2.7805e-11	1.03033e-06	1.10067e-06	1.77663e-06	2.30761e-09	1.00601e-09	2.89765e-11	1.93319e-09	2.67621e-08	1.54823e-09	2.86761e-08	9.373e-11	2.75705e-06	4.36402e-08	7.23317e-09	2.61133e-06	3.50593e-07	1.92208e-06	1.01112e-06	3.40125e-07	4.08395e-10	3.16609e-13	3.49662e-07	1.02442e-05
Sum EC20	8.1	0.84722	1.2194e-05	7.21263e-08	9.33249e-06	2.98107e-07	1.67994e-06	1.10159e-06	6.80556e-10	1.15521e-06	2.31147e-09	1.56383e-08	1.21835e-05	3.87135e-08	9.28574e-06	2.98074e-07	1.64494e-06	1.2194e-05	7.21263e-08	9.33249e-06	2.98107e-07	1.67994e-06	1.10159e-06	9.56564e-07	3.47906e-09	5.76638e-11	1.05604e-06	1.05793e-06	2.82302e-06	6.80556e-10	4.70225e-10	2.14659e-11	6.63735e-10	9.58426e-09	5.66844e-10	1.62764e-08	1.02389e-10	1.15521e-06	2.89803e-08	7.61282e-09	1.27379e-06	2.8272e-07	9.99801e-07	5.14465e-07	2.31147e-09	4.39875e-12	5.4047e-15	2.76641e-09	8.64272e-08
Sum EC20	8.1	0.84722	1.21948e-05	7.25875e-08	9.23506e-06	2.9505e-07	1.6918e-06	1.10165e-06	6.85833e-10	1.14315e-06	2.28776e-09	1.57487e-08	1.21842e-05	3.90137e-08	9.18881e-06	2.95017e-07	1.65656e-06	1.21948e-05	7.25875e-08	9.23506e-06	2.9505e-07	1.6918e-06	1.10165e-06	9.56623e-07	3.47927e-09	5.76673e-11	1.0561e-06	1.05799e-06	2.82319e-06	6.85833e-10	4.73872e-10	2.16323e-11	6.68882e-10	9.65859e-09	5.71239e-10	1.64026e-08	1.03183e-10	1.14315e-06	2.86778e-08	7.53335e-09	1.2605e-06	2.79769e-07	9.89365e-07	5.09095e-07	2.28776e-09	4.35365e-12	5.34928e-15	2.73804e-09	8.55409e-08
Sum EC20	8.1	0.84722	1.23308e-05	7.42005e-08	9.079e-06	2.99053e-07	1.67475e-06	1.11395e-06	7.04793e-10	1.12384e-06	2.31881e-09	1.559e-08	1.23201e-05	4.00919e-08	9.03358e-06	2.99021e-07	1.63986e-06	1.23308e-05	7.42005e-08	9.079e-06	2.99053e-07	1.67475e-06	1.11395e-06	9.67289e-07	3.51808e-09	5.83107e-11	1.06789e-06	1.0698e-06	2.85467e-06	7.04793e-10	4.86971e-10	2.22303e-11	6.87373e-10	9.92552e-09	5.87031e-10	1.6856e-08	1.06034e-10	1.12384e-06	2.81934e-08	7.40609e-09	1.2392e-06	2.75041e-07	9.72652e-07	5.00492e-07	2.31881e-09	4.41272e-12	5.42187e-15	2.7752e-09	8.67017e-08
Sum EC20	8.2	1.0319	1.15723e-05	6.97027e-08	9.09968e-06	2.84273e-07	1.81141e-06	8.73016e-07	5.16718e-10	1.00492e-06	1.69269e-09	1.20442e-08	1.15642e-05	3.84511e-08	9.06047e-06	2.8425e-07	1.78355e-06	1.15723e-05	6.97027e-08	9.09968e-06	2.84273e-07	1.81141e-06	8.73016e-07	8.78915e-07	3.47108e-09	7.2428e-11	9.94507e-07	9.45475e-07	3.26548e-06	5.16718e-10	4.49465e-10	2.58308e-11	5.68297e-10	8.43682e-09	5.11421e-10	1.80376e-08	1.65616e-10	1.00492e-06	3.17376e-08	1.04958e-08	1.24957e-06	3.58969e-07	1.0335e-06	5.18868e-07	1.69269e-09	4.05526e-12	6.27279e-15	2.28453e-09	7.52081e-08
Sum EC20	8.2	1.0319	1.15801e-05	6.46205e-08	9.12638e-06	2.8352e-07	1.81446e-06	8.73593e-07	4.68451e-10	1.00783e-06	1.6882e-09	1.20636e-08	1.15718e-05	3.48592e-08	9.0867e-06	2.83496e-07	1.78642e-06	1.15801e-05	6.46205e-08	9.12638e-06	2.8352e-07	1.81446e-06	8.73593e-07	8.79494e-07	3.47337e-09	7.24758e-11	9.95164e-07	9.46099e-07	3.26763e-06	4.68451e-10	4.0748e-10	2.34179e-11	5.15212e-10	7.64871e-09	4.63649e-10	1.63526e-08	1.50145e-10	1.00783e-06	3.18295e-08	1.05262e-08	1.25319e-06	3.60008e-07	1.03649e-06	5.2037e-07	1.6882e-09	4.04451e-12	6.25617e-15	2.27847e-09	7.50088e-08
Sum EC20	8.2	1.0319	1.15489e-05	6.67958e-08	8.90089e-06	2.80741e-07	1.75993e-06	8.71231e-07	4.87741e-10	9.82932e-07	1.67166e-09	1.17006e-08	1.15406e-05	3.62955e-08	8.86223e-06	2.80718e-07	1.73272e-06	1.15489e-05	6.67958e-08	8.90089e-06	2.80741e-07	1.75993e-06	8.71231e-07	8.77139e-07	3.46398e-09	7.22799e-11	9.92474e-07	9.43542e-07	3.25888e-06	4.87741e-10	4.24259e-10	2.43822e-11	5.36428e-10	7.96388e-09	4.82741e-10	1.70265e-08	1.56336e-10	9.82932e-07	3.10431e-08	1.02662e-08	1.22223e-06	3.51122e-07	1.01088e-06	5.07526e-07	1.67166e-09	4.00488e-12	6.19486e-15	2.25614e-09	7.42737e-08
Sum EC70	8.1	1.03191	1.19383e-05	1.47635e-07	2.143e-05	3.76411e-05	1.85001e-06	9.5488e-07	1.5449e-09	2.39063e-06	2.242e-07	1.44753e-08	1.19314e-05	1.02888e-07	2.13532e-05	3.76386e-05	1.82285e-06	1.19383e-05	1.47635e-07	2.143e-05	3.76411e-05	1.85001e-06	9.5488e-07	9.65359e-07	3.01572e-09	4.99842e-11	1.08769e-06	1.03402e-06	2.84898e-06	1.5449e-09	1.06743e-09	4.87285e-11	1.69892e-09	2.53302e-08	1.52895e-09	4.30169e-08	3.1505e-10	2.39063e-06	5.99728e-08	1.57542e-08	2.9723e-06	6.81165e-07	2.45844e-06	1.23952e-06	2.242e-07	4.26655e-10	5.24227e-13	3.02557e-07	9.96078e-06
Sum EC70	8.1	1.03192	1.20634e-05	1.49924e-07	2.1801e-05	3.79995e-05	1.89516e-06	9.64903e-07	1.57498e-09	2.43207e-06	2.26335e-07	1.48297e-08	1.20564e-05	1.04888e-07	2.17232e-05	3.7997e-05	1.86743e-06	1.20634e-05	1.49924e-07	2.1801e-05	3.79995e-05	1.89516e-06	9.64903e-07	9.75452e-07	3.04737e-09	5.05089e-11	1.09911e-06	1.04487e-06	2.87876e-06	1.57498e-09	1.08822e-09	4.96775e-11	1.73201e-09	2.58225e-08	1.55873e-09	4.38529e-08	3.21159e-10	2.43207e-06	6.10124e-08	1.60273e-08	3.02382e-06	6.92944e-07	2.50105e-06	1.26095e-06	2.26335e-07	4.30719e-10	5.29219e-13	3.05438e-07	1.00556e-05
Sum EC70	8.1	1.03192	1.16963e-05	1.45364e-07	2.09809e-05	3.30223e-05	1.82006e-06	9.35498e-07	1.51439e-09	2.34046e-06	1.96687e-07	1.42395e-08	1.16894e-05	1.00861e-07	2.09052e-05	3.30202e-05	1.79324e-06	1.16963e-05	1.45364e-07	2.09809e-05	3.30223e-05	1.82006e-06	9.35498e-07	9.45818e-07	2.95451e-09	4.89697e-11	1.06562e-06	1.01304e-06	2.79131e-06	1.51439e-09	1.04635e-09	4.77662e-11	1.66538e-09	2.48314e-08	1.49877e-09	4.21698e-08	3.08863e-10	2.34046e-06	5.87141e-08	1.54236e-08	2.90993e-06	6.66907e-07	2.40686e-06	1.21357e-06	1.96687e-07	3.74298e-10	4.59896e-13	2.6543e-07	8.73851e-06
Sum EC70	8.1	1.03192	1.16801e-05	1.43838e-07	2.08596e-05	3.30473e-05	1.83905e-06	9.342e-07	1.49542e-09	2.32691e-06	1.96836e-07	1.4388e-08	1.16732e-05	9.9598e-08	2.07843e-05	3.30452e-05	1.81194e-06	1.16801e-05	1.43838e-07	2.08596e-05	3.30473e-05	1.83905e-06	9.342e-07	9.4451e-07	2.95041e-09	4.89017e-11	1.06414e-06	1.01163e-06	2.78745e-06	1.49542e-09	1.03325e-09	4.71679e-11	1.64452e-09	2.45204e-08	1.47999e-09	4.16417e-08	3.04996e-10	2.32691e-06	5.83744e-08	1.53343e-08	2.89309e-06	6.6305e-07	2.39294e-06	1.20655e-06	1.96836e-07	3.74582e-10	4.60244e-13	2.65631e-07	8.74512e-06
Cu high	7.9	0.65052	0	9.34374e-08	0	0	0	0	1.12911e-09	0	0	0	0	4.32226e-08	0	0	0	0	9.34374e-08	0	0	0	-	-	-	-	-	-	-	1.12911e-09	4.92241e-10	1.41782e-11	9.36351e-10	1.29602e-08	7.46414e-10	1.38871e-08	4.49251e-11	-	-	-	-	-	-	-	-	-	-	-	-
Cu high	7.9	0.65423	0	8.70425e-08	0	0	0	0	1.01388e-09	0	0	0	0	3.8992e-08	0	0	0	0	8.70425e-08	0	0	0	-	-	-	-	-	-	-	1.01388e-09	4.42008e-10	1.27313e-11	8.437e-10	1.16913e-08	6.73613e-10	1.25274e-08	4.07133e-11	-	-	-	-	-	-	-	-	-	-	-	-
Cu low	7.9	0.66168	0	8.32736e-08	0	0	0	0	9.44535e-10	0	0	0	0	3.66568e-08	0	0	0	0	8.32736e-08	0	0	0	-	-	-	-	-	-	-	9.44535e-10	4.11775e-10	1.18605e-11	7.91406e-10	1.09899e-08	6.33772e-10	1.17759e-08	3.86161e-11	-	-	-	-	-	-	-	-	-	-	-	-
Cu low	7.9	0.66168	0	7.59925e-08	0	0	0	0	8.20192e-10	0	0	0	0	3.18312e-08	0	0	0	0	7.59925e-08	0	0	0	-	-	-	-	-	-	-	8.20192e-10	3.57567e-10	1.02991e-11	6.87222e-10	9.54315e-09	5.5034e-10	1.02257e-08	3.35326e-11	-	-	-	-	-	-	-	-	-	-	-	-
Cu high	8	0.65422	0	6.37827e-08	0	0	0	0	5.6293e-10	0	0	0	0	2.36278e-08	0	0	0	0	6.37827e-08	0	0	0	-	-	-	-	-	-	-	5.6293e-10	3.08956e-10	1.12031e-11	4.68455e-10	6.49574e-09	3.74005e-10	8.76251e-09	3.58759e-11	-	-	-	-	-	-	-	-	-	-	-	-
Cu high	7.9	0.65423	0	7.70569e-08	0	0	0	0	8.4138e-10	0	0	0	0	3.2358e-08	0	0	0	0	7.70569e-08	0	0	0	-	-	-	-	-	-	-	8.4138e-10	3.66804e-10	1.05652e-11	7.00152e-10	9.70213e-09	5.59004e-10	1.0396e-08	3.37865e-11	-	-	-	-	-	-	-	-	-	-	-	-
Cu low	7.9	0.65423	0	4.48302e-08	0	0	0	0	3.28014e-10	0	0	0	0	1.26149e-08	0	0	0	0	4.48302e-08	0	0	0	-	-	-	-	-	-	-	3.28014e-10	1.42999e-10	4.11885e-12	2.72956e-10	3.78243e-09	2.17929e-10	4.05295e-09	1.31719e-11	-	-	-	-	-	-	-	-	-	-	-	-
Cu low	7.9	0.65423	0	4.01933e-08	0	0	0	0	2.63955e-10	0	0	0	0	1.01513e-08	0	0	0	0	4.01933e-08	0	0	0	-	-	-	-	-	-	-	2.63955e-10	1.15073e-10	3.31447e-12	2.19649e-10	3.04375e-09	1.75369e-10	3.26144e-09	1.05996e-11	-	-	-	-	-	-	-	-	-	-	-	-
Cu low	8	0.66168	0	4.09133e-08	0	0	0	0	2.46803e-10	0	0	0	0	1.04532e-08	0	0	0	0	4.09133e-08	0	0	0	-	-	-	-	-	-	-	2.46803e-10	1.35454e-10	4.91172e-12	2.06797e-10	2.87352e-09	1.65602e-10	3.87628e-09	1.60133e-11	-	-	-	-	-	-	-	-	-	-	-	-
Cu low	8	0.66168	0	3.61919e-08	0	0	0	0	1.91426e-10	0	0	0	0	8.10781e-09	0	0	0	0	3.61919e-08	0	0	0	-	-	-	-	-	-	-	1.91426e-10	1.05062e-10	3.80966e-12	1.60397e-10	2.22878e-09	1.28445e-10	3.00654e-09	1.24203e-11	-	-	-	-	-	-	-	-	-	-	-	-
Cu high	7.9	0.65423	0	1.70263e-07	0	0	0	0	2.57278e-09	0	0	0	0	9.89424e-08	0	0	0	0	1.70263e-07	0	0	0	-	-	-	-	-	-	-	2.57278e-09	1.12162e-09	3.23063e-11	2.14094e-09	2.96665e-08	1.70933e-09	3.17883e-08	1.03307e-10	-	-	-	-	-	-	-	-	-	-	-	-
Cu high	7.9	0.65423	0	1.73046e-07	0	0	0	0	2.62768e-09	0	0	0	0	1.01054e-07	0	0	0	0	1.73046e-07	0	0	0	-	-	-	-	-	-	-	2.62768e-09	1.14555e-09	3.29957e-11	2.18662e-09	3.02995e-08	1.7458e-09	3.24665e-08	1.05511e-10	-	-	-	-	-	-	-	-	-	-	-	-
Cu high	7.9	0.66168	0	1.61678e-07	0	0	0	0	2.39185e-09	0	0	0	0	9.28243e-08	0	0	0	0	1.61678e-07	0	0	0	-	-	-	-	-	-	-	2.39185e-09	1.04274e-09	3.00343e-11	2.00408e-09	2.78291e-08	1.6049e-09	2.98194e-08	9.77832e-11	-	-	-	-	-	-	-	-	-	-	-	-
Cu high	7.9	0.66168	0	1.57601e-07	0	0	0	0	2.31292e-09	0	0	0	0	8.97611e-08	0	0	0	0	1.57601e-07	0	0	0	-	-	-	-	-	-	-	2.31292e-09	1.00833e-09	2.90432e-11	1.93794e-09	2.69107e-08	1.55194e-09	2.88354e-08	9.45564e-11	-	-	-	-	-	-	-	-	-	-	-	-
Cu high	7.9	0.65423	0	1.50296e-07	0	0	0	0	2.1834e-09	0	0	0	0	8.39682e-08	0	0	0	0	1.50296e-07	0	0	0	-	-	-	-	-	-	-	2.1834e-09	9.51866e-10	2.74169e-11	1.81691e-09	2.51767e-08	1.45063e-09	2.69774e-08	8.76729e-11	-	-	-	-	-	-	-	-	-	-	-	-
Cu high	7.9	0.65423	0	1.64831e-07	0	0	0	0	2.46607e-09	0	0	0	0	9.48388e-08	0	0	0	0	1.64831e-07	0	0	0	-	-	-	-	-	-	-	2.46607e-09	1.0751e-09	3.09664e-11	2.05214e-09	2.84361e-08	1.63843e-09	3.04698e-08	9.90226e-11	-	-	-	-	-	-	-	-	-	-	-	-
Cu high	7.9	0.65423	0	8.06147e-08	0	0	0	0	9.02328e-10	0	0	0	0	3.47019e-08	0	0	0	0	8.06147e-08	0	0	0	-	-	-	-	-	-	-	9.02328e-10	3.93375e-10	1.13305e-11	7.5087e-10	1.04049e-08	5.99498e-10	1.11491e-08	3.62339e-11	-	-	-	-	-	-	-	-	-	-	-	-
Cu high	7.9	0.65423	0	8.39204e-08	0	0	0	0	9.59477e-10	0	0	0	0	3.68997e-08	0	0	0	0	8.39204e-08	0	0	0	-	-	-	-	-	-	-	9.59477e-10	4.18289e-10	1.20481e-11	7.98426e-10	1.10639e-08	6.37467e-10	1.18552e-08	3.85286e-11	-	-	-	-	-	-	-	-	-	-	-	-
Cu high	8	0.66168	0	7.55357e-08	0	0	0	0	7.38633e-10	0	0	0	0	3.12843e-08	0	0	0	0	7.55357e-08	0	0	0	-	-	-	-	-	-	-	7.38633e-10	4.05388e-10	1.46998e-11	6.18904e-10	8.59983e-09	4.95615e-10	1.16009e-08	4.79238e-11	-	-	-	-	-	-	-	-	-	-	-	-
Cu high	8	0.66168	0	7.55357e-08	0	0	0	0	7.38632e-10	0	0	0	0	3.12843e-08	0	0	0	0	7.55357e-08	0	0	0	-	-	-	-	-	-	-	7.38632e-10	4.05387e-10	1.46998e-11	6.18903e-10	8.59982e-09	4.95614e-10	1.16008e-08	4.79238e-11	-	-	-	-	-	-	-	-	-	-	-	-
Control	7.7	0.27931	0	0	0	0	0	0	0	0	0	0	0	0	0	0	0	0	0	0	0	0	-	-	-	-	-	-	-	-	-	-	-	-	-	-	-	-	-	-	-	-	-	-	-	-	-	-	-
Control	7.7	0.28315	0	0	0	0	0	0	0	0	0	0	0	0	0	0	0	0	0	0	0	0	-	-	-	-	-	-	-	-	-	-	-	-	-	-	-	-	-	-	-	-	-	-	-	-	-	-	-
Control	7.7	0.28499	0	0	0	0	0	0	0	0	0	0	0	0	0	0	0	0	0	0	0	0	-	-	-	-	-	-	-	-	-	-	-	-	-	-	-	-	-	-	-	-	-	-	-	-	-	-	-
Control	7.9	0.34166	0	0	0	0	0	0	0	0	0	0	0	0	0	0	0	0	0	0	0	0	-	-	-	-	-	-	-	-	-	-	-	-	-	-	-	-	-	-	-	-	-	-	-	-	-	-	-
Control	7.9	0.34166	0	0	0	0	0	0	0	0	0	0	0	0	0	0	0	0	0	0	0	0	-	-	-	-	-	-	-	-	-	-	-	-	-	-	-	-	-	-	-	-	-	-	-	-	-	-	-
Control	7.9	0.46939	0	0	0	0	0	0	0	0	0	0	0	0	0	0	0	0	0	0	0	0	-	-	-	-	-	-	-	-	-	-	-	-	-	-	-	-	-	-	-	-	-	-	-	-	-	-	-
Control	7.9	0.47692	0	0	0	0	0	0	0	0	0	0	0	0	0	0	0	0	0	0	0	0	-	-	-	-	-	-	-	-	-	-	-	-	-	-	-	-	-	-	-	-	-	-	-	-	-	-	-
Control	7.9	0.4731	0	0	0	0	0	0	0	0	0	0	0	0	0	0	0	0	0	0	0	0	-	-	-	-	-	-	-	-	-	-	-	-	-	-	-	-	-	-	-	-	-	-	-	-	-	-	-
Control	7.9	0.47499	0	0	0	0	0	0	0	0	0	0	0	0	0	0	0	0	0	0	0	0	-	-	-	-	-	-	-	-	-	-	-	-	-	-	-	-	-	-	-	-	-	-	-	-	-	-	-
Control	7.9	0.47499	0	0	0	0	0	0	0	0	0	0	0	0	0	0	0	0	0	0	0	0	-	-	-	-	-	-	-	-	-	-	-	-	-	-	-	-	-	-	-	-	-	-	-	-	-	-	-
Control	7.9	0.66168	0	0	0	0	0	0	0	0	0	0	0	0	0	0	0	0	0	0	0	0	-	-	-	-	-	-	-	-	-	-	-	-	-	-	-	-	-	-	-	-	-	-	-	-	-	-	-
Control	7.9	0.66168	0	0	0	0	0	0	0	0	0	0	0	0	0	0	0	0	0	0	0	0	-	-	-	-	-	-	-	-	-	-	-	-	-	-	-	-	-	-	-	-	-	-	-	-	-	-	-
Control	8.1	0.8472	0	0	0	0	0	0	0	0	0	0	0	0	0	0	0	0	0	0	0	0	-	-	-	-	-	-	-	-	-	-	-	-	-	-	-	-	-	-	-	-	-	-	-	-	-	-	-
Control	8.1	0.85095	0	0	0	0	0	0	0	0	0	0	0	0	0	0	0	0	0	0	0	0	-	-	-	-	-	-	-	-	-	-	-	-	-	-	-	-	-	-	-	-	-	-	-	-	-	-	-
Control	8.1	0.85274	0	0	0	0	0	0	0	0	0	0	0	0	0	0	0	0	0	0	0	0	-	-	-	-	-	-	-	-	-	-	-	-	-	-	-	-	-	-	-	-	-	-	-	-	-	-	-
Control	8.2	1.0356	0	0	0	0	0	0	0	0	0	0	0	0	0	0	0	0	0	0	0	0	-	-	-	-	-	-	-	-	-	-	-	-	-	-	-	-	-	-	-	-	-	-	-	-	-	-	-
Control	8.2	1.03926	0	0	0	0	0	0	0	0	0	0	0	0	0	0	0	0	0	0	0	0	-	-	-	-	-	-	-	-	-	-	-	-	-	-	-	-	-	-	-	-	-	-	-	-	-	-	-
Control	8.2	1.03739	0	0	0	0	0	0	0	0	0	0	0	0	0	0	0	0	0	0	0	0	-	-	-	-	-	-	-	-	-	-	-	-	-	-	-	-	-	-	-	-	-	-	-	-	-	-	-
Control	8.1	0.65422	0	0	0	0	0	0	0	0	0	0	0	0	0	0	0	0	0	0	0	0	-	-	-	-	-	-	-	-	-	-	-	-	-	-	-	-	-	-	-	-	-	-	-	-	-	-	-
Control	8.1	0.65422	0	0	0	0	0	0	0	0	0	0	0	0	0	0	0	0	0	0	0	0	-	-	-	-	-	-	-	-	-	-	-	-	-	-	-	-	-	-	-	-	-	-	-	-	-	-	-
Control	8.1	0.65422	0	0	0	0	0	0	0	0	0	0	0	0	0	0	0	0	0	0	0	0	-	-	-	-	-	-	-	-	-	-	-	-	-	-	-	-	-	-	-	-	-	-	-	-	-	-	-
Control	8.1	0.65422	0	0	0	0	0	0	0	0	0	0	0	0	0	0	0	0	0	0	0	0	-	-	-	-	-	-	-	-	-	-	-	-	-	-	-	-	-	-	-	-	-	-	-	-	-	-	-
Control	7.9	0.65793	0	0	0	0	0	0	0	0	0	0	0	0	0	0	0	0	0	0	0	0	-	-	-	-	-	-	-	-	-	-	-	-	-	-	-	-	-	-	-	-	-	-	-	-	-	-	-
Control	8	0.65792	0	0	0	0	0	0	0	0	0	0	0	0	0	0	0	0	0	0	0	0	-	-	-	-	-	-	-	-	-	-	-	-	-	-	-	-	-	-	-	-	-	-	-	-	-	-	-
Control	8	0.65422	0	0	0	0	0	0	0	0	0	0	0	0	0	0	0	0	0	0	0	0	-	-	-	-	-	-	-	-	-	-	-	-	-	-	-	-	-	-	-	-	-	-	-	-	-	-	-
Control	8	0.65422	0	0	0	0	0	0	0	0	0	0	0	0	0	0	0	0	0	0	0	0	-	-	-	-	-	-	-	-	-	-	-	-	-	-	-	-	-	-	-	-	-	-	-	-	-	-	-
Control	8	0.64864	0	0	0	0	0	0	0	0	0	0	0	0	0	0	0	0	0	0	0	0	-	-	-	-	-	-	-	-	-	-	-	-	-	-	-	-	-	-	-	-	-	-	-	-	-	-	-
Control	7.9	0.65612	0	0	0	0	0	0	0	0	0	0	0	0	0	0	0	0	0	0	0	0	-	-	-	-	-	-	-	-	-	-	-	-	-	-	-	-	-	-	-	-	-	-	-	-	-	-	-
Control	8	0.66168	0	0	0	0	0	0	0	0	0	0	0	0	0	0	0	0	0	0	0	0	-	-	-	-	-	-	-	-	-	-	-	-	-	-	-	-	-	-	-	-	-	-	-	-	-	-	-
Control	8	0.66168	0	0	0	0	0	0	0	0	0	0	0	0	0	0	0	0	0	0	0	0	-	-	-	-	-	-	-	-	-	-	-	-	-	-	-	-	-	-	-	-	-	-	-	-	-	-	-
[truncated: 115 more columns]

## Sheet: Nickel
Treatment	pH	Ionic strength (M)	Total (M): Ni	Free ion activity (M): Ni	Total true solution concentration (M): Ni	Activity (M): Ni[2+]	Activity (M): NiHCO3[+]	Activity (M): NiOH[+]	Activity (M): Ni(OH)2[0]	Activity (M): NiCl[+]	Activity (M): NiSO4[0]	Activity (M): NiCO3[0]	Aqueous concentration (M): Ni[2+]	Aqueous concentration (M): NiHCO3[+]	Aqueous concentration (M): NiOH[+]	Aqueous concentration (M): Ni(OH)2[0]	Aqueous concentration (M): NiCl[+]	Aqueous concentration (M): NiSO4[0]	Aqueous concentration (M): NiCO3[0]	Fraction bound to colloidal HA : Ni	Fraction bound to colloidal FA : Ni
Cu high	7.7	0.28499	0	0	0	-	-	-	-	-	-	-	-	-	-	-	-	-	-	0	0
Cu high	7.7	0.28499	0	0	0	-	-	-	-	-	-	-	-	-	-	-	-	-	-	0	0
Cu high	7.7	0.47499	0	0	0	-	-	-	-	-	-	-	-	-	-	-	-	-	-	0	0
Cu high	7.8	0.47499	0	0	0	-	-	-	-	-	-	-	-	-	-	-	-	-	-	0	0
Cu high	7.9	0.66168	0	0	0	-	-	-	-	-	-	-	-	-	-	-	-	-	-	0	0
Cu high	7.9	0.66168	0	0	0	-	-	-	-	-	-	-	-	-	-	-	-	-	-	0	0
Cu high	8.1	1.0319	0	0	0	-	-	-	-	-	-	-	-	-	-	-	-	-	-	0	0
Cu high	8.1	1.0319	0	0	0	-	-	-	-	-	-	-	-	-	-	-	-	-	-	0	0
Cu high	8.1	1.0319	0	0	0	-	-	-	-	-	-	-	-	-	-	-	-	-	-	0	0
Cu high	8.1	1.0319	0	0	0	-	-	-	-	-	-	-	-	-	-	-	-	-	-	0	0
Cd low	7.7	0.28692	0	0	0	-	-	-	-	-	-	-	-	-	-	-	-	-	-	0	0
Cd low	7.7	0.28692	0	0	0	-	-	-	-	-	-	-	-	-	-	-	-	-	-	0	0
Cd low	7.7	0.28692	0	0	0	-	-	-	-	-	-	-	-	-	-	-	-	-	-	0	0
Cd low	7.9	0.47499	0	0	0	-	-	-	-	-	-	-	-	-	-	-	-	-	-	0	0
Cd low	8	0.47499	0	0	0	-	-	-	-	-	-	-	-	-	-	-	-	-	-	0	0
Cd low	8	0.47499	0	0	0	-	-	-	-	-	-	-	-	-	-	-	-	-	-	0	0
Cd high	7.7	0.28499	0	0	0	-	-	-	-	-	-	-	-	-	-	-	-	-	-	0	0
Cd high	7.7	0.28499	0	0	0	-	-	-	-	-	-	-	-	-	-	-	-	-	-	0	0
Cd high	7.8	0.47499	0	0	0	-	-	-	-	-	-	-	-	-	-	-	-	-	-	0	0
Cd high	7.8	0.47499	0	0	0	-	-	-	-	-	-	-	-	-	-	-	-	-	-	0	0
Cd high	7.9	0.66168	0	0	0	-	-	-	-	-	-	-	-	-	-	-	-	-	-	0	0
Cd high	7.9	0.66168	0	0	0	-	-	-	-	-	-	-	-	-	-	-	-	-	-	0	0
Cd low	8.1	0.8472	0	0	0	-	-	-	-	-	-	-	-	-	-	-	-	-	-	0	0
Cd low	8.1	0.8472	0	0	0	-	-	-	-	-	-	-	-	-	-	-	-	-	-	0	0
Cd low	8.1	0.8472	0	0	0	-	-	-	-	-	-	-	-	-	-	-	-	-	-	0	0
Cd low	8.2	1.03188	0	0	0	-	-	-	-	-	-	-	-	-	-	-	-	-	-	0	0
Cd low	8.2	1.03188	0	0	0	-	-	-	-	-	-	-	-	-	-	-	-	-	-	0	0
Cd low	8.2	1.03188	0	0	0	-	-	-	-	-	-	-	-	-	-	-	-	-	-	0	0
Cd high	8.1	1.03189	0	0	0	-	-	-	-	-	-	-	-	-	-	-	-	-	-	0	0
Cd high	8.1	1.03189	0	0	0	-	-	-	-	-	-	-	-	-	-	-	-	-	-	0	0
Cd high	8.1	1.03189	0	0	0	-	-	-	-	-	-	-	-	-	-	-	-	-	-	0	0
Cd high	8.2	1.03187	0	0	0	-	-	-	-	-	-	-	-	-	-	-	-	-	-	0	0
Pb high	7.7	0.28499	0	0	0	-	-	-	-	-	-	-	-	-	-	-	-	-	-	0	0
Pb high	7.7	0.28499	0	0	0	-	-	-	-	-	-	-	-	-	-	-	-	-	-	0	0
Pb high	7.8	0.47499	0	0	0	-	-	-	-	-	-	-	-	-	-	-	-	-	-	0	0
Pb high	7.8	0.47499	0	0	0	-	-	-	-	-	-	-	-	-	-	-	-	-	-	0	0
Pb low	7.9	0.66168	0	0	0	-	-	-	-	-	-	-	-	-	-	-	-	-	-	0	0
Pb low	7.9	0.66168	0	0	0	-	-	-	-	-	-	-	-	-	-	-	-	-	-	0	0
Pb low	8.2	1.03188	0	0	0	-	-	-	-	-	-	-	-	-	-	-	-	-	-	0	0
Pb low	8.2	1.03188	0	0	0	-	-	-	-	-	-	-	-	-	-	-	-	-	-	0	0
Pb low	8.2	1.03188	0	0	0	-	-	-	-	-	-	-	-	-	-	-	-	-	-	0	0
Pb low	8.1	1.0319	0	0	0	-	-	-	-	-	-	-	-	-	-	-	-	-	-	0	0
Zn low	7.7	0.28693	0	0	0	-	-	-	-	-	-	-	-	-	-	-	-	-	-	0	0
Zn low	7.7	0.28693	0	0	0	-	-	-	-	-	-	-	-	-	-	-	-	-	-	0	0
Zn low	7.7	0.28693	0	0	0	-	-	-	-	-	-	-	-	-	-	-	-	-	-	0	0
Zn low	7.9	0.475	0	0	0	-	-	-	-	-	-	-	-	-	-	-	-	-	-	0	0
Zn low	7.9	0.475	0	0	0	-	-	-	-	-	-	-	-	-	-	-	-	-	-	0	0
Zn low	7.9	0.475	0	0	0	-	-	-	-	-	-	-	-	-	-	-	-	-	-	0	0
Zn high	7.7	0.28501	0	0	0	-	-	-	-	-	-	-	-	-	-	-	-	-	-	0	0
Zn high	7.7	0.28694	0	0	0	-	-	-	-	-	-	-	-	-	-	-	-	-	-	0	0
Zn high	7.8	0.47501	0	0	0	-	-	-	-	-	-	-	-	-	-	-	-	-	-	0	0
Zn high	7.8	0.47501	0	0	0	-	-	-	-	-	-	-	-	-	-	-	-	-	-	0	0
Zn high	7.9	0.6617	0	0	0	-	-	-	-	-	-	-	-	-	-	-	-	-	-	0	0
Zn high	7.9	0.6617	0	0	0	-	-	-	-	-	-	-	-	-	-	-	-	-	-	0	0
Zn low	8.1	0.84721	0	0	0	-	-	-	-	-	-	-	-	-	-	-	-	-	-	0	0
Zn low	8.1	0.84721	0	0	0	-	-	-	-	-	-	-	-	-	-	-	-	-	-	0	0
Zn low	8.1	0.84721	0	0	0	-	-	-	-	-	-	-	-	-	-	-	-	-	-	0	0
Zn low	8.2	1.03189	0	0	0	-	-	-	-	-	-	-	-	-	-	-	-	-	-	0	0
Zn low	8.2	1.03189	0	0	0	-	-	-	-	-	-	-	-	-	-	-	-	-	-	0	0
Zn low	8.2	1.03189	0	0	0	-	-	-	-	-	-	-	-	-	-	-	-	-	-	0	0
Zn high	8.1	1.03192	0	0	0	-	-	-	-	-	-	-	-	-	-	-	-	-	-	0	0
Zn high	8.1	1.03192	0	0	0	-	-	-	-	-	-	-	-	-	-	-	-	-	-	0	0
Zn high	8.1	1.03192	0	0	0	-	-	-	-	-	-	-	-	-	-	-	-	-	-	0	0
Zn high	8.1	1.03192	0	0	0	-	-	-	-	-	-	-	-	-	-	-	-	-	-	0	0
Ni high	7.8	0.28501	1.78543e-05	3.33158e-06	1.77785e-05	3.33158e-06	1.18965e-06	5.27342e-09	4.38061e-11	1.22849e-06	1.6275e-06	1.75963e-06	1.07924e-05	1.7667e-06	7.83132e-09	4.38059e-11	1.82437e-06	1.62749e-06	1.75962e-06	0.00148886	0.00276093
Ni high	7.7	0.28501	1.76353e-05	3.36324e-06	1.75605e-05	3.36324e-06	1.19347e-06	4.22863e-09	2.79024e-11	1.24016e-06	1.64294e-06	1.4022e-06	1.0895e-05	1.77237e-06	6.27975e-09	2.79023e-11	1.84171e-06	1.64294e-06	1.4022e-06	0.00149322	0.00274735
Ni high	7.8	0.47501	1.71855e-05	2.44345e-06	1.71344e-05	2.44345e-06	1.33382e-06	3.86763e-09	3.21283e-11	1.41181e-06	1.64209e-06	1.97286e-06	9.14721e-06	2.12102e-06	6.15027e-09	3.21282e-11	2.24505e-06	1.64209e-06	1.97285e-06	0.00105757	0.00191513
Ni high	7.8	0.47501	1.69535e-05	2.41041e-06	1.69029e-05	2.41041e-06	1.31583e-06	3.81533e-09	3.16938e-11	1.39272e-06	1.61989e-06	1.94626e-06	9.02352e-06	2.09242e-06	6.06711e-09	3.16937e-11	2.21469e-06	1.61989e-06	1.94625e-06	0.00106331	0.00192437
Ni high	7.9	0.6617	1.70903e-05	1.95085e-06	1.70507e-05	1.95085e-06	1.39619e-06	3.88745e-09	4.06544e-11	1.50659e-06	1.60947e-06	2.59982e-06	8.00008e-06	2.32546e-06	6.47485e-09	4.06543e-11	2.50935e-06	1.60947e-06	2.59982e-06	0.000825912	0.0014898
Ni high	7.9	0.6617	1.66941e-05	1.90556e-06	1.66552e-05	1.90556e-06	1.36385e-06	3.7972e-09	3.97106e-11	1.47162e-06	1.57211e-06	2.53961e-06	7.81436e-06	2.2716e-06	6.32454e-09	3.97105e-11	2.45109e-06	1.5721e-06	2.5396e-06	0.000833343	0.00150198
Ni high	8.1	0.84722	1.753e-05	1.58198e-06	1.74976e-05	1.58198e-06	1.37393e-06	4.99624e-09	8.28106e-11	1.51657e-06	1.51932e-06	4.05475e-06	6.92842e-06	2.37016e-06	8.619e-09	8.28105e-11	2.61624e-06	1.51932e-06	4.05474e-06	0.000652878	0.00119626
Ni high	8.1	0.84722	1.76158e-05	1.58974e-06	1.75833e-05	1.58974e-06	1.38065e-06	5.02073e-09	8.32165e-11	1.52401e-06	1.52677e-06	4.07457e-06	6.96238e-06	2.38175e-06	8.66125e-09	8.32164e-11	2.62906e-06	1.52677e-06	4.07457e-06	0.000651732	0.00119429
Ni high	8.1	0.84722	1.7639e-05	1.59183e-06	1.76065e-05	1.59183e-06	1.38246e-06	5.02736e-09	8.33263e-11	1.52602e-06	1.52878e-06	4.07994e-06	6.97157e-06	2.38488e-06	8.67267e-09	8.33261e-11	2.63253e-06	1.52878e-06	4.07993e-06	0.000651423	0.00119376
Ni high	8.2	1.0319	1.74088e-05	1.31218e-06	1.7382e-05	1.31218e-06	1.32114e-06	5.21719e-09	1.08863e-10	1.49479e-06	1.42112e-06	4.90851e-06	6.04644e-06	2.34422e-06	9.25731e-09	1.08862e-10	2.65234e-06	1.42112e-06	4.9085e-06	0.00053998	0.000999948
Ni high	8.2	1.0319	1.69335e-05	1.27631e-06	1.69073e-05	1.27631e-06	1.2851e-06	5.07456e-09	1.05886e-10	1.45393e-06	1.38227e-06	4.77462e-06	5.88113e-06	2.28027e-06	9.00423e-09	1.05886e-10	2.57983e-06	1.38227e-06	4.77461e-06	0.000545011	0.00100887
Ni high	8.2	1.0319	1.7554e-05	1.32315e-06	1.75271e-05	1.32315e-06	1.33216e-06	5.26078e-09	1.09772e-10	1.50728e-06	1.43299e-06	4.94943e-06	6.09695e-06	2.36376e-06	9.33465e-09	1.09772e-10	2.6745e-06	1.43299e-06	4.94942e-06	0.000538473	0.000997276
Ni high	8.2	1.0319	1.7646e-05	1.33008e-06	1.76189e-05	1.33008e-06	1.33913e-06	5.28837e-09	1.10348e-10	1.51519e-06	1.44051e-06	4.97532e-06	6.12893e-06	2.37613e-06	9.38361e-09	1.10348e-10	2.68853e-06	1.44051e-06	4.97532e-06	0.000537526	0.000995599
Sum EC10	7.7	0.28694	7.30172e-06	1.39005e-06	7.28296e-06	1.39005e-06	4.96462e-07	1.74772e-09	1.15323e-11	5.15538e-07	6.8119e-07	5.83292e-07	4.51166e-06	7.37918e-07	2.59773e-09	1.15322e-11	7.66271e-07	6.81187e-07	5.8329e-07	0.000916608	0.00165698
Sum EC10	7.7	0.28694	7.59145e-06	1.44536e-06	7.57254e-06	1.44536e-06	5.16133e-07	1.81727e-09	1.19912e-11	5.36052e-07	7.0829e-07	6.06404e-07	4.69119e-06	7.67157e-07	2.70111e-09	1.19911e-11	7.96763e-07	7.08288e-07	6.06402e-07	0.000887712	0.00160564
Sum EC10	7.7	0.28694	7.56093e-06	1.43955e-06	7.54207e-06	1.43955e-06	5.14062e-07	1.80995e-09	1.19429e-11	5.33894e-07	7.05439e-07	6.0397e-07	4.67231e-06	7.64078e-07	2.69023e-09	1.19429e-11	7.93556e-07	7.05436e-07	6.03968e-07	0.000888819	0.00160791
Sum EC10	7.9	0.47501	7.84566e-06	1.08337e-06	7.83214e-06	1.08337e-06	5.93675e-07	2.15883e-09	2.25767e-11	6.25964e-07	7.2808e-07	1.10548e-06	4.05566e-06	9.44057e-07	3.43295e-09	2.25766e-11	9.95402e-07	7.28078e-07	1.10547e-06	0.000606454	0.00111846
Sum EC10	7.9	0.47501	7.67979e-06	1.06046e-06	7.66663e-06	1.06046e-06	5.81153e-07	2.11318e-09	2.20993e-11	6.12727e-07	7.12685e-07	1.08216e-06	3.96989e-06	9.24144e-07	3.36035e-09	2.20992e-11	9.74353e-07	7.12683e-07	1.08216e-06	0.000602259	0.00111325
Sum EC10	7.9	0.47501	7.71599e-06	1.06544e-06	7.70268e-06	1.06544e-06	5.83894e-07	2.1231e-09	2.22031e-11	6.15605e-07	7.16033e-07	1.08726e-06	3.98854e-06	9.28503e-07	3.37613e-09	2.2203e-11	9.78929e-07	7.16031e-07	1.08726e-06	0.000606501	0.00112103
Sum EC50	7.7	0.28501	7.99584e-06	1.52834e-06	7.98001e-06	1.52834e-06	5.42428e-07	1.92159e-09	1.26795e-11	5.63493e-07	7.46513e-07	6.37298e-07	4.95095e-06	8.05538e-07	2.85368e-09	1.26795e-11	8.3682e-07	7.4651e-07	6.37296e-07	0.00069927	0.00128404
Sum EC50	7.7	0.28501	8.13044e-06	1.55412e-06	8.11454e-06	1.55412e-06	5.51546e-07	1.95401e-09	1.28934e-11	5.72998e-07	7.59102e-07	6.4801e-07	5.03448e-06	8.19078e-07	2.90182e-09	1.28934e-11	8.50935e-07	7.59099e-07	6.48008e-07	0.000690306	0.00126841
Sum EC50	7.8	0.47501	7.78117e-06	1.10807e-06	7.77053e-06	1.10807e-06	6.05005e-07	1.75392e-09	1.45697e-11	6.40188e-07	7.44619e-07	8.94868e-07	4.14813e-06	9.62074e-07	2.78906e-09	1.45697e-11	1.01802e-06	7.44618e-07	8.94866e-07	0.000479074	0.000889816
Sum EC50	7.8	0.47501	7.7948e-06	1.11001e-06	7.78417e-06	1.11001e-06	6.06069e-07	1.75699e-09	1.45953e-11	6.4131e-07	7.45925e-07	8.96441e-07	4.15541e-06	9.63765e-07	2.79395e-09	1.45952e-11	1.01981e-06	7.45923e-07	8.96439e-07	0.000477883	0.000887894
Sum EC50	7.9	0.6617	7.60335e-06	8.68915e-07	7.59515e-06	8.68915e-07	6.22089e-07	1.73149e-09	1.81076e-11	6.71006e-07	7.16837e-07	1.15838e-06	3.56327e-06	1.03614e-06	2.88393e-09	1.81076e-11	1.11761e-06	7.16836e-07	1.15838e-06	0.0003752	0.000704886
Sum EC50	7.9	0.6617	7.74268e-06	8.84886e-07	7.73462e-06	8.84886e-07	6.33486e-07	1.76331e-09	1.84404e-11	6.83339e-07	7.3001e-07	1.17961e-06	3.62876e-06	1.05512e-06	2.93693e-09	1.84404e-11	1.13815e-06	7.30009e-07	1.1796e-06	0.000361594	0.000680931
Sum EC10	8.1	0.84722	8.17761e-06	7.38427e-07	8.16948e-06	7.38427e-07	6.41755e-07	2.33211e-09	3.86538e-11	7.07896e-07	7.09177e-07	1.89395e-06	3.234e-06	1.10709e-06	4.02312e-09	3.86537e-11	1.22119e-06	7.09176e-07	1.89395e-06	0.000347437	0.000648533
Sum EC10	8.1	0.84722	8.28987e-06	7.48577e-07	8.2817e-06	7.48577e-07	6.5056e-07	2.36417e-09	3.91851e-11	7.17626e-07	7.18925e-07	1.91994e-06	3.27845e-06	1.12228e-06	4.07842e-09	3.9185e-11	1.23797e-06	7.18924e-07	1.91994e-06	0.000343751	0.000642932
Sum EC10	8.1	0.84722	8.30196e-06	7.49673e-07	8.29383e-06	7.49673e-07	6.51513e-07	2.36763e-09	3.92425e-11	7.18677e-07	7.19978e-07	1.92275e-06	3.28325e-06	1.12392e-06	4.08439e-09	3.92424e-11	1.23979e-06	7.19977e-07	1.92275e-06	0.000341408	0.000639559
Sum EC10	8.2	1.0319	7.9042e-06	5.96037e-07	7.89766e-06	5.96037e-07	6.00504e-07	2.36982e-09	4.9449e-11	6.78984e-07	6.45518e-07	2.23108e-06	2.74649e-06	1.06553e-06	4.20497e-09	4.94489e-11	1.20478e-06	6.45517e-07	2.23108e-06	0.000290676	0.00053837
Sum EC10	8.2	1.0319	7.65876e-06	5.7751e-07	7.65235e-06	5.7751e-07	5.81869e-07	2.29616e-09	4.79119e-11	6.5788e-07	6.25454e-07	2.16185e-06	2.66112e-06	1.03246e-06	4.07427e-09	4.79119e-11	1.16733e-06	6.25453e-07	2.16185e-06	0.000294432	0.000544119
Sum EC10	8.2	1.0319	7.80805e-06	5.88786e-07	7.80168e-06	5.88786e-07	5.93214e-07	2.34099e-09	4.88475e-11	6.70725e-07	6.37666e-07	2.204e-06	2.71308e-06	1.05259e-06	4.15382e-09	4.88474e-11	1.19013e-06	6.37665e-07	2.204e-06	0.000285994	0.000531638
Sum EC50	8.1	1.03191	7.85457e-06	6.27911e-07	7.84917e-06	6.27911e-07	6.35496e-07	1.98308e-09	3.28687e-11	7.15263e-07	6.79986e-07	1.87548e-06	2.89337e-06	1.12762e-06	3.51876e-09	3.28687e-11	1.26916e-06	6.79985e-07	1.87548e-06	0.000235864	0.000452287
Sum EC50	8.1	1.03191	7.93269e-06	6.34174e-07	7.92734e-06	6.34174e-07	6.41809e-07	2.00286e-09	3.31965e-11	7.22397e-07	6.86766e-07	1.89411e-06	2.92223e-06	1.13882e-06	3.55386e-09	3.31965e-11	1.28181e-06	6.86766e-07	1.89411e-06	0.000231335	0.00044455
Sum EC50	8.1	1.03191	8.18557e-06	6.54398e-07	8.18005e-06	6.54398e-07	6.62258e-07	2.06673e-09	3.42552e-11	7.45431e-07	7.08667e-07	1.95446e-06	3.01542e-06	1.1751e-06	3.66719e-09	3.42551e-11	1.32268e-06	7.08666e-07	1.95446e-06	0.000231392	0.000444624
Sum EC50	8.1	1.03191	8.13466e-06	6.50321e-07	8.12911e-06	6.50321e-07	6.58136e-07	2.05386e-09	3.40418e-11	7.40788e-07	7.04252e-07	1.9423e-06	2.99664e-06	1.16779e-06	3.64434e-09	3.40417e-11	1.31445e-06	7.04251e-07	1.94229e-06	0.000234348	0.000449354
Sum EC10 -Cu	7.7	0.28694	7.28504e-06	1.38621e-06	7.26283e-06	1.38621e-06	4.95085e-07	1.7429e-09	1.15004e-11	5.14114e-07	6.79307e-07	5.81674e-07	4.4992e-06	7.35871e-07	2.59056e-09	1.15004e-11	7.64155e-07	6.79305e-07	5.81672e-07	0.00110074	0.00195174
Sum EC10 -Cu	7.7	0.28694	7.37032e-06	1.40247e-06	7.34794e-06	1.40247e-06	5.00869e-07	1.76334e-09	1.16353e-11	5.20143e-07	6.87274e-07	5.8847e-07	4.55196e-06	7.44469e-07	2.62094e-09	1.16353e-11	7.73117e-07	6.87271e-07	5.88468e-07	0.00109686	0.0019428
Sum EC10 -Cu	7.7	0.28694	7.37372e-06	1.40311e-06	7.35131e-06	1.40311e-06	5.01097e-07	1.76415e-09	1.16406e-11	5.20382e-07	6.8759e-07	5.88738e-07	4.55405e-06	7.44807e-07	2.62215e-09	1.16406e-11	7.73472e-07	6.87588e-07	5.88736e-07	0.00109837	0.00194427
Sum EC10 -Cu	7.9	0.47501	7.64321e-06	1.05483e-06	7.62607e-06	1.05483e-06	5.78104e-07	2.10196e-09	2.1982e-11	6.09476e-07	7.08907e-07	1.07648e-06	3.94882e-06	9.19295e-07	3.34252e-09	2.19819e-11	9.69183e-07	7.08906e-07	1.07648e-06	0.000804355	0.0014404
Sum EC10 -Cu	7.9	0.47501	7.70147e-06	1.06289e-06	7.6843e-06	1.06289e-06	5.82511e-07	2.11802e-09	2.215e-11	6.14133e-07	7.14323e-07	1.08469e-06	3.979e-06	9.26303e-07	3.36806e-09	2.21499e-11	9.76588e-07	7.14321e-07	1.08468e-06	0.000799316	0.0014325
Sum EC10 -Cu	7.9	0.47501	7.68332e-06	1.06039e-06	7.66622e-06	1.06039e-06	5.81138e-07	2.11304e-09	2.20979e-11	6.12689e-07	7.12643e-07	1.08213e-06	3.96964e-06	9.24119e-07	3.36014e-09	2.20978e-11	9.74292e-07	7.12642e-07	1.08213e-06	0.000797774	0.00142948
Sum EC10 -Cu	8.1	0.84722	7.86313e-06	7.09672e-07	7.85171e-06	7.09672e-07	6.1684e-07	2.2413e-09	3.71486e-11	6.80331e-07	6.81566e-07	1.82042e-06	3.10807e-06	1.06411e-06	3.86646e-09	3.71485e-11	1.17364e-06	6.81565e-07	1.82042e-06	0.000520105	0.000933837
Sum EC10 -Cu	8.1	0.84722	8.06484e-06	7.27927e-07	8.05344e-06	7.27927e-07	6.32656e-07	2.29895e-09	3.81041e-11	6.9783e-07	6.99095e-07	1.8671e-06	3.18802e-06	1.09139e-06	3.96591e-09	3.81041e-11	1.20382e-06	6.99094e-07	1.8671e-06	0.000505566	0.000909466
Sum EC10 -Cu	8.1	0.84722	7.96022e-06	7.18453e-07	7.94877e-06	7.18453e-07	6.24454e-07	2.26903e-09	3.76082e-11	6.88748e-07	6.89998e-07	1.84289e-06	3.14652e-06	1.07724e-06	3.91429e-09	3.76081e-11	1.18816e-06	6.89997e-07	1.84289e-06	0.000514698	0.000924989
Sum EC10 -Cu	8.2	1.0319	7.64146e-06	5.76004e-07	7.63245e-06	5.76004e-07	5.80363e-07	2.29017e-09	4.7787e-11	6.56164e-07	6.23824e-07	2.15625e-06	2.65418e-06	1.02979e-06	4.06364e-09	4.77869e-11	1.16429e-06	6.23823e-07	2.15625e-06	0.000420339	0.000759566
Sum EC10 -Cu	8.2	1.0319	7.67966e-06	5.78893e-07	7.67069e-06	5.78893e-07	5.83265e-07	2.30166e-09	4.80267e-11	6.59455e-07	6.26953e-07	2.16703e-06	2.66749e-06	1.03494e-06	4.08403e-09	4.80266e-11	1.17013e-06	6.26952e-07	2.16703e-06	0.000416538	0.000753247
Sum EC10 -Cu	8.2	1.0319	7.69565e-06	5.80095e-07	7.68662e-06	5.80095e-07	5.84477e-07	2.30644e-09	4.81264e-11	6.60825e-07	6.28255e-07	2.17154e-06	2.67303e-06	1.03709e-06	4.09251e-09	4.81264e-11	1.17256e-06	6.28254e-07	2.17154e-06	0.000418194	0.00075598
Sum EC50 -Cu	8.2	1.03189	7.84173e-06	5.9127e-07	7.83391e-06	5.9127e-07	5.95607e-07	2.35087e-09	4.90535e-11	6.73525e-07	6.40344e-07	2.21289e-06	2.72452e-06	1.05684e-06	4.17134e-09	4.90535e-11	1.19509e-06	6.40343e-07	2.21289e-06	0.000351812	0.000646735
Sum EC50 -Cu	8.1	1.03191	7.92458e-06	6.33296e-07	7.9165e-06	6.33296e-07	6.4095e-07	2.00009e-09	3.31506e-11	7.21395e-07	6.85817e-07	1.89158e-06	2.91819e-06	1.13729e-06	3.54894e-09	3.31505e-11	1.28004e-06	6.85816e-07	1.89157e-06	0.000361683	0.000658547
Sum EC50 -Cu	8.1	1.03191	7.98389e-06	6.38026e-07	7.97567e-06	6.38026e-07	6.45744e-07	2.01502e-09	3.33982e-11	7.26786e-07	6.9094e-07	1.90573e-06	2.93998e-06	1.1458e-06	3.57544e-09	3.33981e-11	1.2896e-06	6.90939e-07	1.90572e-06	0.000366077	0.000665802
Sum EC50 -Cu	8.1	1.03191	7.92578e-06	6.33373e-07	7.91757e-06	6.33373e-07	6.41048e-07	2.00033e-09	3.31546e-11	7.21486e-07	6.85902e-07	1.89187e-06	2.91854e-06	1.13747e-06	3.54937e-09	3.31546e-11	1.2802e-06	6.85901e-07	1.89187e-06	0.00036809	0.000669279
Sum EC20	7.7	0.28695	1.10359e-05	2.10246e-06	1.10125e-05	2.10246e-06	7.49758e-07	2.64345e-09	1.74427e-11	7.79748e-07	1.03023e-06	8.80888e-07	6.82398e-06	1.11441e-06	3.92911e-09	1.74426e-11	1.15899e-06	1.03022e-06	8.80886e-07	0.000756471	0.00137056
Sum EC20	7.7	0.28695	1.10868e-05	2.11208e-06	1.1063e-05	2.11208e-06	7.5323e-07	2.65554e-09	1.75225e-11	7.83316e-07	1.03494e-06	8.84968e-07	6.8552e-06	1.11957e-06	3.94709e-09	1.75224e-11	1.16429e-06	1.03494e-06	8.84965e-07	0.00076434	0.00138527
Sum EC20	7.7	0.28695	1.10493e-05	2.10508e-06	1.10261e-05	2.10508e-06	7.50675e-07	2.64673e-09	1.74643e-11	7.80718e-07	1.03151e-06	8.81966e-07	6.83246e-06	1.11577e-06	3.934e-09	1.74643e-11	1.16043e-06	1.03151e-06	8.81963e-07	0.000746904	0.00135411
Sum EC20	7.9	0.47501	1.16607e-05	1.61103e-06	1.16435e-05	1.61103e-06	8.81873e-07	3.21031e-09	3.35729e-11	9.30843e-07	1.08266e-06	1.64212e-06	6.03103e-06	1.40235e-06	5.10501e-09	3.35728e-11	1.48022e-06	1.08265e-06	1.64212e-06	0.000515972	0.000958425
Sum EC20	7.9	0.47501	1.14065e-05	1.57585e-06	1.13895e-05	1.57585e-06	8.62697e-07	3.14019e-09	3.28396e-11	9.10512e-07	1.05901e-06	1.60642e-06	5.8993e-06	1.37185e-06	4.99351e-09	3.28395e-11	1.44789e-06	1.05901e-06	1.60641e-06	0.000522535	0.000970824
Sum EC20	7.9	0.47501	1.16695e-05	1.61226e-06	1.16524e-05	1.61226e-06	8.82553e-07	3.21275e-09	3.35985e-11	9.31551e-07	1.08348e-06	1.64339e-06	6.03562e-06	1.40343e-06	5.1089e-09	3.35984e-11	1.48135e-06	1.08348e-06	1.64339e-06	0.000510836	0.000950108
Sum EC70	7.7	0.28503	1.2274e-05	2.3477e-06	1.22538e-05	2.3477e-06	8.31624e-07	2.95179e-09	1.94772e-11	8.65531e-07	1.14658e-06	9.77073e-07	7.60534e-06	1.23502e-06	4.38361e-09	1.94772e-11	1.28537e-06	1.14657e-06	9.77069e-07	0.000579708	0.00107098
Sum EC70	7.7	0.28503	1.23763e-05	2.36722e-06	1.23557e-05	2.36722e-06	8.38551e-07	2.97633e-09	1.96392e-11	8.72725e-07	1.15611e-06	9.85212e-07	7.66856e-06	1.24531e-06	4.42005e-09	1.96391e-11	1.29605e-06	1.1561e-06	9.85209e-07	0.000584212	0.00107941
Sum EC70	7.8	0.47502	1.17885e-05	1.67959e-06	1.17747e-05	1.67959e-06	9.15862e-07	2.65855e-09	2.20845e-11	9.70346e-07	1.1286e-06	1.35466e-06	6.28769e-06	1.4564e-06	4.22761e-09	2.20844e-11	1.54304e-06	1.12859e-06	1.35466e-06	0.000411165	0.000762364
Sum EC70	7.8	0.47502	1.19231e-05	1.69879e-06	1.19091e-05	1.69879e-06	9.26293e-07	2.68894e-09	2.23369e-11	9.81436e-07	1.14149e-06	1.37009e-06	6.35956e-06	1.47299e-06	4.27594e-09	2.23369e-11	1.56068e-06	1.14149e-06	1.37008e-06	0.000410305	0.00076072
Sum EC70	7.9	0.6617	1.15489e-05	1.32048e-06	1.15384e-05	1.32048e-06	9.4431e-07	2.63133e-09	2.7518e-11	1.01969e-06	1.08931e-06	1.75839e-06	5.41508e-06	1.57282e-06	4.38268e-09	2.75179e-11	1.69838e-06	1.08931e-06	1.75838e-06	0.000317221	0.000595523
Sum EC70	7.9	0.6617	1.16691e-05	1.33426e-06	1.16586e-05	1.33426e-06	9.54107e-07	2.65877e-09	2.7805e-11	1.03033e-06	1.10067e-06	1.77663e-06	5.47157e-06	1.58914e-06	4.4284e-09	2.7805e-11	1.71609e-06	1.10067e-06	1.77663e-06	0.000314208	0.000589755
Sum EC20	8.1	0.84722	1.2194e-05	1.10159e-06	1.21835e-05	1.10159e-06	9.56564e-07	3.47906e-09	5.76638e-11	1.05604e-06	1.05793e-06	2.82302e-06	4.8245e-06	1.65017e-06	6.00171e-09	5.76637e-11	1.82177e-06	1.05793e-06	2.82302e-06	0.000298913	0.000568517
Sum EC20	8.1	0.84722	1.21948e-05	1.10165e-06	1.21842e-05	1.10165e-06	9.56623e-07	3.47927e-09	5.76673e-11	1.0561e-06	1.05799e-06	2.82319e-06	4.8248e-06	1.65027e-06	6.00207e-09	5.76672e-11	1.82188e-06	1.05799e-06	2.82319e-06	0.000298794	0.000568369
Sum EC20	8.1	0.84722	1.23308e-05	1.11395e-06	1.23201e-05	1.11395e-06	9.67289e-07	3.51808e-09	5.83107e-11	1.06789e-06	1.0698e-06	2.85467e-06	4.87863e-06	1.66867e-06	6.06904e-09	5.83106e-11	1.84221e-06	1.0698e-06	2.85467e-06	0.000297959	0.000567254
Sum EC20	8.2	1.0319	1.15723e-05	8.73016e-07	1.15642e-05	8.73016e-07	8.78915e-07	3.47108e-09	7.2428e-11	9.94507e-07	9.45475e-07	3.26548e-06	4.02279e-06	1.55954e-06	6.15904e-09	7.24279e-11	1.76464e-06	9.45473e-07	3.26547e-06	0.000242727	0.000463619
Sum EC20	8.2	1.0319	1.15801e-05	8.73593e-07	1.15718e-05	8.73593e-07	8.79494e-07	3.47337e-09	7.24758e-11	9.95164e-07	9.46099e-07	3.26763e-06	4.02545e-06	1.56056e-06	6.16311e-09	7.24757e-11	1.76581e-06	9.46098e-07	3.26762e-06	0.000246475	0.000469268
Sum EC20	8.2	1.0319	1.15489e-05	8.71231e-07	1.15406e-05	8.71231e-07	8.77139e-07	3.46398e-09	7.22799e-11	9.92474e-07	9.43542e-07	3.25888e-06	4.01457e-06	1.55638e-06	6.14644e-09	7.22798e-11	1.76103e-06	9.43541e-07	3.25888e-06	0.000245595	0.000468274
Sum EC70	8.1	1.03191	1.19383e-05	9.5488e-07	1.19314e-05	9.5488e-07	9.65359e-07	3.01572e-09	4.99842e-11	1.08769e-06	1.03402e-06	2.84898e-06	4.40003e-06	1.71293e-06	5.35107e-09	4.99842e-11	1.92999e-06	1.03402e-06	2.84897e-06	0.00019917	0.00038355
Sum EC70	8.1	1.03192	1.20634e-05	9.64903e-07	1.20564e-05	9.64903e-07	9.75452e-07	3.04737e-09	5.05089e-11	1.09911e-06	1.04487e-06	2.87876e-06	4.44622e-06	1.73083e-06	5.40723e-09	5.05088e-11	1.95024e-06	1.04487e-06	2.87876e-06	0.000198114	0.000381476
Sum EC70	8.1	1.03192	1.16963e-05	9.35498e-07	1.16894e-05	9.35498e-07	9.45818e-07	2.95451e-09	4.89697e-11	1.06562e-06	1.01304e-06	2.79131e-06	4.31072e-06	1.67825e-06	5.24245e-09	4.89696e-11	1.89083e-06	1.01303e-06	2.7913e-06	0.000200484	0.000386121
Sum EC70	8.1	1.03192	1.16801e-05	9.342e-07	1.16732e-05	9.342e-07	9.4451e-07	2.95041e-09	4.89017e-11	1.06414e-06	1.01163e-06	2.78745e-06	4.30474e-06	1.67593e-06	5.23518e-09	4.89017e-11	1.8882e-06	1.01163e-06	2.78744e-06	0.000200945	0.00038695
Cu high	7.9	0.65052	0	0	0	-	-	-	-	-	-	-	-	-	-	-	-	-	-	0	0
Cu high	7.9	0.65423	0	0	0	-	-	-	-	-	-	-	-	-	-	-	-	-	-	0	0
Cu low	7.9	0.66168	0	0	0	-	-	-	-	-	-	-	-	-	-	-	-	-	-	0	0
Cu low	7.9	0.66168	0	0	0	-	-	-	-	-	-	-	-	-	-	-	-	-	-	0	0
Cu high	8	0.65422	0	0	0	-	-	-	-	-	-	-	-	-	-	-	-	-	-	0	0
Cu high	7.9	0.65423	0	0	0	-	-	-	-	-	-	-	-	-	-	-	-	-	-	0	0
Cu low	7.9	0.65423	0	0	0	-	-	-	-	-	-	-	-	-	-	-	-	-	-	0	0
Cu low	7.9	0.65423	0	0	0	-	-	-	-	-	-	-	-	-	-	-	-	-	-	0	0
Cu low	8	0.66168	0	0	0	-	-	-	-	-	-	-	-	-	-	-	-	-	-	0	0
Cu low	8	0.66168	0	0	0	-	-	-	-	-	-	-	-	-	-	-	-	-	-	0	0
Cu high	7.9	0.65423	0	0	0	-	-	-	-	-	-	-	-	-	-	-	-	-	-	0	0
Cu high	7.9	0.65423	0	0	0	-	-	-	-	-	-	-	-	-	-	-	-	-	-	0	0
Cu high	7.9	0.66168	0	0	0	-	-	-	-	-	-	-	-	-	-	-	-	-	-	0	0
Cu high	7.9	0.66168	0	0	0	-	-	-	-	-	-	-	-	-	-	-	-	-	-	0	0
Cu high	7.9	0.65423	0	0	0	-	-	-	-	-	-	-	-	-	-	-	-	-	-	0	0
Cu high	7.9	0.65423	0	0	0	-	-	-	-	-	-	-	-	-	-	-	-	-	-	0	0
Cu high	7.9	0.65423	0	0	0	-	-	-	-	-	-	-	-	-	-	-	-	-	-	0	0
Cu high	7.9	0.65423	0	0	0	-	-	-	-	-	-	-	-	-	-	-	-	-	-	0	0
Cu high	8	0.66168	0	0	0	-	-	-	-	-	-	-	-	-	-	-	-	-	-	0	0
Cu high	8	0.66168	0	0	0	-	-	-	-	-	-	-	-	-	-	-	-	-	-	0	0
Control	7.7	0.27931	0	0	0	-	-	-	-	-	-	-	-	-	-	-	-	-	-	0	0
Control	7.7	0.28315	0	0	0	-	-	-	-	-	-	-	-	-	-	-	-	-	-	0	0
Control	7.7	0.28499	0	0	0	-	-	-	-	-	-	-	-	-	-	-	-	-	-	0	0
Control	7.9	0.34166	0	0	0	-	-	-	-	-	-	-	-	-	-	-	-	-	-	0	0
Control	7.9	0.34166	0	0	0	-	-	-	-	-	-	-	-	-	-	-	-	-	-	0	0
Control	7.9	0.46939	0	0	0	-	-	-	-	-	-	-	-	-	-	-	-	-	-	0	0
Control	7.9	0.47692	0	0	0	-	-	-	-	-	-	-	-	-	-	-	-	-	-	0	0
Control	7.9	0.4731	0	0	0	-	-	-	-	-	-	-	-	-	-	-	-	-	-	0	0
Control	7.9	0.47499	0	0	0	-	-	-	-	-	-	-	-	-	-	-	-	-	-	0	0
Control	7.9	0.47499	0	0	0	-	-	-	-	-	-	-	-	-	-	-	-	-	-	0	0
Control	7.9	0.66168	0	0	0	-	-	-	-	-	-	-	-	-	-	-	-	-	-	0	0
Control	7.9	0.66168	0	0	0	-	-	-	-	-	-	-	-	-	-	-	-	-	-	0	0
Control	8.1	0.8472	0	0	0	-	-	-	-	-	-	-	-	-	-	-	-	-	-	0	0
Control	8.1	0.85095	0	0	0	-	-	-	-	-	-	-	-	-	-	-	-	-	-	0	0
Control	8.1	0.85274	0	0	0	-	-	-	-	-	-	-	-	-	-	-	-	-	-	0	0
Control	8.2	1.0356	0	0	0	-	-	-	-	-	-	-	-	-	-	-	-	-	-	0	0
Control	8.2	1.03926	0	0	0	-	-	-	-	-	-	-	-	-	-	-	-	-	-	0	0
Control	8.2	1.03739	0	0	0	-	-	-	-	-	-	-	-	-	-	-	-	-	-	0	0
Control	8.1	0.65422	0	0	0	-	-	-	-	-	-	-	-	-	-	-	-	-	-	0	0
Control	8.1	0.65422	0	0	0	-	-	-	-	-	-	-	-	-	-	-	-	-	-	0	0
Control	8.1	0.65422	0	0	0	-	-	-	-	-	-	-	-	-	-	-	-	-	-	0	0
Control	8.1	0.65422	0	0	0	-	-	-	-	-	-	-	-	-	-	-	-	-	-	0	0
Control	7.9	0.65793	0	0	0	-	-	-	-	-	-	-	-	-	-	-	-	-	-	0	0
Control	8	0.65792	0	0	0	-	-	-	-	-	-	-	-	-	-	-	-	-	-	0	0
Control	8	0.65422	0	0	0	-	-	-	-	-	-	-	-	-	-	-	-	-	-	0	0
Control	8	0.65422	0	0	0	-	-	-	-	-	-	-	-	-	-	-	-	-	-	0	0
Control	8	0.64864	0	0	0	-	-	-	-	-	-	-	-	-	-	-	-	-	-	0	0
Control	7.9	0.65612	0	0	0	-	-	-	-	-	-	-	-	-	-	-	-	-	-	0	0
Control	8	0.66168	0	0	0	-	-	-	-	-	-	-	-	-	-	-	-	-	-	0	0
Control	8	0.66168	0	0	0	-	-	-	-	-	-	-	-	-	-	-	-	-	-	0	0

## Sheet: Copper
Treatment	pH	Ionic strength (M)	Total (M): Cu	Free ion activity (M): Cu	Total true solution concentration (M): Cu	Total aqueous concentration (M): Cu	Activity (M): Cu[2+]	Activity (M): CuOH[+]	Activity (M): Cu(OH)2[0]	Activity (M): CuSO4[0]	Activity (M): CuHCO3[+]	Activity (M): CuCl[+]	Activity (M): CuCO3[0]	Activity (M): Cu(CO3)2[2-]	Aqueous concentration (M): Cu[2+]	Aqueous concentration (M): CuOH[+]	Aqueous concentration (M): Cu(OH)2[0]	Aqueous concentration (M): CuSO4[0]	Aqueous concentration (M): CuHCO3[+]	Aqueous concentration (M): CuCl[+]	Aqueous concentration (M): CuCO3[0]	Aqueous concentration (M): Cu(CO3)2[2-]	Fraction bound to colloidal HA : Cu	Fraction bound to colloidal FA : Cu
Cu high	7.7	0.28499	7.59743e-08	1.13735e-09	1.94729e-08	7.59743e-08	1.13735e-09	3.1285e-10	5.68562e-12	5.64311e-10	6.56975e-09	3.64385e-10	4.4417e-09	4.56251e-12	3.68428e-09	4.64595e-10	5.6856e-12	5.6431e-10	9.75636e-09	5.41127e-10	4.44168e-09	1.47796e-11	0.23838	0.50531
Cu high	7.7	0.28499	8.3923e-08	1.35038e-09	2.31201e-08	8.3923e-08	1.35038e-09	3.71447e-10	6.75054e-12	6.70007e-10	7.80024e-09	4.32634e-10	5.27361e-09	5.41704e-12	4.37435e-09	5.51614e-10	6.75052e-12	6.70005e-10	1.15837e-08	6.4248e-10	5.2736e-09	1.75477e-11	0.2295	0.495
Cu high	7.7	0.47499	8.03742e-08	1.16068e-09	2.98423e-08	8.03742e-08	1.16068e-09	3.19268e-10	5.80227e-12	7.92198e-10	1.02478e-08	5.82681e-10	6.92835e-09	1.08779e-11	4.34505e-09	5.07695e-10	5.80225e-12	7.92196e-10	1.62958e-08	9.26569e-10	6.92833e-09	4.07218e-11	0.20499	0.42372
Cu high	7.8	0.47499	8.453e-08	1.16556e-09	3.20688e-08	8.453e-08	1.16556e-09	4.03625e-10	9.23464e-12	7.95543e-10	1.0348e-08	5.8513e-10	8.80758e-09	1.75056e-11	4.36332e-09	6.41837e-10	9.23462e-12	7.95541e-10	1.64552e-08	9.30465e-10	8.80756e-09	6.55328e-11	0.19994	0.42068
Cu high	7.9	0.66168	8.64618e-08	9.99714e-10	3.87982e-08	8.64618e-08	9.99714e-10	4.35831e-10	1.25534e-11	8.3764e-10	1.16319e-08	6.70797e-10	1.24638e-08	4.08719e-11	4.09963e-09	7.25908e-10	1.25533e-11	8.37638e-10	1.93738e-08	1.11726e-09	1.24638e-08	1.67608e-10	0.17965	0.37162
Cu high	7.9	0.66168	9.58615e-08	1.16471e-09	4.52015e-08	9.58615e-08	1.16471e-09	5.07762e-10	1.46252e-11	9.75887e-10	1.35516e-08	7.81508e-10	1.45208e-08	4.76174e-11	4.77625e-09	8.45715e-10	1.46252e-11	9.75886e-10	2.25712e-08	1.30166e-09	1.45208e-08	1.95269e-10	0.17004	0.35843
Cu high	8.1	1.0319	9.76166e-08	8.05423e-10	5.37718e-08	9.76166e-08	8.05423e-10	5.56501e-10	2.54043e-11	8.85822e-10	1.32425e-08	7.97169e-10	2.24889e-08	1.65163e-10	3.71133e-09	9.87449e-10	2.54043e-11	8.85821e-10	2.34973e-08	1.41449e-09	2.24889e-08	7.61061e-10	0.14644	0.30272
Cu high	8.1	1.0319	8.83311e-08	6.99389e-10	4.66929e-08	8.83311e-08	6.99389e-10	4.83238e-10	2.20599e-11	7.69204e-10	1.14991e-08	6.92223e-10	1.95283e-08	1.4342e-10	3.22274e-09	8.57452e-10	2.20599e-11	7.69203e-10	2.04039e-08	1.22827e-09	1.95283e-08	6.6087e-10	0.1554	0.31599
Cu high	8.1	1.0319	8.67521e-08	6.81513e-10	4.54994e-08	8.67521e-08	6.81513e-10	4.70887e-10	2.1496e-11	7.49544e-10	1.12052e-08	6.74529e-10	1.90292e-08	1.39755e-10	3.14037e-09	8.35536e-10	2.1496e-11	7.49543e-10	1.98824e-08	1.19688e-09	1.90292e-08	6.43979e-10	0.15707	0.31845
Cu high	8.1	1.0319	8.3592e-08	6.45885e-10	4.31208e-08	8.3592e-08	6.45885e-10	4.4627e-10	2.03723e-11	7.10359e-10	1.06194e-08	6.39267e-10	1.80344e-08	1.32449e-10	2.97619e-09	7.91856e-10	2.03722e-11	7.10358e-10	1.8843e-08	1.13431e-09	1.80344e-08	6.10314e-10	0.16056	0.32359
Cd low	7.7	0.28692	0	0	0	0	-	-	-	-	-	-	-	-	-	-	-	-	-	-	-	-	0	0
Cd low	7.7	0.28692	0	0	0	0	-	-	-	-	-	-	-	-	-	-	-	-	-	-	-	-	0	0
Cd low	7.7	0.28692	0	0	0	0	-	-	-	-	-	-	-	-	-	-	-	-	-	-	-	-	0	0
Cd low	7.9	0.47499	0	0	0	0	-	-	-	-	-	-	-	-	-	-	-	-	-	-	-	-	0	0
Cd low	8	0.47499	0	0	0	0	-	-	-	-	-	-	-	-	-	-	-	-	-	-	-	-	0	0
Cd low	8	0.47499	0	0	0	0	-	-	-	-	-	-	-	-	-	-	-	-	-	-	-	-	0	0
Cd high	7.7	0.28499	0	0	0	0	-	-	-	-	-	-	-	-	-	-	-	-	-	-	-	-	0	0
Cd high	7.7	0.28499	0	0	0	0	-	-	-	-	-	-	-	-	-	-	-	-	-	-	-	-	0	0
Cd high	7.8	0.47499	0	0	0	0	-	-	-	-	-	-	-	-	-	-	-	-	-	-	-	-	0	0
Cd high	7.8	0.47499	0	0	0	0	-	-	-	-	-	-	-	-	-	-	-	-	-	-	-	-	0	0
Cd high	7.9	0.66168	0	0	0	0	-	-	-	-	-	-	-	-	-	-	-	-	-	-	-	-	0	0
Cd high	7.9	0.66168	0	0	0	0	-	-	-	-	-	-	-	-	-	-	-	-	-	-	-	-	0	0
Cd low	8.1	0.8472	0	0	0	0	-	-	-	-	-	-	-	-	-	-	-	-	-	-	-	-	0	0
Cd low	8.1	0.8472	0	0	0	0	-	-	-	-	-	-	-	-	-	-	-	-	-	-	-	-	0	0
Cd low	8.1	0.8472	0	0	0	0	-	-	-	-	-	-	-	-	-	-	-	-	-	-	-	-	0	0
Cd low	8.2	1.03188	0	0	0	0	-	-	-	-	-	-	-	-	-	-	-	-	-	-	-	-	0	0
Cd low	8.2	1.03188	0	0	0	0	-	-	-	-	-	-	-	-	-	-	-	-	-	-	-	-	0	0
Cd low	8.2	1.03188	0	0	0	0	-	-	-	-	-	-	-	-	-	-	-	-	-	-	-	-	0	0
Cd high	8.1	1.03189	0	0	0	0	-	-	-	-	-	-	-	-	-	-	-	-	-	-	-	-	0	0
Cd high	8.1	1.03189	0	0	0	0	-	-	-	-	-	-	-	-	-	-	-	-	-	-	-	-	0	0
Cd high	8.1	1.03189	0	0	0	0	-	-	-	-	-	-	-	-	-	-	-	-	-	-	-	-	0	0
Cd high	8.2	1.03187	0	0	0	0	-	-	-	-	-	-	-	-	-	-	-	-	-	-	-	-	0	0
Pb high	7.7	0.28499	0	0	0	0	-	-	-	-	-	-	-	-	-	-	-	-	-	-	-	-	0	0
Pb high	7.7	0.28499	0	0	0	0	-	-	-	-	-	-	-	-	-	-	-	-	-	-	-	-	0	0
Pb high	7.8	0.47499	0	0	0	0	-	-	-	-	-	-	-	-	-	-	-	-	-	-	-	-	0	0
Pb high	7.8	0.47499	0	0	0	0	-	-	-	-	-	-	-	-	-	-	-	-	-	-	-	-	0	0
Pb low	7.9	0.66168	0	0	0	0	-	-	-	-	-	-	-	-	-	-	-	-	-	-	-	-	0	0
Pb low	7.9	0.66168	0	0	0	0	-	-	-	-	-	-	-	-	-	-	-	-	-	-	-	-	0	0
Pb low	8.2	1.03188	0	0	0	0	-	-	-	-	-	-	-	-	-	-	-	-	-	-	-	-	0	0
Pb low	8.2	1.03188	0	0	0	0	-	-	-	-	-	-	-	-	-	-	-	-	-	-	-	-	0	0
Pb low	8.2	1.03188	0	0	0	0	-	-	-	-	-	-	-	-	-	-	-	-	-	-	-	-	0	0
Pb low	8.1	1.0319	0	0	0	0	-	-	-	-	-	-	-	-	-	-	-	-	-	-	-	-	0	0
Zn low	7.7	0.28693	0	0	0	0	-	-	-	-	-	-	-	-	-	-	-	-	-	-	-	-	0	0
Zn low	7.7	0.28693	0	0	0	0	-	-	-	-	-	-	-	-	-	-	-	-	-	-	-	-	0	0
Zn low	7.7	0.28693	0	0	0	0	-	-	-	-	-	-	-	-	-	-	-	-	-	-	-	-	0	0
Zn low	7.9	0.475	0	0	0	0	-	-	-	-	-	-	-	-	-	-	-	-	-	-	-	-	0	0
Zn low	7.9	0.475	0	0	0	0	-	-	-	-	-	-	-	-	-	-	-	-	-	-	-	-	0	0
Zn low	7.9	0.475	0	0	0	0	-	-	-	-	-	-	-	-	-	-	-	-	-	-	-	-	0	0
Zn high	7.7	0.28501	0	0	0	0	-	-	-	-	-	-	-	-	-	-	-	-	-	-	-	-	0	0
Zn high	7.7	0.28694	0	0	0	0	-	-	-	-	-	-	-	-	-	-	-	-	-	-	-	-	0	0
Zn high	7.8	0.47501	0	0	0	0	-	-	-	-	-	-	-	-	-	-	-	-	-	-	-	-	0	0
Zn high	7.8	0.47501	0	0	0	0	-	-	-	-	-	-	-	-	-	-	-	-	-	-	-	-	0	0
Zn high	7.9	0.6617	0	0	0	0	-	-	-	-	-	-	-	-	-	-	-	-	-	-	-	-	0	0
Zn high	7.9	0.6617	0	0	0	0	-	-	-	-	-	-	-	-	-	-	-	-	-	-	-	-	0	0
Zn low	8.1	0.84721	0	0	0	0	-	-	-	-	-	-	-	-	-	-	-	-	-	-	-	-	0	0
Zn low	8.1	0.84721	0	0	0	0	-	-	-	-	-	-	-	-	-	-	-	-	-	-	-	-	0	0
Zn low	8.1	0.84721	0	0	0	0	-	-	-	-	-	-	-	-	-	-	-	-	-	-	-	-	0	0
Zn low	8.2	1.03189	0	0	0	0	-	-	-	-	-	-	-	-	-	-	-	-	-	-	-	-	0	0
Zn low	8.2	1.03189	0	0	0	0	-	-	-	-	-	-	-	-	-	-	-	-	-	-	-	-	0	0
Zn low	8.2	1.03189	0	0	0	0	-	-	-	-	-	-	-	-	-	-	-	-	-	-	-	-	0	0
Zn high	8.1	1.03192	0	0	0	0	-	-	-	-	-	-	-	-	-	-	-	-	-	-	-	-	0	0
Zn high	8.1	1.03192	0	0	0	0	-	-	-	-	-	-	-	-	-	-	-	-	-	-	-	-	0	0
Zn high	8.1	1.03192	0	0	0	0	-	-	-	-	-	-	-	-	-	-	-	-	-	-	-	-	0	0
Zn high	8.1	1.03192	0	0	0	0	-	-	-	-	-	-	-	-	-	-	-	-	-	-	-	-	0	0
Ni high	7.8	0.28501	0	0	0	0	-	-	-	-	-	-	-	-	-	-	-	-	-	-	-	-	0	0
Ni high	7.7	0.28501	0	0	0	0	-	-	-	-	-	-	-	-	-	-	-	-	-	-	-	-	0	0
Ni high	7.8	0.47501	0	0	0	0	-	-	-	-	-	-	-	-	-	-	-	-	-	-	-	-	0	0
Ni high	7.8	0.47501	0	0	0	0	-	-	-	-	-	-	-	-	-	-	-	-	-	-	-	-	0	0
Ni high	7.9	0.6617	0	0	0	0	-	-	-	-	-	-	-	-	-	-	-	-	-	-	-	-	0	0
Ni high	7.9	0.6617	0	0	0	0	-	-	-	-	-	-	-	-	-	-	-	-	-	-	-	-	0	0
Ni high	8.1	0.84722	0	0	0	0	-	-	-	-	-	-	-	-	-	-	-	-	-	-	-	-	0	0
Ni high	8.1	0.84722	0	0	0	0	-	-	-	-	-	-	-	-	-	-	-	-	-	-	-	-	0	0
Ni high	8.1	0.84722	0	0	0	0	-	-	-	-	-	-	-	-	-	-	-	-	-	-	-	-	0	0
Ni high	8.2	1.0319	0	0	0	0	-	-	-	-	-	-	-	-	-	-	-	-	-	-	-	-	0	0
Ni high	8.2	1.0319	0	0	0	0	-	-	-	-	-	-	-	-	-	-	-	-	-	-	-	-	0	0
Ni high	8.2	1.0319	0	0	0	0	-	-	-	-	-	-	-	-	-	-	-	-	-	-	-	-	0	0
Ni high	8.2	1.0319	0	0	0	0	-	-	-	-	-	-	-	-	-	-	-	-	-	-	-	-	0	0
Sum EC10	7.7	0.28694	3.76045e-08	6.3811e-10	1.09595e-08	3.76045e-08	6.3811e-10	1.75525e-10	3.18992e-12	3.17561e-10	3.69616e-09	2.0562e-10	2.49891e-09	2.57399e-12	2.0711e-09	2.60892e-10	3.18991e-12	3.1756e-10	5.49381e-09	3.05623e-10	2.49891e-09	8.35434e-12	0.23471	0.47385
Sum EC10	7.7	0.28694	4.04519e-08	7.25063e-10	1.24514e-08	4.04519e-08	7.25063e-10	1.99443e-10	3.6246e-12	3.60831e-10	4.19914e-09	2.33638e-10	2.83897e-09	2.92378e-12	2.35332e-09	2.96442e-10	3.62459e-12	3.60829e-10	6.24141e-09	3.47269e-10	2.83896e-09	9.48966e-12	0.2288	0.46339
Sum EC10	7.7	0.28694	4.03518e-08	7.21633e-10	1.23926e-08	4.03518e-08	7.21633e-10	1.98499e-10	3.60745e-12	3.59124e-10	4.17933e-09	2.32533e-10	2.82557e-09	2.91002e-12	2.34219e-09	2.9504e-10	3.60744e-12	3.59122e-10	6.21196e-09	3.45626e-10	2.82556e-09	9.44501e-12	0.22902	0.46387
Sum EC10	7.9	0.47501	4.13819e-08	4.98439e-10	1.47912e-08	4.13819e-08	4.98439e-10	2.17297e-10	6.25887e-12	3.4018e-10	4.42981e-09	2.50221e-10	4.74663e-09	1.18894e-11	1.86594e-09	3.45544e-10	6.25886e-12	3.40179e-10	7.04424e-09	3.97899e-10	4.74662e-09	4.45086e-11	0.211	0.43156
Sum EC10	7.9	0.47501	4.4463e-08	5.47192e-10	1.62387e-08	4.4463e-08	5.47192e-10	2.38551e-10	6.87106e-12	3.73454e-10	4.86336e-09	2.74696e-10	5.21119e-09	1.30537e-11	2.04845e-09	3.79342e-10	6.87104e-12	3.73453e-10	7.73367e-09	4.36818e-10	5.21117e-09	4.88673e-11	0.20819	0.42659
Sum EC10	7.9	0.47501	4.36884e-08	5.31234e-10	1.57654e-08	4.36884e-08	5.31234e-10	2.31595e-10	6.67069e-12	3.62564e-10	4.72163e-09	2.66685e-10	5.05932e-09	1.26735e-11	1.98871e-09	3.68279e-10	6.67067e-12	3.62563e-10	7.50829e-09	4.2408e-10	5.0593e-09	4.74441e-11	0.20974	0.4294
Sum EC50	7.7	0.28501	8.96987e-08	2.39216e-09	4.08514e-08	8.96987e-08	2.39216e-09	6.58009e-10	1.19584e-11	1.18659e-09	1.37693e-08	7.66299e-10	9.30922e-09	9.52877e-12	7.74925e-09	9.77182e-10	1.19584e-11	1.18659e-09	2.04483e-08	1.138e-09	9.30919e-09	3.08679e-11	0.17509	0.36948
Sum EC50	7.7	0.28501	9.44197e-08	2.5676e-09	4.38455e-08	9.44197e-08	2.5676e-09	7.06267e-10	1.28355e-11	1.27361e-09	1.47783e-08	8.22496e-10	9.99135e-09	1.02264e-11	8.31758e-09	1.04885e-09	1.28354e-11	1.27361e-09	2.19466e-08	1.22146e-09	9.99131e-09	3.31277e-11	0.17197	0.36366
Sum EC50	7.8	0.47501	9.28461e-08	1.75642e-09	4.82259e-08	9.28461e-08	1.75642e-09	6.08234e-10	1.39159e-11	1.19864e-09	1.55532e-08	8.81673e-10	1.32379e-08	2.62429e-11	6.57528e-09	9.67208e-10	1.39159e-11	1.19864e-09	2.47326e-08	1.40203e-09	1.32379e-08	9.82423e-11	0.15345	0.32713
Sum EC50	7.8	0.47501	9.44198e-08	1.79393e-09	4.92561e-08	9.44198e-08	1.79393e-09	6.21224e-10	1.42131e-11	1.22424e-09	1.58855e-08	9.00502e-10	1.35207e-08	2.68036e-11	6.71571e-09	9.87865e-10	1.42131e-11	1.22424e-09	2.52609e-08	1.43197e-09	1.35207e-08	1.00341e-10	0.15261	0.32573
Sum EC50	7.9	0.6617	8.24498e-08	1.14129e-09	4.42165e-08	8.24498e-08	1.14129e-09	4.97551e-10	1.43311e-11	9.56165e-10	1.32517e-08	7.65744e-10	1.41994e-08	4.64671e-11	4.68023e-09	8.2871e-10	1.43311e-11	9.56163e-10	2.20717e-08	1.27541e-09	1.41994e-08	1.90554e-10	0.1487	0.31502
Sum EC50	7.9	0.6617	9.82613e-08	1.43309e-09	5.55189e-08	9.82613e-08	1.43309e-09	6.24763e-10	1.79952e-11	1.20063e-09	1.66388e-08	9.61525e-10	1.78288e-08	5.83408e-11	5.87685e-09	1.04059e-09	1.79952e-11	1.20063e-09	2.77132e-08	1.60149e-09	1.78288e-08	2.39245e-10	0.13835	0.29664
Sum EC10	8.1	0.84722	4.7758e-08	3.7054e-10	2.10937e-08	4.7758e-08	3.7054e-10	2.56022e-10	1.16874e-11	3.6139e-10	5.22272e-09	3.08628e-10	8.86945e-09	5.58416e-11	1.62281e-09	4.41662e-10	1.16874e-11	3.61389e-10	9.00969e-09	5.32413e-10	8.86943e-09	2.44563e-10	0.18325	0.37508
Sum EC10	8.1	0.84722	4.98256e-08	3.93438e-10	2.23967e-08	4.98256e-08	3.93438e-10	2.71843e-10	1.24097e-11	3.83722e-10	5.54533e-09	3.277e-10	9.41732e-09	5.92896e-11	1.72309e-09	4.68955e-10	1.24097e-11	3.83722e-10	9.56622e-09	5.65314e-10	9.41731e-09	2.59664e-10	0.18048	0.37001
Sum EC10	8.1	0.84722	5.1556e-08	4.12113e-10	2.34598e-08	5.1556e-08	4.12113e-10	2.84746e-10	1.29987e-11	4.01936e-10	5.80855e-09	3.43255e-10	9.86433e-09	6.21039e-11	1.80488e-09	4.91215e-10	1.29987e-11	4.01936e-10	1.00203e-08	5.92148e-10	9.86431e-09	2.71989e-10	0.17854	0.36642
Sum EC10	8.2	1.0319	4.0113e-08	2.34073e-10	1.74298e-08	4.0113e-08	2.34073e-10	2.03607e-10	1.17013e-11	2.57443e-10	3.82467e-09	2.31674e-10	8.177e-09	7.5134e-11	1.07859e-09	3.61278e-10	1.17013e-11	2.57442e-10	6.78644e-09	4.11079e-10	8.17699e-09	3.46212e-10	0.18518	0.38031
Sum EC10	8.2	1.0319	3.91407e-08	2.24642e-10	1.67283e-08	3.91407e-08	2.24642e-10	1.95404e-10	1.12299e-11	2.4707e-10	3.67076e-09	2.22339e-10	7.84795e-09	7.21145e-11	1.03513e-09	3.46721e-10	1.12298e-11	2.4707e-10	6.51335e-09	3.94516e-10	7.84794e-09	3.32298e-10	0.18774	0.38487
Sum EC10	8.2	1.0319	4.37408e-08	2.62749e-10	1.95655e-08	4.37408e-08	2.62749e-10	2.28551e-10	1.31349e-11	2.88982e-10	4.29334e-09	2.60056e-10	9.179e-09	8.4343e-11	1.21073e-09	4.05538e-10	1.31349e-11	2.88982e-10	7.61805e-09	4.6144e-10	9.17899e-09	3.88646e-10	0.18108	0.37161
Sum EC50	8.1	1.03191	9.43201e-08	8.57469e-10	5.71614e-08	9.43201e-08	8.57469e-10	5.92462e-10	2.7046e-11	9.43004e-10	1.40745e-08	8.48642e-10	2.39019e-08	1.75246e-10	3.95116e-09	1.05126e-09	2.70459e-11	9.43003e-10	2.49736e-08	1.50582e-09	2.39019e-08	8.07521e-10	0.12556	0.2684
Sum EC50	8.1	1.03191	1.01434e-07	9.41952e-10	6.27911e-08	1.01434e-07	9.41952e-10	6.50835e-10	2.97107e-11	1.03591e-09	1.54606e-08	9.32254e-10	2.62558e-08	1.92497e-10	4.34045e-09	1.15483e-09	2.97107e-11	1.03591e-09	2.74331e-08	1.65418e-09	2.62558e-08	8.87012e-10	0.1209	0.26006
Sum EC50	8.1	1.03191	1.01023e-07	9.37391e-10	6.24856e-08	1.01023e-07	9.37391e-10	6.47684e-10	2.95669e-11	1.0309e-09	1.53853e-08	9.27738e-10	2.6128e-08	1.91554e-10	4.31944e-09	1.14924e-09	2.95668e-11	1.0309e-09	2.72995e-08	1.64617e-09	2.6128e-08	8.8267e-10	0.12107	0.2604
Sum EC50	8.1	1.03191	9.46858e-08	8.64592e-10	5.76331e-08	9.46858e-08	8.64592e-10	5.97383e-10	2.72706e-11	9.50835e-10	1.41905e-08	8.55688e-10	2.4099e-08	1.76679e-10	3.98398e-09	1.05999e-09	2.72706e-11	9.50834e-10	2.51795e-08	1.51832e-09	2.40989e-08	8.14127e-10	0.12461	0.26672
Sum EC10 -Cu	7.7	0.28694	0	0	0	0	-	-	-	-	-	-	-	-	-	-	-	-	-	-	-	-	0	0
Sum EC10 -Cu	7.7	0.28694	0	0	0	0	-	-	-	-	-	-	-	-	-	-	-	-	-	-	-	-	0	0
Sum EC10 -Cu	7.7	0.28694	0	0	0	0	-	-	-	-	-	-	-	-	-	-	-	-	-	-	-	-	0	0
Sum EC10 -Cu	7.9	0.47501	0	0	0	0	-	-	-	-	-	-	-	-	-	-	-	-	-	-	-	-	0	0
Sum EC10 -Cu	7.9	0.47501	0	0	0	0	-	-	-	-	-	-	-	-	-	-	-	-	-	-	-	-	0	0
Sum EC10 -Cu	7.9	0.47501	0	0	0	0	-	-	-	-	-	-	-	-	-	-	-	-	-	-	-	-	0	0
Sum EC10 -Cu	8.1	0.84722	0	0	0	0	-	-	-	-	-	-	-	-	-	-	-	-	-	-	-	-	0	0
Sum EC10 -Cu	8.1	0.84722	0	0	0	0	-	-	-	-	-	-	-	-	-	-	-	-	-	-	-	-	0	0
Sum EC10 -Cu	8.1	0.84722	0	0	0	0	-	-	-	-	-	-	-	-	-	-	-	-	-	-	-	-	0	0
Sum EC10 -Cu	8.2	1.0319	0	0	0	0	-	-	-	-	-	-	-	-	-	-	-	-	-	-	-	-	0	0
Sum EC10 -Cu	8.2	1.0319	0	0	0	0	-	-	-	-	-	-	-	-	-	-	-	-	-	-	-	-	0	0
Sum EC10 -Cu	8.2	1.0319	0	0	0	0	-	-	-	-	-	-	-	-	-	-	-	-	-	-	-	-	0	0
Sum EC50 -Cu	8.2	1.03189	0	0	0	0	-	-	-	-	-	-	-	-	-	-	-	-	-	-	-	-	0	0
Sum EC50 -Cu	8.1	1.03191	0	0	0	0	-	-	-	-	-	-	-	-	-	-	-	-	-	-	-	-	0	0
Sum EC50 -Cu	8.1	1.03191	0	0	0	0	-	-	-	-	-	-	-	-	-	-	-	-	-	-	-	-	0	0
Sum EC50 -Cu	8.1	1.03191	0	0	0	0	-	-	-	-	-	-	-	-	-	-	-	-	-	-	-	-	0	0
Sum EC20	7.7	0.28695	5.48852e-08	1.24504e-09	2.13596e-08	5.48852e-08	1.24504e-09	3.42472e-10	6.22397e-12	6.19558e-10	7.20072e-09	4.01188e-10	4.86828e-09	5.00689e-12	4.04103e-09	5.09037e-10	6.22395e-12	6.19556e-10	1.07029e-08	5.9631e-10	4.86827e-09	1.62509e-11	0.20003	0.4108
Sum EC20	7.7	0.28695	5.34003e-08	1.19158e-09	2.04433e-08	5.34003e-08	1.19158e-09	3.27768e-10	5.95674e-12	5.92957e-10	6.89193e-09	3.83963e-10	4.65952e-09	4.79245e-12	3.86753e-09	4.87181e-10	5.95672e-12	5.92956e-10	1.02439e-08	5.70706e-10	4.6595e-09	1.55549e-11	0.2021	0.41507
Sum EC20	7.7	0.28695	6.0105e-08	1.40482e-09	2.41004e-08	6.0105e-08	1.40482e-09	3.86423e-10	7.02272e-12	6.99069e-10	8.12466e-09	4.52675e-10	5.49294e-09	5.64923e-12	4.55964e-09	5.74364e-10	7.0227e-12	6.99067e-10	1.20762e-08	6.72837e-10	5.49293e-09	1.83357e-11	0.19588	0.40315
Sum EC20	7.9	0.47501	6.6631e-08	1.03057e-09	3.05556e-08	6.6631e-08	1.03057e-09	4.49283e-10	1.29408e-11	7.03328e-10	9.14911e-09	5.17354e-10	9.80345e-09	2.4529e-11	3.85802e-09	7.14446e-10	1.29408e-11	7.03326e-10	1.45489e-08	8.22693e-10	9.80343e-09	9.18263e-11	0.17425	0.36717
Sum EC20	7.9	0.47501	6.44211e-08	9.79031e-10	2.90298e-08	6.44211e-08	9.79031e-10	4.26814e-10	1.22936e-11	6.68156e-10	8.69242e-09	4.91481e-10	9.3141e-09	2.33069e-11	3.66508e-09	6.78717e-10	1.22936e-11	6.68155e-10	1.38226e-08	7.8155e-10	9.31408e-09	8.72513e-11	0.17701	0.37236
Sum EC20	7.9	0.47501	7.12815e-08	1.125e-09	3.33558e-08	7.12815e-08	1.125e-09	4.90452e-10	1.41266e-11	7.67775e-10	9.98757e-09	5.64761e-10	1.07019e-08	2.67772e-11	4.21154e-09	7.79913e-10	1.41266e-11	7.67774e-10	1.58822e-08	8.98079e-10	1.07019e-08	1.00243e-10	0.17081	0.36124
Sum EC70	7.7	0.28503	1.43203e-07	4.72043e-09	8.04981e-08	1.43203e-07	4.72043e-09	1.29844e-09	2.35975e-11	2.34118e-09	2.71184e-08	1.51203e-09	1.83343e-08	1.87304e-11	1.52917e-08	1.92828e-09	2.35974e-11	2.34117e-09	4.02727e-08	2.24546e-09	1.83343e-08	6.06769e-11	0.13983	0.29804
Sum EC70	7.7	0.28503	1.36909e-07	4.46124e-09	7.60792e-08	1.36909e-07	4.46124e-09	1.22715e-09	2.23018e-11	2.21263e-09	2.56299e-08	1.429e-09	1.73279e-08	1.77026e-11	1.44521e-08	1.8224e-09	2.23017e-11	2.21262e-09	3.80621e-08	2.12217e-09	1.73279e-08	5.73474e-11	0.14191	0.3024
Sum EC70	7.8	0.47502	1.40056e-07	3.10219e-09	8.50891e-08	1.40056e-07	3.10219e-09	1.07426e-09	2.45784e-11	2.11689e-09	2.74344e-08	1.55715e-09	2.33505e-08	4.62299e-11	1.16133e-08	1.70829e-09	2.45783e-11	2.11689e-09	4.36261e-08	2.47618e-09	2.33504e-08	1.73066e-10	0.12395	0.26852
Sum EC70	7.8	0.47502	1.40056e-07	3.106e-09	8.51907e-08	1.40056e-07	3.106e-09	1.07558e-09	2.46085e-11	2.11948e-09	2.7467e-08	1.55906e-09	2.33782e-08	4.62829e-11	1.16276e-08	1.71038e-09	2.46084e-11	2.11948e-09	4.36778e-08	2.47921e-09	2.33781e-08	1.73264e-10	0.12373	0.26801
Sum EC70	7.9	0.6617	1.34557e-07	2.21131e-09	8.55914e-08	1.34557e-07	2.21131e-09	9.64034e-10	2.77673e-11	1.85252e-09	2.56467e-08	1.48363e-09	2.7481e-08	8.98285e-11	9.06823e-09	1.60567e-09	2.77673e-11	1.85252e-09	4.27167e-08	2.4711e-09	2.74809e-08	3.68372e-10	0.11424	0.24966
Sum EC70	7.9	0.6617	1.39158e-07	2.30761e-09	8.93146e-08	1.39158e-07	2.30761e-09	1.00601e-09	2.89765e-11	1.93319e-09	2.67621e-08	1.54823e-09	2.86761e-08	9.373e-11	9.46313e-09	1.6756e-09	2.89765e-11	1.93318e-09	4.45744e-08	2.57871e-09	2.86761e-08	3.84371e-10	0.11233	0.24585
Sum EC20	8.1	0.84722	7.21263e-08	6.80556e-10	3.87135e-08	7.21263e-08	6.80556e-10	4.70225e-10	2.14659e-11	6.63735e-10	9.58426e-09	5.66844e-10	1.62764e-08	1.02389e-10	2.98056e-09	8.11185e-10	2.14658e-11	6.63734e-10	1.65338e-08	9.77861e-10	1.62764e-08	4.48422e-10	0.14852	0.31474
Sum EC20	8.1	0.84722	7.25875e-08	6.85833e-10	3.90137e-08	7.25875e-08	6.85833e-10	4.73872e-10	2.16323e-11	6.68882e-10	9.65859e-09	5.71239e-10	1.64026e-08	1.03183e-10	3.00367e-09	8.17475e-10	2.16323e-11	6.68881e-10	1.6662e-08	9.85443e-10	1.64026e-08	4.519e-10	0.14827	0.31426
Sum EC20	8.1	0.84722	7.42005e-08	7.04793e-10	4.00919e-08	7.42005e-08	7.04793e-10	4.86971e-10	2.22303e-11	6.87373e-10	9.92552e-09	5.87031e-10	1.6856e-08	1.06034e-10	3.0867e-09	8.40073e-10	2.22303e-11	6.87372e-10	1.71225e-08	1.01268e-09	1.68559e-08	4.64386e-10	0.14725	0.31243
Sum EC20	8.2	1.0319	6.97027e-08	5.16718e-10	3.84511e-08	6.97027e-08	5.16718e-10	4.49465e-10	2.58308e-11	5.68297e-10	8.43682e-09	5.11421e-10	1.80376e-08	1.65616e-10	2.381e-09	7.97526e-10	2.58308e-11	5.68296e-10	1.49702e-08	9.07459e-10	1.80376e-08	7.63148e-10	0.14388	0.30447
Sum EC20	8.2	1.0319	6.46205e-08	4.68451e-10	3.48592e-08	6.46205e-08	4.68451e-10	4.0748e-10	2.34179e-11	5.15212e-10	7.64871e-09	4.63649e-10	1.63526e-08	1.50145e-10	2.15859e-09	7.23028e-10	2.34179e-11	5.15211e-10	1.35718e-08	8.22692e-10	1.63526e-08	6.91859e-10	0.14814	0.31241
Sum EC20	8.2	1.0319	6.67958e-08	4.87741e-10	3.62955e-08	6.67958e-08	4.87741e-10	4.24259e-10	2.43822e-11	5.36428e-10	7.96388e-09	4.82741e-10	1.70265e-08	1.56336e-10	2.24748e-09	7.52801e-10	2.43822e-11	5.36427e-10	1.4131e-08	8.56569e-10	1.70264e-08	7.20386e-10	0.1468	0.30982
Sum EC70	8.1	1.03191	1.47635e-07	1.5449e-09	1.02888e-07	1.47635e-07	1.5449e-09	1.06743e-09	4.87285e-11	1.69892e-09	2.53302e-08	1.52895e-09	4.30169e-08	3.1505e-10	7.11879e-09	1.89405e-09	4.87285e-11	1.69892e-09	4.49458e-08	2.71296e-09	4.30169e-08	1.45173e-09	0.09393	0.20916
Sum EC70	8.1	1.03192	1.49924e-07	1.57498e-09	1.04888e-07	1.49924e-07	1.57498e-09	1.08822e-09	4.96775e-11	1.73201e-09	2.58225e-08	1.55873e-09	4.38529e-08	3.21159e-10	7.25743e-09	1.93093e-09	4.96774e-11	1.732e-09	4.58192e-08	2.76579e-09	4.38528e-08	1.47988e-09	0.09303	0.20736
Sum EC70	8.1	1.03192	1.45364e-07	1.51439e-09	1.00861e-07	1.45364e-07	1.51439e-09	1.04635e-09	4.77662e-11	1.66538e-09	2.48314e-08	1.49877e-09	4.21698e-08	3.08863e-10	6.9782e-09	1.85664e-09	4.77661e-11	1.66537e-09	4.40606e-08	2.6594e-09	4.21697e-08	1.42322e-09	0.09495	0.21119
Sum EC70	8.1	1.03192	1.43838e-07	1.49542e-09	9.9598e-08	1.43838e-07	1.49542e-09	1.03325e-09	4.71679e-11	1.64452e-09	2.45204e-08	1.47999e-09	4.16417e-08	3.04996e-10	6.89079e-09	1.83338e-09	4.71678e-11	1.64451e-09	4.35089e-08	2.62609e-09	4.16416e-08	1.40541e-09	0.09545	0.21212
Cu high	7.9	0.65052	9.34374e-08	1.12911e-09	4.32226e-08	9.34374e-08	1.12911e-09	4.92241e-10	1.41782e-11	9.36351e-10	1.29602e-08	7.46414e-10	1.38871e-08	4.49251e-11	4.60899e-09	8.17895e-10	1.41781e-11	9.3635e-10	2.15344e-08	1.24022e-09	1.38871e-08	1.83383e-10	0.17326	0.36415
Cu high	7.9	0.65423	8.70425e-08	1.01388e-09	3.8992e-08	8.70425e-08	1.01388e-09	4.42008e-10	1.27313e-11	8.437e-10	1.16913e-08	6.73613e-10	1.25274e-08	4.07133e-11	4.14501e-09	7.35018e-10	1.27313e-11	8.43699e-10	1.94415e-08	1.12016e-09	1.25274e-08	1.66446e-10	0.17961	0.37243
Cu low	7.9	0.66168	8.32736e-08	9.44535e-10	3.66568e-08	8.32736e-08	9.44535e-10	4.11775e-10	1.18605e-11	7.91406e-10	1.09899e-08	6.33772e-10	1.17759e-08	3.86161e-11	3.87335e-09	6.85841e-10	1.18605e-11	7.91405e-10	1.83044e-08	1.05559e-09	1.17758e-08	1.58357e-10	0.1833	0.37651
Cu low	7.9	0.66168	7.59925e-08	8.20192e-10	3.18312e-08	7.59925e-08	8.20192e-10	3.57567e-10	1.02991e-11	6.87222e-10	9.54315e-09	5.5034e-10	1.02257e-08	3.35326e-11	3.36345e-09	5.95554e-10	1.02991e-11	6.87221e-10	1.58948e-08	9.16631e-10	1.02256e-08	1.37511e-10	0.19253	0.3886
Cu high	8	0.65422	6.37827e-08	5.6293e-10	2.36278e-08	6.37827e-08	5.6293e-10	3.08956e-10	1.12031e-11	4.68455e-10	6.49574e-09	3.74005e-10	8.76251e-09	3.58759e-11	2.30139e-09	5.13764e-10	1.12031e-11	4.68454e-10	1.08018e-08	6.21935e-10	8.7625e-09	1.46669e-10	0.2118	0.41775
Cu high	7.9	0.65423	7.70569e-08	8.4138e-10	3.2358e-08	7.70569e-08	8.4138e-10	3.66804e-10	1.05652e-11	7.00152e-10	9.70213e-09	5.59004e-10	1.0396e-08	3.37865e-11	3.43977e-09	6.09961e-10	1.05651e-11	7.00151e-10	1.61337e-08	9.29572e-10	1.0396e-08	1.38127e-10	0.1917	0.38838
Cu low	7.9	0.65423	4.48302e-08	3.28014e-10	1.26149e-08	4.48302e-08	3.28014e-10	1.42999e-10	4.11885e-12	2.72956e-10	3.78243e-09	2.17929e-10	4.05295e-09	1.31719e-11	1.341e-09	2.37795e-10	4.11884e-12	2.72955e-10	6.28983e-09	3.62396e-10	4.05294e-09	5.38502e-11	0.25316	0.46545
Cu low	7.9	0.65423	4.01933e-08	2.63955e-10	1.01513e-08	4.01933e-08	2.63955e-10	1.15073e-10	3.31447e-12	2.19649e-10	3.04375e-09	1.75369e-10	3.26144e-09	1.05996e-11	1.07911e-09	1.91355e-10	3.31446e-12	2.19649e-10	5.06148e-09	2.91622e-10	3.26143e-09	4.33337e-11	0.26553	0.48191
Cu low	8	0.66168	4.09133e-08	2.46803e-10	1.04532e-08	4.09133e-08	2.46803e-10	1.35454e-10	4.91172e-12	2.06797e-10	2.87352e-09	1.65602e-10	3.87628e-09	1.60133e-11	1.01209e-09	2.25608e-10	4.91172e-12	2.06797e-10	4.78606e-09	2.75822e-10	3.87627e-09	6.56672e-11	0.26223	0.48228
Cu low	8	0.66168	3.61919e-08	1.91426e-10	8.10781e-09	3.61919e-08	1.91426e-10	1.05062e-10	3.80966e-12	1.60397e-10	2.22878e-09	1.28445e-10	3.00654e-09	1.24203e-11	7.85001e-10	1.74988e-10	3.80965e-12	1.60397e-10	3.71219e-09	2.13934e-10	3.00654e-09	5.09332e-11	0.27489	0.50108
Cu high	7.9	0.65423	1.70263e-07	2.57278e-09	9.89424e-08	1.70263e-07	2.57278e-09	1.12162e-09	3.23063e-11	2.14094e-09	2.96665e-08	1.70933e-09	3.17883e-08	1.03307e-10	1.05182e-08	1.86515e-09	3.23063e-11	2.14093e-09	4.93327e-08	2.84246e-09	3.17882e-08	4.22345e-10	0.1277	0.29118
Cu high	7.9	0.65423	1.73046e-07	2.62768e-09	1.01054e-07	1.73046e-07	2.62768e-09	1.14555e-09	3.29957e-11	2.18662e-09	3.02995e-08	1.7458e-09	3.24665e-08	1.05511e-10	1.07426e-08	1.90495e-09	3.29956e-11	2.18661e-09	5.03853e-08	2.90311e-09	3.24664e-08	4.31356e-10	0.12672	0.28932
Cu high	7.9	0.66168	1.61678e-07	2.39185e-09	9.28243e-08	1.61678e-07	2.39185e-09	1.04274e-09	3.00343e-11	2.00408e-09	2.78291e-08	1.6049e-09	2.98194e-08	9.77832e-11	9.80851e-09	1.73676e-09	3.00343e-11	2.00408e-09	4.63514e-08	2.67309e-09	2.98194e-08	4.0099e-10	0.13031	0.29556
Cu high	7.9	0.66168	1.57601e-07	2.31292e-09	8.97611e-08	1.57601e-07	2.31292e-09	1.00833e-09	2.90432e-11	1.93794e-09	2.69107e-08	1.55194e-09	2.88354e-08	9.45564e-11	9.48481e-09	1.67944e-09	2.90431e-11	1.93794e-09	4.48218e-08	2.58487e-09	2.88353e-08	3.87757e-10	0.13194	0.29851
Cu high	7.9	0.65423	1.50296e-07	2.1834e-09	8.39682e-08	1.50296e-07	2.1834e-09	9.51866e-10	2.74169e-11	1.81691e-09	2.51767e-08	1.45063e-09	2.69774e-08	8.76729e-11	8.92629e-09	1.58286e-09	2.74168e-11	1.81691e-09	4.18666e-08	2.41226e-09	2.69773e-08	3.58429e-10	0.13567	0.30565
Cu high	7.9	0.65423	1.64831e-07	2.46607e-09	9.48388e-08	1.64831e-07	2.46607e-09	1.0751e-09	3.09664e-11	2.05214e-09	2.84361e-08	1.63843e-09	3.04698e-08	9.90226e-11	1.00819e-08	1.78779e-09	3.09663e-11	2.05213e-09	4.72866e-08	2.72456e-09	3.04698e-08	4.04829e-10	0.12971	0.29492
Cu high	7.9	0.65423	8.06147e-08	9.02328e-10	3.47019e-08	8.06147e-08	9.02328e-10	3.93375e-10	1.13305e-11	7.5087e-10	1.04049e-08	5.99498e-10	1.11491e-08	3.62339e-11	3.68894e-09	6.54146e-10	1.13305e-11	7.50869e-10	1.73024e-08	9.96909e-10	1.11491e-08	1.48133e-10	0.18712	0.38241
Cu high	7.9	0.65423	8.39204e-08	9.59477e-10	3.68997e-08	8.39204e-08	9.59477e-10	4.18289e-10	1.20481e-11	7.98426e-10	1.10639e-08	6.37467e-10	1.18552e-08	3.85286e-11	3.92258e-09	6.95576e-10	1.20481e-11	7.98425e-10	1.83983e-08	1.06005e-09	1.18552e-08	1.57515e-10	0.18314	0.37716
Cu high	8	0.66168	7.55357e-08	7.38633e-10	3.12843e-08	7.55357e-08	7.38633e-10	4.05388e-10	1.46998e-11	6.18904e-10	8.59983e-09	4.95615e-10	1.16009e-08	4.79238e-11	3.02898e-09	6.75202e-10	1.46998e-11	6.18903e-10	1.43236e-08	8.25482e-10	1.16008e-08	1.96526e-10	0.19298	0.39285
Cu high	8	0.66168	7.55357e-08	7.38632e-10	3.12843e-08	7.55357e-08	7.38632e-10	4.05387e-10	1.46998e-11	6.18903e-10	8.59982e-09	4.95614e-10	1.16008e-08	4.79238e-11	3.02898e-09	6.75202e-10	1.46998e-11	6.18902e-10	1.43236e-08	8.25481e-10	1.16008e-08	1.96526e-10	0.19298	0.39285
Control	7.7	0.27931	0	0	0	0	-	-	-	-	-	-	-	-	-	-	-	-	-	-	-	-	0	0
Control	7.7	0.28315	0	0	0	0	-	-	-	-	-	-	-	-	-	-	-	-	-	-	-	-	0	0
Control	7.7	0.28499	0	0	0	0	-	-	-	-	-	-	-	-	-	-	-	-	-	-	-	-	0	0
Control	7.9	0.34166	0	0	0	0	-	-	-	-	-	-	-	-	-	-	-	-	-	-	-	-	0	0
Control	7.9	0.34166	0	0	0	0	-	-	-	-	-	-	-	-	-	-	-	-	-	-	-	-	0	0
Control	7.9	0.46939	0	0	0	0	-	-	-	-	-	-	-	-	-	-	-	-	-	-	-	-	0	0
Control	7.9	0.47692	0	0	0	0	-	-	-	-	-	-	-	-	-	-	-	-	-	-	-	-	0	0
Control	7.9	0.4731	0	0	0	0	-	-	-	-	-	-	-	-	-	-	-	-	-	-	-	-	0	0
Control	7.9	0.47499	0	0	0	0	-	-	-	-	-	-	-	-	-	-	-	-	-	-	-	-	0	0
Control	7.9	0.47499	0	0	0	0	-	-	-	-	-	-	-	-	-	-	-	-	-	-	-	-	0	0
Control	7.9	0.66168	0	0	0	0	-	-	-	-	-	-	-	-	-	-	-	-	-	-	-	-	0	0
Control	7.9	0.66168	0	0	0	0	-	-	-	-	-	-	-	-	-	-	-	-	-	-	-	-	0	0
Control	8.1	0.8472	0	0	0	0	-	-	-	-	-	-	-	-	-	-	-	-	-	-	-	-	0	0
Control	8.1	0.85095	0	0	0	0	-	-	-	-	-	-	-	-	-	-	-	-	-	-	-	-	0	0
Control	8.1	0.85274	0	0	0	0	-	-	-	-	-	-	-	-	-	-	-	-	-	-	-	-	0	0
Control	8.2	1.0356	0	0	0	0	-	-	-	-	-	-	-	-	-	-	-	-	-	-	-	-	0	0
Control	8.2	1.03926	0	0	0	0	-	-	-	-	-	-	-	-	-	-	-	-	-	-	-	-	0	0
Control	8.2	1.03739	0	0	0	0	-	-	-	-	-	-	-	-	-	-	-	-	-	-	-	-	0	0
Control	8.1	0.65422	0	0	0	0	-	-	-	-	-	-	-	-	-	-	-	-	-	-	-	-	0	0
Control	8.1	0.65422	0	0	0	0	-	-	-	-	-	-	-	-	-	-	-	-	-	-	-	-	0	0
Control	8.1	0.65422	0	0	0	0	-	-	-	-	-	-	-	-	-	-	-	-	-	-	-	-	0	0
Control	8.1	0.65422	0	0	0	0	-	-	-	-	-	-	-	-	-	-	-	-	-	-	-	-	0	0
Control	7.9	0.65793	0	0	0	0	-	-	-	-	-	-	-	-	-	-	-	-	-	-	-	-	0	0
Control	8	0.65792	0	0	0	0	-	-	-	-	-	-	-	-	-	-	-	-	-	-	-	-	0	0
Control	8	0.65422	0	0	0	0	-	-	-	-	-	-	-	-	-	-	-	-	-	-	-	-	0	0
Control	8	0.65422	0	0	0	0	-	-	-	-	-	-	-	-	-	-	-	-	-	-	-	-	0	0
Control	8	0.64864	0	0	0	0	-	-	-	-	-	-	-	-	-	-	-	-	-	-	-	-	0	0
Control	7.9	0.65612	0	0	0	0	-	-	-	-	-	-	-	-	-	-	-	-	-	-	-	-	0	0
Control	8	0.66168	0	0	0	0	-	-	-	-	-	-	-	-	-	-	-	-	-	-	-	-	0	0
Control	8	0.66168	0	0	0	0	-	-	-	-	-	-	-	-	-	-	-	-	-	-	-	-	0	0

## Sheet: Zinc
Treatment	pH	Ionic strength (M)	Total (M): Zn	Free ion activity (M): Zn	Total true solution concentration (M): Zn	Total aqueous concentration (M): Zn	Activity (M): Zn[2+]	Activity (M): ZnOH[+]	Activity (M): Zn(OH)2[0]	Activity (M): ZnSO4[0]	Activity (M): ZnCO3[0]	Activity (M): ZnCl[+]	Activity (M): ZnHCO3[+]	Aqueous concentration (M): Zn[2+]	Aqueous concentration (M): ZnOH[+]	Aqueous concentration (M): Zn(OH)2[0]	Aqueous concentration (M): ZnSO4[0]	Aqueous concentration (M): ZnCO3[0]	Aqueous concentration (M): ZnCl[+]	Aqueous concentration (M): ZnHCO3[+]	Fraction bound to colloidal HA : Zn	Fraction bound to colloidal FA : Zn
Cu high	7.7	0.28499	0	0	0	0	-	-	-	-	-	-	-	-	-	-	-	-	-	-	0	0
Cu high	7.7	0.28499	0	0	0	0	-	-	-	-	-	-	-	-	-	-	-	-	-	-	0	0
Cu high	7.7	0.47499	0	0	0	0	-	-	-	-	-	-	-	-	-	-	-	-	-	-	0	0
Cu high	7.8	0.47499	0	0	0	0	-	-	-	-	-	-	-	-	-	-	-	-	-	-	0	0
Cu high	7.9	0.66168	0	0	0	0	-	-	-	-	-	-	-	-	-	-	-	-	-	-	0	0
Cu high	7.9	0.66168	0	0	0	0	-	-	-	-	-	-	-	-	-	-	-	-	-	-	0	0
Cu high	8.1	1.0319	0	0	0	0	-	-	-	-	-	-	-	-	-	-	-	-	-	-	0	0
Cu high	8.1	1.0319	0	0	0	0	-	-	-	-	-	-	-	-	-	-	-	-	-	-	0	0
Cu high	8.1	1.0319	0	0	0	0	-	-	-	-	-	-	-	-	-	-	-	-	-	-	0	0
Cu high	8.1	1.0319	0	0	0	0	-	-	-	-	-	-	-	-	-	-	-	-	-	-	0	0
Cd low	7.7	0.28692	0	0	0	0	-	-	-	-	-	-	-	-	-	-	-	-	-	-	0	0
Cd low	7.7	0.28692	0	0	0	0	-	-	-	-	-	-	-	-	-	-	-	-	-	-	0	0
Cd low	7.7	0.28692	0	0	0	0	-	-	-	-	-	-	-	-	-	-	-	-	-	-	0	0
Cd low	7.9	0.47499	0	0	0	0	-	-	-	-	-	-	-	-	-	-	-	-	-	-	0	0
Cd low	8	0.47499	0	0	0	0	-	-	-	-	-	-	-	-	-	-	-	-	-	-	0	0
Cd low	8	0.47499	0	0	0	0	-	-	-	-	-	-	-	-	-	-	-	-	-	-	0	0
Cd high	7.7	0.28499	0	0	0	0	-	-	-	-	-	-	-	-	-	-	-	-	-	-	0	0
Cd high	7.7	0.28499	0	0	0	0	-	-	-	-	-	-	-	-	-	-	-	-	-	-	0	0
Cd high	7.8	0.47499	0	0	0	0	-	-	-	-	-	-	-	-	-	-	-	-	-	-	0	0
Cd high	7.8	0.47499	0	0	0	0	-	-	-	-	-	-	-	-	-	-	-	-	-	-	0	0
Cd high	7.9	0.66168	0	0	0	0	-	-	-	-	-	-	-	-	-	-	-	-	-	-	0	0
Cd high	7.9	0.66168	0	0	0	0	-	-	-	-	-	-	-	-	-	-	-	-	-	-	0	0
Cd low	8.1	0.8472	0	0	0	0	-	-	-	-	-	-	-	-	-	-	-	-	-	-	0	0
Cd low	8.1	0.8472	0	0	0	0	-	-	-	-	-	-	-	-	-	-	-	-	-	-	0	0
Cd low	8.1	0.8472	0	0	0	0	-	-	-	-	-	-	-	-	-	-	-	-	-	-	0	0
Cd low	8.2	1.03188	0	0	0	0	-	-	-	-	-	-	-	-	-	-	-	-	-	-	0	0
Cd low	8.2	1.03188	0	0	0	0	-	-	-	-	-	-	-	-	-	-	-	-	-	-	0	0
Cd low	8.2	1.03188	0	0	0	0	-	-	-	-	-	-	-	-	-	-	-	-	-	-	0	0
Cd high	8.1	1.03189	0	0	0	0	-	-	-	-	-	-	-	-	-	-	-	-	-	-	0	0
Cd high	8.1	1.03189	0	0	0	0	-	-	-	-	-	-	-	-	-	-	-	-	-	-	0	0
Cd high	8.1	1.03189	0	0	0	0	-	-	-	-	-	-	-	-	-	-	-	-	-	-	0	0
Cd high	8.2	1.03187	0	0	0	0	-	-	-	-	-	-	-	-	-	-	-	-	-	-	0	0
Pb high	7.7	0.28499	0	0	0	0	-	-	-	-	-	-	-	-	-	-	-	-	-	-	0	0
Pb high	7.7	0.28499	0	0	0	0	-	-	-	-	-	-	-	-	-	-	-	-	-	-	0	0
Pb high	7.8	0.47499	0	0	0	0	-	-	-	-	-	-	-	-	-	-	-	-	-	-	0	0
Pb high	7.8	0.47499	0	0	0	0	-	-	-	-	-	-	-	-	-	-	-	-	-	-	0	0
Pb low	7.9	0.66168	0	0	0	0	-	-	-	-	-	-	-	-	-	-	-	-	-	-	0	0
Pb low	7.9	0.66168	0	0	0	0	-	-	-	-	-	-	-	-	-	-	-	-	-	-	0	0
Pb low	8.2	1.03188	0	0	0	0	-	-	-	-	-	-	-	-	-	-	-	-	-	-	0	0
Pb low	8.2	1.03188	0	0	0	0	-	-	-	-	-	-	-	-	-	-	-	-	-	-	0	0
Pb low	8.2	1.03188	0	0	0	0	-	-	-	-	-	-	-	-	-	-	-	-	-	-	0	0
Pb low	8.1	1.0319	0	0	0	0	-	-	-	-	-	-	-	-	-	-	-	-	-	-	0	0
Zn low	7.7	0.28693	5.93963e-06	1.25835e-06	5.83238e-06	5.93963e-06	1.25835e-06	1.25673e-08	1.31427e-09	7.0806e-07	5.05402e-08	4.21334e-07	2.31013e-07	4.08415e-06	1.86794e-08	1.31427e-09	7.08058e-07	5.054e-08	6.26249e-07	3.43366e-07	0.00603824	0.01202
Zn low	7.7	0.28693	6.46888e-06	1.3711e-06	6.35497e-06	6.46888e-06	1.3711e-06	1.36934e-08	1.43203e-09	7.71501e-07	5.50666e-08	4.59087e-07	2.51703e-07	4.45012e-06	2.03532e-08	1.43203e-09	7.71499e-07	5.50664e-08	6.82363e-07	3.74118e-07	0.00587972	0.01173
Zn low	7.7	0.28693	6.56584e-06	1.39176e-06	6.45072e-06	6.56584e-06	1.39176e-06	1.38997e-08	1.45361e-09	7.83125e-07	5.58959e-08	4.66005e-07	2.55493e-07	4.51717e-06	2.06599e-08	1.45361e-09	7.83123e-07	5.58957e-08	6.92645e-07	3.79752e-07	0.00585254	0.01168
Zn low	7.9	0.475	5.95413e-06	9.93188e-07	5.87765e-06	5.95413e-06	9.93188e-07	1.57208e-08	2.60565e-09	7.66402e-07	9.69777e-08	5.18084e-07	2.79687e-07	3.71805e-06	2.4999e-08	2.60564e-09	7.66401e-07	9.69775e-08	8.2385e-07	4.44754e-07	0.00426938	0.00857825
Zn low	7.9	0.475	5.99818e-06	1.00056e-06	5.92129e-06	5.99818e-06	1.00056e-06	1.58375e-08	2.625e-09	7.72093e-07	9.76976e-08	5.21931e-07	2.81763e-07	3.74566e-06	2.51846e-08	2.62499e-09	7.72092e-07	9.76974e-08	8.29968e-07	4.48056e-07	0.00425947	0.00856064
Zn low	7.9	0.475	6.13851e-06	1.02406e-06	6.06035e-06	6.13851e-06	1.02406e-06	1.62095e-08	2.68665e-09	7.90226e-07	9.99912e-08	5.34189e-07	2.88378e-07	3.83363e-06	2.57761e-08	2.68664e-09	7.90224e-07	9.9991e-08	8.4946e-07	4.58574e-07	0.00422852	0.0085056
Zn high	7.7	0.28501	1.34044e-05	2.85927e-06	1.3214e-05	1.34044e-05	2.85927e-06	2.8556e-08	2.98634e-09	1.60369e-06	1.14147e-07	9.51849e-07	5.21753e-07	9.26236e-06	4.24071e-08	2.98633e-09	1.60369e-06	1.14147e-07	1.41355e-06	7.74831e-07	0.00470764	0.00950159
Zn high	7.7	0.28694	1.3386e-05	2.84737e-06	1.31969e-05	1.3386e-05	2.84737e-06	2.84371e-08	2.97391e-09	1.60205e-06	1.14295e-07	9.5338e-07	5.22431e-07	9.24164e-06	4.22676e-08	2.9739e-09	1.60205e-06	1.14295e-07	1.41706e-06	7.76517e-07	0.00468255	0.00945014
Zn high	7.8	0.47501	1.35939e-05	2.28531e-06	1.34597e-05	1.35939e-05	2.28531e-06	2.87334e-08	3.78293e-09	1.76334e-06	1.76568e-07	1.19209e-06	6.41078e-07	8.5552e-06	4.56915e-08	3.78293e-09	1.76334e-06	1.76567e-07	1.89566e-06	1.01944e-06	0.00325326	0.00662023
Zn high	7.8	0.47501	1.36283e-05	2.29111e-06	1.34939e-05	1.36283e-05	2.29111e-06	2.88063e-08	3.79254e-09	1.76782e-06	1.77015e-07	1.19512e-06	6.42704e-07	8.57691e-06	4.58075e-08	3.79253e-09	1.76781e-06	1.77015e-07	1.90047e-06	1.02202e-06	0.00325071	0.00661534
Zn high	7.9	0.6617	1.22573e-05	1.74241e-06	1.2159e-05	1.22573e-05	1.74241e-06	2.75799e-08	4.57125e-09	1.65048e-06	2.22154e-07	1.21483e-06	6.40699e-07	7.14533e-06	4.59365e-08	4.57124e-09	1.65048e-06	2.22154e-07	2.0234e-06	1.06713e-06	0.00263589	0.00538225
Zn high	7.9	0.6617	1.21101e-05	1.72144e-06	1.20127e-05	1.21101e-05	1.72144e-06	2.72479e-08	4.51622e-09	1.63061e-06	2.19481e-07	1.20021e-06	6.32991e-07	7.05931e-06	4.53835e-08	4.51621e-09	1.63061e-06	2.19481e-07	1.99904e-06	1.0543e-06	0.00264585	0.00540064
Zn low	8.1	0.84721	5.9085e-06	7.28636e-07	5.85864e-06	5.9085e-06	7.28636e-07	1.8279e-08	4.8017e-09	8.03471e-07	1.78741e-07	6.30618e-07	3.25256e-07	3.19112e-06	3.1533e-08	4.80169e-09	8.03469e-07	1.78741e-07	1.08787e-06	5.61097e-07	0.00278567	0.00565388
Zn low	8.1	0.84721	6.25139e-06	7.71029e-07	6.19949e-06	6.25139e-06	7.71029e-07	1.93425e-08	5.08107e-09	8.50216e-07	1.89138e-07	6.67307e-07	3.44174e-07	3.37678e-06	3.33676e-08	5.08106e-09	8.50215e-07	1.89137e-07	1.15117e-06	5.93732e-07	0.00273743	0.00556631
Zn low	8.1	0.84721	6.24458e-06	7.70187e-07	6.19272e-06	6.24458e-06	7.70187e-07	1.93214e-08	5.07552e-09	8.49288e-07	1.88931e-07	6.66579e-07	3.43798e-07	3.37309e-06	3.33312e-08	5.07551e-09	8.49287e-07	1.88931e-07	1.14991e-06	5.93085e-07	0.00273835	0.00556799
Zn low	8.2	1.03189	6.30745e-06	6.94361e-07	6.2623e-06	6.30745e-06	6.94361e-07	2.19294e-08	7.2522e-09	8.63435e-07	2.4855e-07	7.14111e-07	3.59264e-07	3.19956e-06	3.89113e-08	7.25219e-09	8.63434e-07	2.4855e-07	1.26711e-06	6.37473e-07	0.00234215	0.00481782
Zn low	8.2	1.03189	6.15937e-06	6.78027e-07	6.11498e-06	6.15937e-06	6.78027e-07	2.14136e-08	7.0816e-09	8.43124e-07	2.42704e-07	6.97312e-07	3.50815e-07	3.12429e-06	3.79959e-08	7.08159e-09	8.43123e-07	2.42704e-07	1.2373e-06	6.2248e-07	0.00235904	0.00484934
Zn low	8.2	1.03189	6.23597e-06	6.86476e-07	6.19118e-06	6.23597e-06	6.86476e-07	2.16804e-08	7.16984e-09	8.5363e-07	2.45728e-07	7.06001e-07	3.55185e-07	3.16322e-06	3.84694e-08	7.16983e-09	8.53629e-07	2.45728e-07	1.25272e-06	6.30235e-07	0.00235024	0.00483292
Zn high	8.1	1.03192	1.27617e-05	1.42009e-06	1.26885e-05	1.27617e-05	1.42009e-06	3.56254e-08	9.35839e-09	1.76574e-06	4.05539e-07	1.46048e-06	7.3796e-07	6.54371e-06	6.32133e-08	9.35838e-09	1.76574e-06	4.05539e-07	2.59146e-06	1.30943e-06	0.0018664	0.00387503
Zn high	8.1	1.03192	1.23429e-05	1.3734e-06	1.22713e-05	1.23429e-05	1.3734e-06	3.44541e-08	9.05071e-09	1.70769e-06	3.92213e-07	1.41246e-06	7.1371e-07	6.32857e-06	6.1135e-08	9.0507e-09	1.70769e-06	3.92212e-07	2.50626e-06	1.2664e-06	0.00188603	0.00391124
Zn high	8.1	1.03192	1.3222e-05	1.4714e-06	1.31468e-05	1.3222e-05	1.4714e-06	3.69125e-08	9.6965e-09	1.82953e-06	4.20182e-07	1.51324e-06	7.64606e-07	6.78013e-06	6.54972e-08	9.69649e-09	1.82953e-06	4.20182e-07	2.68508e-06	1.35671e-06	0.00184578	0.00383694
Zn high	8.1	1.03192	1.30776e-05	1.45531e-06	1.30031e-05	1.30776e-05	1.45531e-06	3.65088e-08	9.59047e-09	1.80953e-06	4.1559e-07	1.4967e-06	7.5625e-07	6.70599e-06	6.4781e-08	9.59046e-09	1.80952e-06	4.1559e-07	2.65572e-06	1.34188e-06	0.00185214	0.0038487
Ni high	7.8	0.28501	0	0	0	0	-	-	-	-	-	-	-	-	-	-	-	-	-	-	0	0
Ni high	7.7	0.28501	0	0	0	0	-	-	-	-	-	-	-	-	-	-	-	-	-	-	0	0
Ni high	7.8	0.47501	0	0	0	0	-	-	-	-	-	-	-	-	-	-	-	-	-	-	0	0
Ni high	7.8	0.47501	0	0	0	0	-	-	-	-	-	-	-	-	-	-	-	-	-	-	0	0
Ni high	7.9	0.6617	0	0	0	0	-	-	-	-	-	-	-	-	-	-	-	-	-	-	0	0
Ni high	7.9	0.6617	0	0	0	0	-	-	-	-	-	-	-	-	-	-	-	-	-	-	0	0
Ni high	8.1	0.84722	0	0	0	0	-	-	-	-	-	-	-	-	-	-	-	-	-	-	0	0
Ni high	8.1	0.84722	0	0	0	0	-	-	-	-	-	-	-	-	-	-	-	-	-	-	0	0
Ni high	8.1	0.84722	0	0	0	0	-	-	-	-	-	-	-	-	-	-	-	-	-	-	0	0
Ni high	8.2	1.0319	0	0	0	0	-	-	-	-	-	-	-	-	-	-	-	-	-	-	0	0
Ni high	8.2	1.0319	0	0	0	0	-	-	-	-	-	-	-	-	-	-	-	-	-	-	0	0
Ni high	8.2	1.0319	0	0	0	0	-	-	-	-	-	-	-	-	-	-	-	-	-	-	0	0
Ni high	8.2	1.0319	0	0	0	0	-	-	-	-	-	-	-	-	-	-	-	-	-	-	0	0
Sum EC10	7.7	0.28694	6.07594e-06	1.29542e-06	6.00327e-06	6.07594e-06	1.29542e-06	1.29376e-08	1.35299e-09	7.28867e-07	5.19118e-08	4.33743e-07	2.37283e-07	4.20452e-06	1.92298e-08	1.35299e-09	7.28864e-07	5.19116e-08	6.44695e-07	3.52686e-07	0.00400515	0.00795683
Sum EC10	7.7	0.28694	6.57367e-06	1.402e-06	6.49712e-06	6.57367e-06	1.402e-06	1.4002e-08	1.46431e-09	7.88827e-07	5.61736e-08	4.69428e-07	2.56763e-07	4.55045e-06	2.08119e-08	1.4643e-09	7.88824e-07	5.61734e-08	6.97737e-07	3.81641e-07	0.00390219	0.00774643
Sum EC10	7.7	0.28694	6.59394e-06	1.4063e-06	6.51704e-06	6.59394e-06	1.4063e-06	1.40449e-08	1.46879e-09	7.91245e-07	5.63465e-08	4.70867e-07	2.57553e-07	4.56439e-06	2.08757e-08	1.46879e-09	7.91242e-07	5.63463e-08	6.99875e-07	3.82815e-07	0.00390746	0.00775838
Sum EC10	7.9	0.47501	6.73499e-06	1.12843e-06	6.67673e-06	6.73499e-06	1.12843e-06	1.78614e-08	2.96045e-09	8.70716e-07	1.09963e-07	5.88625e-07	3.17137e-07	4.22434e-06	2.8403e-08	2.96044e-09	8.70714e-07	1.09963e-07	9.36026e-07	5.04308e-07	0.00282806	0.00582428
Sum EC10	7.9	0.47501	6.61685e-06	1.10865e-06	6.55973e-06	6.61685e-06	1.10865e-06	1.75483e-08	2.90856e-09	8.55456e-07	1.08041e-07	5.78308e-07	3.11595e-07	4.15029e-06	2.79052e-08	2.90855e-09	8.55454e-07	1.08041e-07	9.19619e-07	4.95495e-07	0.00281916	0.00581556
Sum EC10	7.9	0.47501	6.50734e-06	1.09024e-06	6.45082e-06	6.50734e-06	1.09024e-06	1.72569e-08	2.86026e-09	8.41252e-07	1.0625e-07	5.68705e-07	3.06427e-07	4.08138e-06	2.74418e-08	2.86026e-09	8.4125e-07	1.06249e-07	9.04349e-07	4.87277e-07	0.00283588	0.00585238
Sum EC50	7.7	0.28501	1.3264e-05	2.84206e-06	1.3132e-05	1.3264e-05	2.84206e-06	2.83841e-08	2.96837e-09	1.59387e-06	1.13177e-07	9.46009e-07	5.17317e-07	9.20669e-06	4.21521e-08	2.96836e-09	1.59386e-06	1.13176e-07	1.40488e-06	7.68246e-07	0.00332223	0.00663131
Sum EC50	7.7	0.28501	1.36678e-05	2.92885e-06	1.3533e-05	1.36678e-05	2.92885e-06	2.92509e-08	3.05901e-09	1.64253e-06	1.16626e-07	9.74894e-07	5.33082e-07	9.48784e-06	4.34393e-08	3.059e-09	1.64252e-06	1.16625e-07	1.44777e-06	7.91658e-07	0.00329325	0.0065748
Sum EC50	7.8	0.47501	1.31936e-05	2.22455e-06	1.30996e-05	1.31936e-05	2.22455e-06	2.79695e-08	3.68236e-09	1.71636e-06	1.71567e-07	1.16031e-06	6.22923e-07	8.32775e-06	4.44768e-08	3.68235e-09	1.71636e-06	1.71567e-07	1.84512e-06	9.90566e-07	0.00234503	0.00478843
Sum EC50	7.8	0.47501	1.32487e-05	2.23384e-06	1.31543e-05	1.32487e-05	2.23384e-06	2.80863e-08	3.69775e-09	1.72354e-06	1.72285e-07	1.16516e-06	6.25528e-07	8.36255e-06	4.46626e-08	3.69774e-09	1.72353e-06	1.72284e-07	1.85283e-06	9.9471e-07	0.00234289	0.00478514
Sum EC50	7.9	0.6617	1.20117e-05	1.71165e-06	1.19423e-05	1.20117e-05	1.71165e-06	2.7093e-08	4.49054e-09	1.62128e-06	2.17916e-07	1.19332e-06	6.28477e-07	7.01917e-06	4.51254e-08	4.49053e-09	1.62128e-06	2.17916e-07	1.98756e-06	1.04678e-06	0.00186888	0.0039058
Sum EC50	7.9	0.6617	1.25021e-05	1.78179e-06	1.24316e-05	1.25021e-05	1.78179e-06	2.82032e-08	4.67456e-09	1.68771e-06	2.26833e-07	1.24222e-06	6.54193e-07	7.3068e-06	4.69746e-08	4.67455e-09	1.68771e-06	2.26832e-07	2.06901e-06	1.08961e-06	0.00182485	0.00381409
Sum EC10	8.1	0.84722	6.47359e-06	8.00814e-07	6.43775e-06	6.47359e-06	8.00814e-07	2.00897e-08	5.27735e-09	8.83038e-07	1.96152e-07	6.93083e-07	3.56939e-07	3.50723e-06	3.46567e-08	5.27734e-09	8.83036e-07	1.96152e-07	1.19564e-06	6.15753e-07	0.00176977	0.00376717
Sum EC10	8.1	0.84722	6.45909e-06	7.99053e-07	6.42357e-06	6.45909e-06	7.99053e-07	2.00455e-08	5.26574e-09	8.81095e-07	1.95716e-07	6.91559e-07	3.56145e-07	3.49952e-06	3.45805e-08	5.26574e-09	8.81094e-07	1.95716e-07	1.19301e-06	6.14384e-07	0.0017564	0.00374373
Sum EC10	8.1	0.84722	6.39885e-06	7.91617e-07	6.3638e-06	6.39885e-06	7.91617e-07	1.9859e-08	5.21674e-09	8.72896e-07	1.93895e-07	6.85123e-07	3.52831e-07	3.46695e-06	3.42587e-08	5.21673e-09	8.72895e-07	1.93895e-07	1.1819e-06	6.08667e-07	0.00174828	0.00373075
Sum EC10	8.2	1.0319	6.63343e-06	7.32098e-07	6.60136e-06	6.63343e-06	7.32098e-07	2.31212e-08	7.64633e-09	9.10342e-07	2.61705e-07	7.52918e-07	3.78279e-07	3.37345e-06	4.1026e-08	7.64632e-09	9.1034e-07	2.61704e-07	1.33597e-06	6.71213e-07	0.00154336	0.00329384
Sum EC10	8.2	1.0319	6.36161e-06	7.02063e-07	6.33058e-06	6.36161e-06	7.02063e-07	2.21727e-08	7.33264e-09	8.72996e-07	2.50982e-07	7.22029e-07	3.62779e-07	3.23505e-06	3.93429e-08	7.33263e-09	8.72995e-07	2.50981e-07	1.28116e-06	6.4371e-07	0.00155824	0.0033203
Sum EC10	8.2	1.0319	6.47132e-06	7.14236e-07	6.44032e-06	6.47132e-06	7.14236e-07	2.25571e-08	7.45978e-09	8.88132e-07	2.55326e-07	7.34548e-07	3.69059e-07	3.29114e-06	4.00251e-08	7.45977e-09	8.8813e-07	2.55326e-07	1.30337e-06	6.54853e-07	0.00152579	0.00326685
Sum EC50	8.1	1.03191	1.1355e-05	1.26591e-06	1.1309e-05	1.1355e-05	1.26591e-06	3.17575e-08	8.34235e-09	1.574e-06	3.61093e-07	1.30186e-06	6.57081e-07	5.83325e-06	5.63502e-08	8.34234e-09	1.574e-06	3.61092e-07	2.31e-06	1.16592e-06	0.00128056	0.00277805
Sum EC50	8.1	1.03191	1.18549e-05	1.32172e-06	1.18074e-05	1.18549e-05	1.32172e-06	3.31574e-08	8.71008e-09	1.64338e-06	3.76995e-07	1.35924e-06	6.86018e-07	6.09038e-06	5.88341e-08	8.71007e-09	1.64338e-06	3.76994e-07	2.41183e-06	1.21726e-06	0.00126391	0.00274398
Sum EC50	8.1	1.03191	1.1782e-05	1.3136e-06	1.17348e-05	1.1782e-05	1.3136e-06	3.29537e-08	8.65657e-09	1.63329e-06	3.74668e-07	1.35089e-06	6.81784e-07	6.05296e-06	5.84727e-08	8.65656e-09	1.63328e-06	3.74668e-07	2.397e-06	1.20975e-06	0.00126436	0.00274499
Sum EC50	8.1	1.03191	1.18092e-05	1.31658e-06	1.17615e-05	1.18092e-05	1.31658e-06	3.30286e-08	8.67625e-09	1.637e-06	3.75522e-07	1.35396e-06	6.83337e-07	6.06672e-06	5.86056e-08	8.67624e-09	1.637e-06	3.75521e-07	2.40245e-06	1.21251e-06	0.00127452	0.00276387
Sum EC10 -Cu	7.7	0.28694	6.28866e-06	1.33906e-06	6.2055e-06	6.28866e-06	1.33906e-06	1.33734e-08	1.39857e-09	7.53418e-07	5.36598e-08	4.48354e-07	2.45273e-07	4.34615e-06	1.98776e-08	1.39856e-09	7.53415e-07	5.36597e-08	6.66412e-07	3.64562e-07	0.00445923	0.00876818
Sum EC10 -Cu	7.7	0.28694	6.18892e-06	1.31792e-06	6.10753e-06	6.18892e-06	1.31792e-06	1.31623e-08	1.37649e-09	7.41525e-07	5.28106e-08	4.41277e-07	2.41391e-07	4.27755e-06	1.95638e-08	1.37649e-09	7.41523e-07	5.28104e-08	6.55893e-07	3.58792e-07	0.00443717	0.00871676
Sum EC10 -Cu	7.7	0.28694	6.08792e-06	1.29642e-06	6.00788e-06	6.08792e-06	1.29642e-06	1.29475e-08	1.35403e-09	7.29427e-07	5.19487e-08	4.34077e-07	2.37451e-07	4.20776e-06	1.92446e-08	1.35403e-09	7.29425e-07	5.19485e-08	6.45192e-07	3.52937e-07	0.0044376	0.00871362
Sum EC10 -Cu	7.9	0.47501	5.83181e-06	9.75503e-07	5.77197e-06	5.83181e-06	9.75503e-07	1.54408e-08	2.55925e-09	7.52723e-07	9.50719e-08	5.08856e-07	2.7419e-07	3.65186e-06	2.45539e-08	2.55925e-09	7.52722e-07	9.50717e-08	8.09177e-07	4.36015e-07	0.003401	0.00686309
Sum EC10 -Cu	7.9	0.47501	5.99784e-06	1.00332e-06	5.93653e-06	5.99784e-06	1.00332e-06	1.58811e-08	2.63222e-09	7.74184e-07	9.77808e-08	5.23364e-07	2.82003e-07	3.75598e-06	2.5254e-08	2.63222e-09	7.74182e-07	9.77806e-08	8.32248e-07	4.48438e-07	0.00338667	0.0068378
Sum EC10 -Cu	7.9	0.47501	6.01987e-06	1.00703e-06	5.95847e-06	6.01987e-06	1.00703e-06	1.59398e-08	2.64195e-09	7.77045e-07	9.81416e-08	5.25299e-07	2.83044e-07	3.76986e-06	2.53473e-08	2.64195e-09	7.77044e-07	9.81414e-08	8.35324e-07	4.50093e-07	0.00337967	0.0068225
Sum EC10 -Cu	8.1	0.84722	5.41962e-06	6.69302e-07	5.38061e-06	5.41962e-06	6.69302e-07	1.67905e-08	4.41069e-09	7.38027e-07	1.6396e-07	5.79264e-07	2.98357e-07	2.93126e-06	2.89653e-08	4.41068e-09	7.38026e-07	1.63959e-07	9.99285e-07	5.14695e-07	0.00236118	0.0048373
Sum EC10 -Cu	8.1	0.84722	5.93565e-06	7.33155e-07	5.89387e-06	5.93565e-06	7.33155e-07	1.83924e-08	4.83148e-09	8.08433e-07	1.79587e-07	6.34526e-07	3.26795e-07	3.21091e-06	3.17286e-08	4.83147e-09	8.08432e-07	1.79587e-07	1.09462e-06	5.63753e-07	0.00230624	0.00473476
Sum EC10 -Cu	8.1	0.84722	5.62341e-06	6.94511e-07	5.58325e-06	5.62341e-06	6.94511e-07	1.74229e-08	4.57681e-09	7.65823e-07	1.7013e-07	6.01081e-07	3.09586e-07	3.04167e-06	3.00562e-08	4.57681e-09	7.65822e-07	1.7013e-07	1.03692e-06	5.34065e-07	0.00234176	0.00480207
Sum EC10 -Cu	8.2	1.0319	5.96557e-06	6.57484e-07	5.92862e-06	5.96557e-06	6.57484e-07	2.07648e-08	6.86704e-09	8.17564e-07	2.3505e-07	6.76183e-07	3.3975e-07	3.02963e-06	3.68447e-08	6.86703e-09	8.17563e-07	2.35049e-07	1.19981e-06	6.02848e-07	0.00201743	0.00417721
Sum EC10 -Cu	8.2	1.0319	6.17444e-06	6.80534e-07	6.13646e-06	6.17444e-06	6.80534e-07	2.14928e-08	7.10779e-09	8.46226e-07	2.43286e-07	6.99889e-07	3.51655e-07	3.13585e-06	3.81365e-08	7.10778e-09	8.46225e-07	2.43286e-07	1.24187e-06	6.23973e-07	0.00200279	0.00415042
Sum EC10 -Cu	8.2	1.0319	6.06343e-06	6.68287e-07	6.02602e-06	6.06343e-06	6.68287e-07	2.1106e-08	6.97987e-09	8.30997e-07	2.38908e-07	6.87293e-07	3.45328e-07	3.07941e-06	3.74501e-08	6.97986e-09	8.30996e-07	2.38908e-07	1.21952e-06	6.12745e-07	0.00200907	0.00416174
Sum EC50 -Cu	8.2	1.03189	1.09747e-05	1.21048e-06	1.09145e-05	1.09747e-05	1.21048e-06	3.82295e-08	1.26427e-08	1.50517e-06	4.32644e-07	1.24485e-06	6.25361e-07	5.57778e-06	6.78339e-08	1.26427e-08	1.50516e-06	4.32643e-07	2.20884e-06	1.10963e-06	0.00176359	0.00371472
Sum EC50 -Cu	8.1	1.03191	1.14002e-05	1.26936e-06	1.13398e-05	1.14002e-05	1.26936e-06	3.1844e-08	8.36508e-09	1.57829e-06	3.62079e-07	1.3054e-06	6.58875e-07	5.84914e-06	5.65037e-08	8.36507e-09	1.57829e-06	3.62078e-07	2.31629e-06	1.1691e-06	0.00172117	0.00358037
Sum EC50 -Cu	8.1	1.03191	1.09687e-05	1.22126e-06	1.09101e-05	1.09687e-05	1.22126e-06	3.06372e-08	8.04805e-09	1.51848e-06	3.4836e-07	1.25593e-06	6.33911e-07	5.62747e-06	5.43623e-08	8.04804e-09	1.51848e-06	3.4836e-07	2.22852e-06	1.12481e-06	0.00173702	0.00360964
Sum EC50 -Cu	8.1	1.03191	1.08329e-05	1.2061e-06	1.07747e-05	1.08329e-05	1.2061e-06	3.0257e-08	7.94819e-09	1.49964e-06	3.44045e-07	1.24035e-06	6.26059e-07	5.55764e-06	5.36877e-08	7.94818e-09	1.49964e-06	3.44044e-07	2.20086e-06	1.11087e-06	0.00174517	0.00362568
Sum EC20	7.7	0.28695	9.41801e-06	2.0118e-06	9.32216e-06	9.41801e-06	2.0118e-06	2.00922e-08	2.10121e-09	1.13185e-06	8.04966e-08	6.73601e-07	3.6794e-07	6.52971e-06	2.98642e-08	2.1012e-09	1.13185e-06	8.04963e-08	1.00121e-06	5.46891e-07	0.00341741	0.00676343
Sum EC20	7.7	0.28695	9.29063e-06	1.98436e-06	9.19506e-06	9.29063e-06	1.98436e-06	1.98182e-08	2.07255e-09	1.11642e-06	7.94032e-08	6.64415e-07	3.62943e-07	6.44066e-06	2.94569e-08	2.07255e-09	1.11641e-06	7.9403e-08	9.87559e-07	5.39463e-07	0.00345217	0.00683729
Sum EC20	7.7	0.28695	9.36187e-06	1.99999e-06	9.26741e-06	9.36187e-06	1.99999e-06	1.99742e-08	2.08887e-09	1.12521e-06	8.00223e-08	6.69646e-07	3.65772e-07	6.49137e-06	2.96888e-08	2.08886e-09	1.1252e-06	8.0022e-08	9.95334e-07	5.43669e-07	0.003388	0.0067052
Sum EC20	7.9	0.47501	9.20151e-06	1.54334e-06	9.13076e-06	9.20151e-06	1.54334e-06	2.44289e-08	4.04898e-09	1.19082e-06	1.50232e-07	8.05054e-07	4.33274e-07	5.77761e-06	3.88467e-08	4.04897e-09	1.19082e-06	1.50232e-07	1.28019e-06	6.8899e-07	0.00251538	0.00517522
Sum EC20	7.9	0.47501	8.98019e-06	1.50608e-06	8.9104e-06	8.98019e-06	1.50608e-06	2.38391e-08	3.95123e-09	1.16208e-06	1.4662e-07	7.85617e-07	4.22855e-07	5.63812e-06	3.79088e-08	3.95122e-09	1.16208e-06	1.46619e-07	1.24928e-06	6.72422e-07	0.00254117	0.00523236
Sum EC20	7.9	0.47501	9.23203e-06	1.54852e-06	9.1614e-06	9.23203e-06	1.54852e-06	2.45108e-08	4.06256e-09	1.19482e-06	1.50738e-07	8.07754e-07	4.34732e-07	5.79699e-06	3.8977e-08	4.06255e-09	1.19482e-06	1.50737e-07	1.28449e-06	6.91308e-07	0.00250196	0.00515086
Sum EC70	7.7	0.28503	2.00765e-05	4.30872e-06	1.9906e-05	2.00765e-05	4.30872e-06	4.30319e-08	4.5002e-09	2.41606e-06	1.7125e-07	1.4341e-06	7.82765e-07	1.3958e-05	6.39052e-08	4.50019e-09	2.41605e-06	1.7125e-07	2.12973e-06	1.16246e-06	0.00283474	0.00566149
Sum EC70	7.7	0.28503	2.00581e-05	4.30452e-06	1.98866e-05	2.00581e-05	4.30452e-06	4.29899e-08	4.49582e-09	2.4137e-06	1.71086e-07	1.4327e-06	7.82016e-07	1.39444e-05	6.38429e-08	4.4958e-09	2.41369e-06	1.71086e-07	2.12765e-06	1.16135e-06	0.00285367	0.00570141
Sum EC70	7.8	0.47502	1.92612e-05	3.2507e-06	1.91397e-05	1.92612e-05	3.2507e-06	4.08713e-08	5.38097e-09	2.50791e-06	2.50382e-07	1.69548e-06	9.09083e-07	1.21693e-05	6.49934e-08	5.38096e-09	2.50791e-06	2.50382e-07	2.69614e-06	1.44562e-06	0.00208284	0.00422741
Sum EC70	7.8	0.47502	1.93805e-05	3.27089e-06	1.92586e-05	1.93805e-05	3.27089e-06	4.11252e-08	5.4144e-09	2.52349e-06	2.51927e-07	1.70601e-06	9.14693e-07	1.22449e-05	6.53971e-08	5.41438e-09	2.52348e-06	2.51927e-07	2.71288e-06	1.45454e-06	0.00207857	0.00421832
Sum EC70	7.9	0.6617	1.88875e-05	2.69366e-06	1.87915e-05	1.88875e-05	2.69366e-06	4.26368e-08	7.06687e-09	2.5513e-06	3.42551e-07	1.87789e-06	9.87927e-07	1.10463e-05	7.1015e-08	7.06686e-09	2.5513e-06	3.4255e-07	3.12778e-06	1.64547e-06	0.00165406	0.00343001
Sum EC70	7.9	0.6617	1.93311e-05	2.75705e-06	1.92336e-05	1.93311e-05	2.75705e-06	4.36402e-08	7.23317e-09	2.61133e-06	3.50593e-07	1.92208e-06	1.01112e-06	1.13062e-05	7.26862e-08	7.23316e-09	2.61133e-06	3.50592e-07	3.20138e-06	1.6841e-06	0.00164243	0.00340404
Sum EC20	8.1	0.84722	9.33249e-06	1.15521e-06	9.28574e-06	9.33249e-06	1.15521e-06	2.89803e-08	7.61282e-09	1.27379e-06	2.8272e-07	9.99801e-07	5.14465e-07	5.05935e-06	4.99939e-08	7.61281e-09	1.27379e-06	2.82719e-07	1.72475e-06	8.87503e-07	0.00159167	0.00341894
Sum EC20	8.1	0.84722	9.23506e-06	1.14315e-06	9.18881e-06	9.23506e-06	1.14315e-06	2.86778e-08	7.53335e-09	1.2605e-06	2.79769e-07	9.89365e-07	5.09095e-07	5.00654e-06	4.9472e-08	7.53334e-09	1.26049e-06	2.79768e-07	1.70675e-06	8.78239e-07	0.00159125	0.00341833
Sum EC20	8.1	0.84722	9.079e-06	1.12384e-06	9.03358e-06	9.079e-06	1.12384e-06	2.81934e-08	7.40609e-09	1.2392e-06	2.75041e-07	9.72652e-07	5.00492e-07	4.92196e-06	4.86363e-08	7.40608e-09	1.2392e-06	2.7504e-07	1.67792e-06	8.63397e-07	0.00158901	0.00341566
Sum EC20	8.2	1.0319	9.09968e-06	1.00492e-06	9.06047e-06	9.09968e-06	1.00492e-06	3.17376e-08	1.04958e-08	1.24957e-06	3.58969e-07	1.0335e-06	5.18868e-07	4.63061e-06	5.63149e-08	1.04958e-08	1.24957e-06	3.58969e-07	1.83383e-06	9.20673e-07	0.00135631	0.00295455
Sum EC20	8.2	1.0319	9.12638e-06	1.00783e-06	9.0867e-06	9.12638e-06	1.00783e-06	3.18295e-08	1.05262e-08	1.25319e-06	3.60008e-07	1.03649e-06	5.2037e-07	4.64402e-06	5.64779e-08	1.05262e-08	1.25319e-06	3.60007e-07	1.83914e-06	9.23338e-07	0.00137024	0.0029784
Sum EC20	8.2	1.0319	8.90089e-06	9.82932e-07	8.86223e-06	8.90089e-06	9.82932e-07	3.10431e-08	1.02662e-08	1.22223e-06	3.51122e-07	1.01088e-06	5.07526e-07	4.52928e-06	5.50826e-08	1.02661e-08	1.22222e-06	3.51122e-07	1.7937e-06	9.00549e-07	0.00136772	0.00297655
Sum EC70	8.1	1.03191	2.143e-05	2.39063e-06	2.13532e-05	2.143e-05	2.39063e-06	5.99728e-08	1.57542e-08	2.9723e-06	6.81165e-07	2.45844e-06	1.23952e-06	1.10159e-05	1.06415e-07	1.57542e-08	2.9723e-06	6.81164e-07	4.36224e-06	2.19939e-06	0.00113599	0.00245207
Sum EC70	8.1	1.03192	2.1801e-05	2.43207e-06	2.17232e-05	2.1801e-05	2.43207e-06	6.10124e-08	1.60273e-08	3.02382e-06	6.92944e-07	2.50105e-06	1.26095e-06	1.12068e-05	1.0826e-07	1.60273e-08	3.02382e-06	6.92943e-07	4.43785e-06	2.23742e-06	0.00113155	0.00244161
Sum EC70	8.1	1.03192	2.09809e-05	2.34046e-06	2.09052e-05	2.09809e-05	2.34046e-06	5.87141e-08	1.54236e-08	2.90993e-06	6.66907e-07	2.40686e-06	1.21357e-06	1.07847e-05	1.04182e-07	1.54235e-08	2.90993e-06	6.66906e-07	4.27072e-06	2.15335e-06	0.00114128	0.00246432
Sum EC70	8.1	1.03192	2.08596e-05	2.32691e-06	2.07843e-05	2.08596e-05	2.32691e-06	5.83744e-08	1.53343e-08	2.89309e-06	6.6305e-07	2.39294e-06	1.20655e-06	1.07223e-05	1.03579e-07	1.53343e-08	2.89309e-06	6.63049e-07	4.24601e-06	2.1409e-06	0.00114287	0.00246764
Cu high	7.9	0.65052	0	0	0	0	-	-	-	-	-	-	-	-	-	-	-	-	-	-	0	0
Cu high	7.9	0.65423	0	0	0	0	-	-	-	-	-	-	-	-	-	-	-	-	-	-	0	0
Cu low	7.9	0.66168	0	0	0	0	-	-	-	-	-	-	-	-	-	-	-	-	-	-	0	0
Cu low	7.9	0.66168	0	0	0	0	-	-	-	-	-	-	-	-	-	-	-	-	-	-	0	0
Cu high	8	0.65422	0	0	0	0	-	-	-	-	-	-	-	-	-	-	-	-	-	-	0	0
Cu high	7.9	0.65423	0	0	0	0	-	-	-	-	-	-	-	-	-	-	-	-	-	-	0	0
Cu low	7.9	0.65423	0	0	0	0	-	-	-	-	-	-	-	-	-	-	-	-	-	-	0	0
Cu low	7.9	0.65423	0	0	0	0	-	-	-	-	-	-	-	-	-	-	-	-	-	-	0	0
Cu low	8	0.66168	0	0	0	0	-	-	-	-	-	-	-	-	-	-	-	-	-	-	0	0
Cu low	8	0.66168	0	0	0	0	-	-	-	-	-	-	-	-	-	-	-	-	-	-	0	0
Cu high	7.9	0.65423	0	0	0	0	-	-	-	-	-	-	-	-	-	-	-	-	-	-	0	0
Cu high	7.9	0.65423	0	0	0	0	-	-	-	-	-	-	-	-	-	-	-	-	-	-	0	0
Cu high	7.9	0.66168	0	0	0	0	-	-	-	-	-	-	-	-	-	-	-	-	-	-	0	0
Cu high	7.9	0.66168	0	0	0	0	-	-	-	-	-	-	-	-	-	-	-	-	-	-	0	0
Cu high	7.9	0.65423	0	0	0	0	-	-	-	-	-	-	-	-	-	-	-	-	-	-	0	0
Cu high	7.9	0.65423	0	0	0	0	-	-	-	-	-	-	-	-	-	-	-	-	-	-	0	0
Cu high	7.9	0.65423	0	0	0	0	-	-	-	-	-	-	-	-	-	-	-	-	-	-	0	0
Cu high	7.9	0.65423	0	0	0	0	-	-	-	-	-	-	-	-	-	-	-	-	-	-	0	0
Cu high	8	0.66168	0	0	0	0	-	-	-	-	-	-	-	-	-	-	-	-	-	-	0	0
Cu high	8	0.66168	0	0	0	0	-	-	-	-	-	-	-	-	-	-	-	-	-	-	0	0
Control	7.7	0.27931	0	0	0	0	-	-	-	-	-	-	-	-	-	-	-	-	-	-	0	0
Control	7.7	0.28315	0	0	0	0	-	-	-	-	-	-	-	-	-	-	-	-	-	-	0	0
Control	7.7	0.28499	0	0	0	0	-	-	-	-	-	-	-	-	-	-	-	-	-	-	0	0
Control	7.9	0.34166	0	0	0	0	-	-	-	-	-	-	-	-	-	-	-	-	-	-	0	0
Control	7.9	0.34166	0	0	0	0	-	-	-	-	-	-	-	-	-	-	-	-	-	-	0	0
Control	7.9	0.46939	0	0	0	0	-	-	-	-	-	-	-	-	-	-	-	-	-	-	0	0
Control	7.9	0.47692	0	0	0	0	-	-	-	-	-	-	-	-	-	-	-	-	-	-	0	0
Control	7.9	0.4731	0	0	0	0	-	-	-	-	-	-	-	-	-	-	-	-	-	-	0	0
Control	7.9	0.47499	0	0	0	0	-	-	-	-	-	-	-	-	-	-	-	-	-	-	0	0
Control	7.9	0.47499	0	0	0	0	-	-	-	-	-	-	-	-	-	-	-	-	-	-	0	0
Control	7.9	0.66168	0	0	0	0	-	-	-	-	-	-	-	-	-	-	-	-	-	-	0	0
Control	7.9	0.66168	0	0	0	0	-	-	-	-	-	-	-	-	-	-	-	-	-	-	0	0
Control	8.1	0.8472	0	0	0	0	-	-	-	-	-	-	-	-	-	-	-	-	-	-	0	0
Control	8.1	0.85095	0	0	0	0	-	-	-	-	-	-	-	-	-	-	-	-	-	-	0	0
Control	8.1	0.85274	0	0	0	0	-	-	-	-	-	-	-	-	-	-	-	-	-	-	0	0
Control	8.2	1.0356	0	0	0	0	-	-	-	-	-	-	-	-	-	-	-	-	-	-	0	0
Control	8.2	1.03926	0	0	0	0	-	-	-	-	-	-	-	-	-	-	-	-	-	-	0	0
Control	8.2	1.03739	0	0	0	0	-	-	-	-	-	-	-	-	-	-	-	-	-	-	0	0
Control	8.1	0.65422	0	0	0	0	-	-	-	-	-	-	-	-	-	-	-	-	-	-	0	0
Control	8.1	0.65422	0	0	0	0	-	-	-	-	-	-	-	-	-	-	-	-	-	-	0	0
Control	8.1	0.65422	0	0	0	0	-	-	-	-	-	-	-	-	-	-	-	-	-	-	0	0
Control	8.1	0.65422	0	0	0	0	-	-	-	-	-	-	-	-	-	-	-	-	-	-	0	0
Control	7.9	0.65793	0	0	0	0	-	-	-	-	-	-	-	-	-	-	-	-	-	-	0	0
Control	8	0.65792	0	0	0	0	-	-	-	-	-	-	-	-	-	-	-	-	-	-	0	0
Control	8	0.65422	0	0	0	0	-	-	-	-	-	-	-	-	-	-	-	-	-	-	0	0
Control	8	0.65422	0	0	0	0	-	-	-	-	-	-	-	-	-	-	-	-	-	-	0	0
Control	8	0.64864	0	0	0	0	-	-	-	-	-	-	-	-	-	-	-	-	-	-	0	0
Control	7.9	0.65612	0	0	0	0	-	-	-	-	-	-	-	-	-	-	-	-	-	-	0	0
Control	8	0.66168	0	0	0	0	-	-	-	-	-	-	-	-	-	-	-	-	-	-	0	0
Control	8	0.66168	0	0	0	0	-	-	-	-	-	-	-	-	-	-	-	-	-	-	0	0

## Sheet: Cadmium
Treatment	pH	Ionic strength (M)	Total (M): Cd	Free ion activity (M): Cd	Total true solution concentration (M): Cd	Total aqueous concentration (M): Cd	Activity (M): Cd[2+]	Activity (M): CdOH[+]	Activity (M): Cd(OH)2[0]	Activity (M): CdSO4[0]	Activity (M): CdCl[+]	Activity (M): CdCl2[0]	Activity (M): CdHCO3[+]	Activity (M): CdCO3[0]	Activity (M): Cd(CO3)2[2-]	Aqueous concentration (M): Cd[2+]	Aqueous concentration (M): CdOH[+]	Aqueous concentration (M): Cd(OH)2[0]	Aqueous concentration (M): CdSO4[0]	Aqueous concentration (M): CdCl[+]	Aqueous concentration (M): CdCl2[0]	Aqueous concentration (M): CdHCO3[+]	Aqueous concentration (M): CdCO3[0]	Aqueous concentration (M): Cd(CO3)2[2-]	Fraction bound to colloidal HA : Cd	Fraction bound to colloidal FA : Cd
Cu high	7.7	0.28499	0	0	0	0	-	-	-	-	-	-	-	-	-	-	-	-	-	-	-	-	-	-	0	0
Cu high	7.7	0.28499	0	0	0	0	-	-	-	-	-	-	-	-	-	-	-	-	-	-	-	-	-	-	0	0
Cu high	7.7	0.47499	0	0	0	0	-	-	-	-	-	-	-	-	-	-	-	-	-	-	-	-	-	-	0	0
Cu high	7.8	0.47499	0	0	0	0	-	-	-	-	-	-	-	-	-	-	-	-	-	-	-	-	-	-	0	0
Cu high	7.9	0.66168	0	0	0	0	-	-	-	-	-	-	-	-	-	-	-	-	-	-	-	-	-	-	0	0
Cu high	7.9	0.66168	0	0	0	0	-	-	-	-	-	-	-	-	-	-	-	-	-	-	-	-	-	-	0	0
Cu high	8.1	1.0319	0	0	0	0	-	-	-	-	-	-	-	-	-	-	-	-	-	-	-	-	-	-	0	0
Cu high	8.1	1.0319	0	0	0	0	-	-	-	-	-	-	-	-	-	-	-	-	-	-	-	-	-	-	0	0
Cu high	8.1	1.0319	0	0	0	0	-	-	-	-	-	-	-	-	-	-	-	-	-	-	-	-	-	-	0	0
Cu high	8.1	1.0319	0	0	0	0	-	-	-	-	-	-	-	-	-	-	-	-	-	-	-	-	-	-	0	0
Cd low	7.7	0.28692	1.68029e-07	4.88407e-09	1.66936e-07	1.68029e-07	4.88407e-09	3.70019e-12	1.80995e-15	2.98313e-09	7.06514e-08	4.29345e-08	4.60063e-11	7.99498e-11	4.33364e-14	1.58519e-08	5.49975e-12	1.80994e-15	2.98312e-09	1.05012e-07	4.29343e-08	6.83811e-11	7.99495e-11	1.40654e-13	0.00255406	0.00395643
Cd low	7.7	0.28692	1.66087e-07	4.82748e-09	1.65002e-07	1.66087e-07	4.82748e-09	3.65732e-12	1.78898e-15	2.94856e-09	6.98327e-08	4.2437e-08	4.54732e-11	7.90234e-11	4.28342e-14	1.56682e-08	5.43602e-12	1.78897e-15	2.94855e-09	1.03795e-07	4.24369e-08	6.75888e-11	7.90231e-11	1.39024e-13	0.0025639	0.0039711
Cd low	7.7	0.28692	1.63313e-07	4.74668e-09	1.6224e-07	1.63313e-07	4.74668e-09	3.59611e-12	1.75904e-15	2.89921e-09	6.8664e-08	4.17268e-08	4.47122e-11	7.77008e-11	4.21174e-14	1.5406e-08	5.34504e-12	1.75903e-15	2.8992e-09	1.02058e-07	4.17266e-08	6.64576e-11	7.77006e-11	1.36697e-13	0.00257813	0.0039924
Cd low	7.9	0.47499	1.79e-07	2.88567e-09	1.78388e-07	1.79e-07	2.88567e-09	3.46488e-12	2.68615e-15	2.41703e-09	6.5032e-08	6.15678e-08	4.16918e-11	1.14829e-10	1.51306e-13	1.08026e-08	5.5098e-12	2.68615e-15	2.41702e-09	1.03413e-07	6.15677e-08	6.62976e-11	1.14829e-10	5.66417e-13	0.00130001	0.00212518
Cd low	8	0.47499	1.7286e-07	2.78594e-09	1.72254e-07	1.7286e-07	2.78594e-09	4.21128e-12	4.11014e-15	2.33355e-09	6.27845e-08	5.94402e-08	4.03081e-11	1.39763e-10	2.32173e-13	1.04293e-08	6.69671e-12	4.11013e-15	2.33355e-09	9.98389e-08	5.944e-08	6.40972e-11	1.39763e-10	8.69148e-13	0.00131738	0.00219061
Cd low	8	0.47499	1.76334e-07	2.84198e-09	1.75718e-07	1.76334e-07	2.84198e-09	4.29599e-12	4.19281e-15	2.38049e-09	6.40474e-08	6.06358e-08	4.11189e-11	1.42574e-10	2.36844e-13	1.0639e-08	6.83141e-12	4.1928e-15	2.38049e-09	1.01847e-07	6.06357e-08	6.53866e-11	1.42574e-10	8.8663e-13	0.00131196	0.00218034
Cd high	7.7	0.28499	2.47918e-05	7.29756e-07	2.47555e-05	2.47918e-05	7.29756e-07	5.52866e-10	2.70434e-13	4.44308e-07	1.04943e-05	6.33985e-06	6.83642e-09	1.18803e-08	6.40443e-12	2.36394e-06	8.21028e-10	2.70433e-13	4.44307e-07	1.55845e-05	6.33983e-06	1.01524e-08	1.18803e-08	2.07462e-11	0.00050042	0.000966278
Cd high	7.7	0.28499	2.47347e-05	7.28073e-07	2.46985e-05	2.47347e-05	7.28073e-07	5.51591e-10	2.69811e-13	4.43284e-07	1.04701e-05	6.32524e-06	6.82066e-09	1.1853e-08	6.38966e-12	2.35849e-06	8.19135e-10	2.6981e-13	4.43283e-07	1.55486e-05	6.32522e-06	1.0129e-08	1.18529e-08	2.06984e-11	0.000500826	0.000967
Cd high	7.8	0.47499	2.2139e-05	3.57919e-07	2.21208e-05	2.2139e-05	3.57919e-07	3.41371e-10	2.10218e-13	2.99782e-07	8.06556e-06	7.63539e-06	5.15357e-09	1.12748e-08	1.17606e-11	1.33988e-06	5.42842e-10	2.10217e-13	2.99781e-07	1.28257e-05	7.63537e-06	8.1951e-09	1.12747e-08	4.40262e-11	0.000279358	0.000543645
Cd high	7.8	0.47499	2.22717e-05	3.60065e-07	2.22535e-05	2.22717e-05	3.60065e-07	3.43418e-10	2.11478e-13	3.01579e-07	8.11392e-06	7.68117e-06	5.18447e-09	1.13424e-08	1.18312e-11	1.34791e-06	5.46097e-10	2.11478e-13	3.01578e-07	1.29026e-05	7.68115e-06	8.24424e-09	1.13423e-08	4.42901e-11	0.00027889	0.000542729
Cd high	7.9	0.66168	2.44291e-05	2.61158e-07	2.44164e-05	2.44291e-05	2.61158e-07	3.13578e-10	2.43102e-13	2.68522e-07	7.86605e-06	9.95307e-06	4.92812e-09	1.35732e-08	2.33592e-11	1.07096e-06	5.22286e-10	2.43101e-13	2.68521e-07	1.31015e-05	9.95305e-06	8.20812e-09	1.35731e-08	9.57913e-11	0.000174133	0.000344458
Cd high	7.9	0.66168	2.41182e-05	2.57834e-07	2.41057e-05	2.41182e-05	2.57834e-07	3.09587e-10	2.40008e-13	2.65104e-07	7.76595e-06	9.82641e-06	4.8654e-09	1.34004e-08	2.30619e-11	1.05733e-06	5.15639e-10	2.40007e-13	2.65104e-07	1.29347e-05	9.82639e-06	8.10366e-09	1.34004e-08	9.45722e-11	0.000174712	0.000345575
Cd low	8.1	0.8472	1.85512e-07	1.43657e-09	1.85255e-07	1.85512e-07	1.43657e-09	2.73381e-12	3.359e-15	1.71944e-09	5.37147e-08	8.43736e-08	3.28977e-11	1.43604e-10	4.7534e-13	6.29154e-09	4.71607e-12	3.359e-15	1.71944e-09	9.26628e-08	8.43735e-08	5.67515e-11	1.43603e-10	2.08178e-12	0.000499512	0.000888719
Cd low	8.1	0.8472	1.88224e-07	1.45757e-09	1.87963e-07	1.88224e-07	1.45757e-09	2.77378e-12	3.40812e-15	1.74459e-09	5.45001e-08	8.56073e-08	3.33787e-11	1.45703e-10	4.8229e-13	6.38354e-09	4.78503e-12	3.40811e-15	1.74458e-09	9.40177e-08	8.56072e-08	5.75814e-11	1.45703e-10	2.11222e-12	0.000498849	0.000887187
Cd low	8.1	0.8472	1.86558e-07	1.44467e-09	1.86299e-07	1.86558e-07	1.44467e-09	2.74923e-12	3.37795e-15	1.72914e-09	5.40176e-08	8.48494e-08	3.30832e-11	1.44413e-10	4.7802e-13	6.32703e-09	4.74267e-12	3.37794e-15	1.72914e-09	9.31853e-08	8.48493e-08	5.70716e-11	1.44413e-10	2.09352e-12	0.000499256	0.000888127
Cd low	8.2	1.03188	1.82238e-07	1.08413e-09	1.82058e-07	1.82238e-07	1.08413e-09	2.59731e-12	4.0176e-15	1.46328e-09	4.81696e-08	8.99107e-08	2.87761e-11	1.58136e-10	7.63803e-13	4.99558e-09	4.60863e-12	4.01759e-15	1.46328e-09	8.54714e-08	8.99106e-08	5.10599e-11	1.58136e-10	3.51954e-12	0.000347177	0.000639567
Cd low	8.2	1.03188	1.81999e-07	1.08271e-09	1.8182e-07	1.81999e-07	1.08271e-09	2.59391e-12	4.01233e-15	1.46136e-09	4.81065e-08	8.97928e-08	2.87384e-11	1.57929e-10	7.62802e-13	4.98903e-09	4.60259e-12	4.01232e-15	1.46136e-09	8.53593e-08	8.97927e-08	5.09929e-11	1.57929e-10	3.51492e-12	0.000347206	0.000639638
Cd low	8.2	1.03188	1.79757e-07	1.06937e-09	1.7958e-07	1.79757e-07	1.06937e-09	2.56196e-12	3.96291e-15	1.44336e-09	4.75139e-08	8.86867e-08	2.83844e-11	1.55984e-10	7.53406e-13	4.92758e-09	4.54589e-12	3.9629e-15	1.44336e-09	8.43079e-08	8.86866e-08	5.03648e-11	1.55983e-10	3.47162e-12	0.000347474	0.0006403
Cd high	8.1	1.03189	2.39788e-05	1.42786e-07	2.39721e-05	2.39788e-05	1.42786e-07	2.71723e-10	3.33864e-13	1.9271e-07	6.34392e-06	1.18407e-05	3.80744e-09	1.66201e-08	6.40593e-11	6.57945e-07	4.82142e-10	3.33863e-13	1.9271e-07	1.12566e-05	1.18407e-05	6.75587e-09	1.66201e-08	2.9518e-10	9.38934e-05	0.000187874
Cd high	8.1	1.03189	2.36778e-05	1.40993e-07	2.36711e-05	2.36778e-05	1.40993e-07	2.68311e-10	3.29671e-13	1.9029e-07	6.26426e-06	1.1692e-05	3.75963e-09	1.64114e-08	6.32548e-11	6.49683e-07	4.76088e-10	3.29671e-13	1.9029e-07	1.11152e-05	1.1692e-05	6.67104e-09	1.64114e-08	2.91473e-10	9.42313e-05	0.000188433
Cd high	8.1	1.03189	2.68075e-05	1.59632e-07	2.68002e-05	2.68075e-05	1.59632e-07	3.03781e-10	3.73253e-13	2.15446e-07	7.09235e-06	1.32376e-05	4.25664e-09	1.85809e-08	7.16169e-11	7.35569e-07	5.39025e-10	3.73253e-13	2.15445e-07	1.25846e-05	1.32375e-05	7.55293e-09	1.85809e-08	3.30005e-10	9.1006e-05	0.00018303
Cd high	8.2	1.03187	2.68495e-05	1.59851e-07	2.6842e-05	2.68495e-05	1.59851e-07	3.82963e-10	5.92379e-13	2.15754e-07	7.10211e-06	1.32558e-05	4.24288e-09	2.33164e-08	1.12618e-10	7.36576e-07	6.79523e-10	5.92378e-13	2.15754e-07	1.26018e-05	1.32558e-05	7.52849e-09	2.33163e-08	5.18931e-10	9.17541e-05	0.000187039
Pb high	7.7	0.28499	0	0	0	0	-	-	-	-	-	-	-	-	-	-	-	-	-	-	-	-	-	-	0	0
Pb high	7.7	0.28499	0	0	0	0	-	-	-	-	-	-	-	-	-	-	-	-	-	-	-	-	-	-	0	0
Pb high	7.8	0.47499	0	0	0	0	-	-	-	-	-	-	-	-	-	-	-	-	-	-	-	-	-	-	0	0
Pb high	7.8	0.47499	0	0	0	0	-	-	-	-	-	-	-	-	-	-	-	-	-	-	-	-	-	-	0	0
Pb low	7.9	0.66168	0	0	0	0	-	-	-	-	-	-	-	-	-	-	-	-	-	-	-	-	-	-	0	0
Pb low	7.9	0.66168	0	0	0	0	-	-	-	-	-	-	-	-	-	-	-	-	-	-	-	-	-	-	0	0
Pb low	8.2	1.03188	0	0	0	0	-	-	-	-	-	-	-	-	-	-	-	-	-	-	-	-	-	-	0	0
Pb low	8.2	1.03188	0	0	0	0	-	-	-	-	-	-	-	-	-	-	-	-	-	-	-	-	-	-	0	0
Pb low	8.2	1.03188	0	0	0	0	-	-	-	-	-	-	-	-	-	-	-	-	-	-	-	-	-	-	0	0
Pb low	8.1	1.0319	0	0	0	0	-	-	-	-	-	-	-	-	-	-	-	-	-	-	-	-	-	-	0	0
Zn low	7.7	0.28693	0	0	0	0	-	-	-	-	-	-	-	-	-	-	-	-	-	-	-	-	-	-	0	0
Zn low	7.7	0.28693	0	0	0	0	-	-	-	-	-	-	-	-	-	-	-	-	-	-	-	-	-	-	0	0
Zn low	7.7	0.28693	0	0	0	0	-	-	-	-	-	-	-	-	-	-	-	-	-	-	-	-	-	-	0	0
Zn low	7.9	0.475	0	0	0	0	-	-	-	-	-	-	-	-	-	-	-	-	-	-	-	-	-	-	0	0
Zn low	7.9	0.475	0	0	0	0	-	-	-	-	-	-	-	-	-	-	-	-	-	-	-	-	-	-	0	0
Zn low	7.9	0.475	0	0	0	0	-	-	-	-	-	-	-	-	-	-	-	-	-	-	-	-	-	-	0	0
Zn high	7.7	0.28501	0	0	0	0	-	-	-	-	-	-	-	-	-	-	-	-	-	-	-	-	-	-	0	0
Zn high	7.7	0.28694	0	0	0	0	-	-	-	-	-	-	-	-	-	-	-	-	-	-	-	-	-	-	0	0
Zn high	7.8	0.47501	0	0	0	0	-	-	-	-	-	-	-	-	-	-	-	-	-	-	-	-	-	-	0	0
Zn high	7.8	0.47501	0	0	0	0	-	-	-	-	-	-	-	-	-	-	-	-	-	-	-	-	-	-	0	0
Zn high	7.9	0.6617	0	0	0	0	-	-	-	-	-	-	-	-	-	-	-	-	-	-	-	-	-	-	0	0
Zn high	7.9	0.6617	0	0	0	0	-	-	-	-	-	-	-	-	-	-	-	-	-	-	-	-	-	-	0	0
Zn low	8.1	0.84721	0	0	0	0	-	-	-	-	-	-	-	-	-	-	-	-	-	-	-	-	-	-	0	0
Zn low	8.1	0.84721	0	0	0	0	-	-	-	-	-	-	-	-	-	-	-	-	-	-	-	-	-	-	0	0
Zn low	8.1	0.84721	0	0	0	0	-	-	-	-	-	-	-	-	-	-	-	-	-	-	-	-	-	-	0	0
Zn low	8.2	1.03189	0	0	0	0	-	-	-	-	-	-	-	-	-	-	-	-	-	-	-	-	-	-	0	0
Zn low	8.2	1.03189	0	0	0	0	-	-	-	-	-	-	-	-	-	-	-	-	-	-	-	-	-	-	0	0
Zn low	8.2	1.03189	0	0	0	0	-	-	-	-	-	-	-	-	-	-	-	-	-	-	-	-	-	-	0	0
Zn high	8.1	1.03192	0	0	0	0	-	-	-	-	-	-	-	-	-	-	-	-	-	-	-	-	-	-	0	0
Zn high	8.1	1.03192	0	0	0	0	-	-	-	-	-	-	-	-	-	-	-	-	-	-	-	-	-	-	0	0
Zn high	8.1	1.03192	0	0	0	0	-	-	-	-	-	-	-	-	-	-	-	-	-	-	-	-	-	-	0	0
Zn high	8.1	1.03192	0	0	0	0	-	-	-	-	-	-	-	-	-	-	-	-	-	-	-	-	-	-	0	0
Ni high	7.8	0.28501	0	0	0	0	-	-	-	-	-	-	-	-	-	-	-	-	-	-	-	-	-	-	0	0
Ni high	7.7	0.28501	0	0	0	0	-	-	-	-	-	-	-	-	-	-	-	-	-	-	-	-	-	-	0	0
Ni high	7.8	0.47501	0	0	0	0	-	-	-	-	-	-	-	-	-	-	-	-	-	-	-	-	-	-	0	0
Ni high	7.8	0.47501	0	0	0	0	-	-	-	-	-	-	-	-	-	-	-	-	-	-	-	-	-	-	0	0
Ni high	7.9	0.6617	0	0	0	0	-	-	-	-	-	-	-	-	-	-	-	-	-	-	-	-	-	-	0	0
Ni high	7.9	0.6617	0	0	0	0	-	-	-	-	-	-	-	-	-	-	-	-	-	-	-	-	-	-	0	0
Ni high	8.1	0.84722	0	0	0	0	-	-	-	-	-	-	-	-	-	-	-	-	-	-	-	-	-	-	0	0
Ni high	8.1	0.84722	0	0	0	0	-	-	-	-	-	-	-	-	-	-	-	-	-	-	-	-	-	-	0	0
Ni high	8.1	0.84722	0	0	0	0	-	-	-	-	-	-	-	-	-	-	-	-	-	-	-	-	-	-	0	0
Ni high	8.2	1.0319	0	0	0	0	-	-	-	-	-	-	-	-	-	-	-	-	-	-	-	-	-	-	0	0
Ni high	8.2	1.0319	0	0	0	0	-	-	-	-	-	-	-	-	-	-	-	-	-	-	-	-	-	-	0	0
Ni high	8.2	1.0319	0	0	0	0	-	-	-	-	-	-	-	-	-	-	-	-	-	-	-	-	-	-	0	0
Ni high	8.2	1.0319	0	0	0	0	-	-	-	-	-	-	-	-	-	-	-	-	-	-	-	-	-	-	0	0
Sum EC10	7.7	0.28694	1.83802e-07	5.37451e-09	1.83696e-07	1.83802e-07	5.37451e-09	4.07175e-12	1.9917e-15	3.28222e-09	7.77447e-08	4.72443e-08	5.04887e-11	8.77393e-11	4.74296e-14	1.74439e-08	6.05206e-12	1.99169e-15	3.28221e-09	1.15556e-07	4.72442e-08	7.50441e-11	8.7739e-11	1.53941e-13	0.0001885	0.000392207
Sum EC10	7.7	0.28694	1.89111e-07	5.52985e-09	1.89005e-07	1.89111e-07	5.52985e-09	4.18944e-12	2.04926e-15	3.37706e-09	7.99917e-08	4.86098e-08	5.19395e-11	9.02605e-11	4.87846e-14	1.79481e-08	6.22699e-12	2.04926e-15	3.37705e-09	1.18896e-07	4.86096e-08	7.72005e-11	9.02602e-11	1.58339e-13	0.000183004	0.000380747
Sum EC10	7.7	0.28694	1.91727e-07	5.60634e-09	1.91619e-07	1.91727e-07	5.60634e-09	4.24738e-12	2.07761e-15	3.42377e-09	8.10981e-08	4.92821e-08	5.26586e-11	9.15101e-11	4.94606e-14	1.81964e-08	6.31311e-12	2.0776e-15	3.42376e-09	1.2054e-07	4.92819e-08	7.82693e-11	9.15098e-11	1.60533e-13	0.000183231	0.000381296
Sum EC10	7.9	0.47501	1.97623e-07	3.19594e-09	1.97565e-07	1.97623e-07	3.19594e-09	3.83743e-12	2.97497e-15	2.67666e-09	7.20235e-08	6.81862e-08	4.60651e-11	1.26874e-10	1.6678e-13	1.19642e-08	6.10224e-12	2.97496e-15	2.67665e-09	1.14531e-07	6.81861e-08	7.32522e-11	1.26873e-10	6.24353e-13	9.43526e-05	0.000202308
Sum EC10	7.9	0.47501	1.9471e-07	3.14882e-09	1.94653e-07	1.9471e-07	3.14882e-09	3.78086e-12	2.93111e-15	2.63721e-09	7.09617e-08	6.7181e-08	4.53884e-11	1.2501e-10	1.6434e-13	1.17878e-08	6.01228e-12	2.93111e-15	2.6372e-09	1.12843e-07	6.71809e-08	7.21762e-11	1.2501e-10	6.15216e-13	9.38218e-05	0.000201574
Sum EC10	7.9	0.47501	1.92057e-07	3.10591e-09	1.92e-07	1.92057e-07	3.10591e-09	3.72933e-12	2.89117e-15	2.60127e-09	6.99947e-08	6.62655e-08	4.47708e-11	1.23309e-10	1.62107e-13	1.16272e-08	5.93035e-12	2.89116e-15	2.60126e-09	1.11305e-07	6.62654e-08	7.11941e-11	1.23309e-10	6.06856e-13	9.44383e-05	0.000202931
Sum EC50	7.7	0.28501	2.24615e-05	6.61835e-07	2.24512e-05	2.24615e-05	6.61835e-07	5.01409e-10	2.45264e-13	4.02865e-07	9.51747e-06	5.74964e-06	6.17836e-09	1.07368e-08	5.76762e-12	2.14397e-06	7.44621e-10	2.45263e-13	4.02864e-07	1.4134e-05	5.74962e-06	9.17522e-09	1.07367e-08	1.86839e-11	0.000148915	0.000313822
Sum EC50	7.7	0.28501	2.2998e-05	6.77647e-07	2.29875e-05	2.2998e-05	6.77647e-07	5.13388e-10	2.51124e-13	4.12487e-07	9.74482e-06	5.88696e-06	6.32558e-09	1.09926e-08	5.9047e-12	2.1952e-06	7.62411e-10	2.51123e-13	4.12486e-07	1.44716e-05	5.88694e-06	9.39386e-09	1.09926e-08	1.91279e-11	0.000147229	0.000310449
Sum EC50	7.8	0.47501	2.24962e-05	3.63916e-07	2.2491e-05	2.24962e-05	3.63916e-07	3.47091e-10	2.1374e-13	3.04761e-07	8.20056e-06	7.76306e-06	5.22628e-09	1.14339e-08	1.18956e-11	1.36234e-06	5.51941e-10	2.13739e-13	3.04761e-07	1.30405e-05	7.76304e-06	8.31079e-09	1.14338e-08	4.45319e-11	7.44008e-05	0.000159911
Sum EC50	7.8	0.47501	2.26288e-05	3.6606e-07	2.26235e-05	2.26288e-05	3.6606e-07	3.49136e-10	2.14999e-13	3.06557e-07	8.24888e-06	7.8088e-06	5.2571e-09	1.15013e-08	1.19658e-11	1.37037e-06	5.55193e-10	2.14999e-13	3.06557e-07	1.31173e-05	7.80878e-06	8.3598e-09	1.15013e-08	4.47947e-11	7.42552e-05	0.00015965
Sum EC50	7.9	0.6617	2.15908e-05	2.30902e-07	2.15876e-05	2.15908e-05	2.30902e-07	2.77249e-10	2.14938e-13	2.37391e-07	6.95473e-06	8.79991e-06	4.34814e-09	1.19758e-08	2.05674e-11	9.4689e-07	4.6178e-10	2.14937e-13	2.3739e-07	1.15836e-05	8.7999e-06	7.24216e-09	1.19758e-08	8.43431e-11	4.73773e-05	0.000103721
Sum EC50	7.9	0.6617	2.18403e-05	2.33572e-07	2.18371e-05	2.18403e-05	2.33572e-07	2.80454e-10	2.17422e-13	2.40134e-07	7.03511e-06	8.90162e-06	4.39815e-09	1.21135e-08	2.08027e-11	9.57837e-07	4.67118e-10	2.17422e-13	2.40134e-07	1.17175e-05	8.90161e-06	7.32545e-09	1.21135e-08	8.53082e-11	4.58865e-05	0.000100626
Sum EC10	8.1	0.84722	2.11196e-07	1.63754e-09	2.1117e-07	2.11196e-07	1.63754e-09	3.11627e-12	3.82893e-15	1.95989e-09	6.1229e-08	9.61762e-08	3.7433e-11	1.63401e-10	5.39904e-13	7.17176e-09	5.37586e-12	3.82892e-15	1.95989e-09	1.05626e-07	9.61761e-08	6.45755e-11	1.63401e-10	2.36455e-12	3.91049e-05	8.59509e-05
Sum EC10	8.1	0.84722	2.108e-07	1.63448e-09	2.10774e-07	2.108e-07	1.63448e-09	3.11043e-12	3.82176e-15	1.95622e-09	6.11143e-08	9.59961e-08	3.7362e-11	1.63091e-10	5.38867e-13	7.15833e-09	5.3658e-12	3.82175e-15	1.95622e-09	1.05428e-07	9.5996e-08	6.4453e-11	1.63091e-10	2.36001e-12	3.87339e-05	8.52842e-05
Sum EC10	8.1	0.84722	2.08572e-07	1.61721e-09	2.08547e-07	2.08572e-07	1.61721e-09	3.07757e-12	3.78138e-15	1.93555e-09	6.04685e-08	9.49818e-08	3.69672e-11	1.61368e-10	5.33173e-13	7.08269e-09	5.3091e-12	3.78137e-15	1.93555e-09	1.04314e-07	9.49817e-08	6.3772e-11	1.61368e-10	2.33508e-12	3.85007e-05	8.48903e-05
Sum EC10	8.2	1.0319	1.96929e-07	1.17258e-09	1.9691e-07	1.96929e-07	1.17258e-09	2.80922e-12	4.34539e-15	1.5826e-09	5.20994e-08	9.72453e-08	3.10733e-11	1.7076e-10	8.23435e-13	5.40318e-09	4.98465e-12	4.34538e-15	1.5826e-09	9.24446e-08	9.72452e-08	5.5136e-11	1.7076e-10	3.79433e-12	2.97784e-05	6.53288e-05
Sum EC10	8.2	1.0319	1.88642e-07	1.12324e-09	1.88625e-07	1.88642e-07	1.12324e-09	2.69101e-12	4.16253e-15	1.51601e-09	4.99071e-08	9.31533e-08	2.97673e-11	1.63583e-10	7.8887e-13	5.17581e-09	4.77489e-12	4.16253e-15	1.516e-09	8.85545e-08	9.31532e-08	5.28187e-11	1.63583e-10	3.63505e-12	3.01281e-05	6.59626e-05
Sum EC10	8.2	1.0319	1.91518e-07	1.14037e-09	1.915e-07	1.91518e-07	1.14037e-09	2.73204e-12	4.22599e-15	1.53912e-09	5.06679e-08	9.45734e-08	3.02203e-11	1.66073e-10	8.00851e-13	5.25472e-09	4.84769e-12	4.22598e-15	1.53911e-09	8.99045e-08	9.45733e-08	5.36224e-11	1.66072e-10	3.69026e-12	2.93485e-05	6.46076e-05
Sum EC50	8.1	1.03191	2.45702e-05	1.46339e-07	2.45684e-05	2.45702e-05	1.46339e-07	2.78486e-10	3.42173e-13	1.97494e-07	6.50175e-06	1.21352e-05	3.89561e-09	1.7005e-08	6.54319e-11	6.74322e-07	4.94142e-10	3.42172e-13	1.97494e-07	1.15366e-05	1.21352e-05	6.91233e-09	1.70049e-08	3.01506e-10	2.3466e-05	5.30104e-05
Sum EC50	8.1	1.03191	2.50386e-05	1.49129e-07	2.50367e-05	2.50386e-05	1.49129e-07	2.83794e-10	3.48695e-13	2.01258e-07	6.62569e-06	1.23665e-05	3.96971e-09	1.73284e-08	6.66739e-11	6.87177e-07	5.03562e-10	3.48695e-13	2.01258e-07	1.17566e-05	1.23665e-05	7.04382e-09	1.73284e-08	3.07229e-10	2.30709e-05	5.22088e-05
Sum EC50	8.1	1.03191	2.72419e-05	1.62253e-07	2.72399e-05	2.72419e-05	1.62253e-07	3.08769e-10	3.79381e-13	2.1897e-07	7.20874e-06	1.34547e-05	4.31894e-09	1.88529e-08	7.25375e-11	7.4765e-07	5.47877e-10	3.79381e-13	2.18969e-07	1.27911e-05	1.34547e-05	7.66348e-09	1.88528e-08	3.34248e-10	2.30774e-05	5.22227e-05
Sum EC50	8.1	1.03191	2.70904e-05	1.61351e-07	2.70884e-05	2.70904e-05	1.61351e-07	3.07052e-10	3.77272e-13	2.17752e-07	7.16866e-06	1.33799e-05	4.29495e-09	1.87481e-08	7.21349e-11	7.43493e-07	5.44831e-10	3.77272e-13	2.17752e-07	1.272e-05	1.33799e-05	7.62091e-09	1.87481e-08	3.32393e-10	2.33306e-05	5.27003e-05
Sum EC10 -Cu	7.7	0.28694	1.7478e-07	5.11022e-09	1.74663e-07	1.7478e-07	5.11022e-09	3.87152e-12	1.89376e-15	3.12082e-09	7.39217e-08	4.49211e-08	4.80054e-11	8.34238e-11	4.50963e-14	1.65861e-08	5.75445e-12	1.89375e-15	3.12081e-09	1.09874e-07	4.4921e-08	7.1353e-11	8.34236e-11	1.46368e-13	0.000220347	0.000452054
Sum EC10 -Cu	7.7	0.28694	1.76242e-07	5.15298e-09	1.76124e-07	1.76242e-07	5.15298e-09	3.90392e-12	1.9096e-15	3.14693e-09	7.45401e-08	4.5297e-08	4.84049e-11	8.41181e-11	4.54696e-14	1.67249e-08	5.8026e-12	1.90959e-15	3.14692e-09	1.10793e-07	4.52968e-08	7.19468e-11	8.41178e-11	1.4758e-13	0.000219496	0.000449792
Sum EC10 -Cu	7.7	0.28694	1.75667e-07	5.13618e-09	1.7555e-07	1.75667e-07	5.13618e-09	3.89119e-12	1.90338e-15	3.13667e-09	7.42972e-08	4.51493e-08	4.82469e-11	8.38436e-11	4.5321e-14	1.66704e-08	5.78368e-12	1.90337e-15	3.13666e-09	1.10432e-07	4.51492e-08	7.1712e-11	8.38433e-11	1.47097e-13	0.000219716	0.000449962
Sum EC10 -Cu	7.9	0.47501	1.7699e-07	2.86204e-09	1.76924e-07	1.7699e-07	2.86204e-09	3.43651e-12	2.66416e-15	2.39703e-09	6.44988e-08	6.10625e-08	4.12571e-11	1.13631e-10	1.4939e-13	1.07142e-08	5.4647e-12	2.66415e-15	2.39703e-09	1.02565e-07	6.10623e-08	6.56066e-11	1.13631e-10	5.59251e-13	0.000120907	0.000253176
Sum EC10 -Cu	7.9	0.47501	1.76775e-07	2.85856e-09	1.76709e-07	1.76775e-07	2.85856e-09	3.43233e-12	2.66092e-15	2.39412e-09	6.44204e-08	6.09882e-08	4.12062e-11	1.13491e-10	1.49203e-13	1.07012e-08	5.45806e-12	2.66091e-15	2.39411e-09	1.02441e-07	6.09881e-08	6.55257e-11	1.13491e-10	5.58552e-13	0.000120231	0.000251936
Sum EC10 -Cu	7.9	0.47501	1.75776e-07	2.84241e-09	1.75711e-07	1.75776e-07	2.84241e-09	3.41295e-12	2.64589e-15	2.38059e-09	6.40565e-08	6.06438e-08	4.09732e-11	1.1285e-10	1.48359e-13	1.06408e-08	5.42723e-12	2.64588e-15	2.38059e-09	1.01862e-07	6.06436e-08	6.51552e-11	1.12849e-10	5.5539e-13	0.000119996	0.00025139
Sum EC10 -Cu	8.1	0.84722	1.83844e-07	1.42539e-09	1.83812e-07	1.83844e-07	1.42539e-09	2.71255e-12	3.33288e-15	1.70599e-09	5.32966e-08	8.37164e-08	3.25874e-11	1.42249e-10	4.70071e-13	6.24263e-09	4.6794e-12	3.33287e-15	1.70599e-09	9.19417e-08	8.37163e-08	5.62163e-11	1.42249e-10	2.05872e-12	5.62231e-05	0.000119254
Sum EC10 -Cu	8.1	0.84722	1.85046e-07	1.43472e-09	1.85015e-07	1.85046e-07	1.43472e-09	2.7303e-12	3.35469e-15	1.71715e-09	5.36453e-08	8.42642e-08	3.27981e-11	1.43169e-10	4.73073e-13	6.28348e-09	4.71002e-12	3.35468e-15	1.71715e-09	9.25434e-08	8.42641e-08	5.65798e-11	1.43168e-10	2.07186e-12	5.47416e-05	0.000116323
Sum EC10 -Cu	8.1	0.84722	1.84982e-07	1.43422e-09	1.8495e-07	1.84982e-07	1.43422e-09	2.72934e-12	3.35351e-15	1.71655e-09	5.36266e-08	8.42348e-08	3.27883e-11	1.43126e-10	4.72956e-13	6.28129e-09	4.70838e-12	3.35351e-15	1.71655e-09	9.2511e-08	8.42347e-08	5.65629e-11	1.43126e-10	2.07135e-12	5.56793e-05	0.000118206
Sum EC10 -Cu	8.2	1.0319	1.77798e-07	1.05863e-09	1.77775e-07	1.77798e-07	1.05863e-09	2.53622e-12	3.9231e-15	1.42881e-09	4.70364e-08	8.77951e-08	2.80556e-11	1.54177e-10	7.43522e-13	4.87809e-09	4.50024e-12	3.92309e-15	1.4288e-09	8.34608e-08	8.77949e-08	4.97815e-11	1.54177e-10	3.42609e-12	4.1562e-05	8.90243e-05
Sum EC10 -Cu	8.2	1.0319	1.78942e-07	1.06545e-09	1.78919e-07	1.78942e-07	1.06545e-09	2.55255e-12	3.94836e-15	1.43801e-09	4.73393e-08	8.83604e-08	2.82358e-11	1.55167e-10	7.48285e-13	4.90951e-09	4.52922e-12	3.94836e-15	1.438e-09	8.39982e-08	8.83603e-08	5.01012e-11	1.55167e-10	3.44804e-12	4.12111e-05	8.83372e-05
Sum EC10 -Cu	8.2	1.0319	1.7958e-07	1.06925e-09	1.79557e-07	1.7958e-07	1.06925e-09	2.56165e-12	3.96244e-15	1.44313e-09	4.7508e-08	8.86754e-08	2.83365e-11	1.55721e-10	7.50956e-13	4.92701e-09	4.54536e-12	3.96243e-15	1.44313e-09	8.42976e-08	8.86753e-08	5.02799e-11	1.5572e-10	3.46035e-12	4.13634e-05	8.86327e-05
Sum EC50 -Cu	8.2	1.03189	2.62302e-05	1.56191e-07	2.62273e-05	2.62302e-05	1.56191e-07	3.74196e-10	5.78816e-13	2.10802e-07	6.93947e-06	1.29522e-05	4.13838e-09	2.27421e-08	1.09649e-10	7.19715e-07	6.63967e-10	5.78816e-13	2.10802e-07	1.23133e-05	1.29522e-05	7.34307e-09	2.2742e-08	5.05252e-10	3.53006e-05	7.68986e-05
Sum EC50 -Cu	8.1	1.03191	2.66287e-05	1.58595e-07	2.66258e-05	2.66287e-05	1.58595e-07	3.01808e-10	3.70829e-13	2.14034e-07	7.04624e-06	1.31514e-05	4.22188e-09	1.84292e-08	7.09126e-11	7.30795e-07	5.35526e-10	3.70828e-13	2.14033e-07	1.25028e-05	1.31514e-05	7.49127e-09	1.84292e-08	3.26761e-10	3.42918e-05	7.39446e-05
Sum EC50 -Cu	8.1	1.03191	2.38331e-05	1.41944e-07	2.38305e-05	2.38331e-05	1.41944e-07	2.70121e-10	3.31895e-13	1.91562e-07	6.30647e-06	1.17707e-05	3.77866e-09	1.64945e-08	6.34688e-11	6.54068e-07	4.793e-10	3.31894e-13	1.91562e-07	1.11901e-05	1.17707e-05	6.70482e-09	1.64944e-08	2.9246e-10	3.46735e-05	7.46867e-05
Sum EC50 -Cu	8.1	1.03191	2.36426e-05	1.40809e-07	2.364e-05	2.36426e-05	1.40809e-07	2.67962e-10	3.29242e-13	1.90031e-07	6.25607e-06	1.16767e-05	3.74854e-09	1.6363e-08	6.29641e-11	6.4884e-07	4.75469e-10	3.29242e-13	1.90031e-07	1.11007e-05	1.16766e-05	6.65137e-09	1.63629e-08	2.90135e-10	3.48538e-05	7.50565e-05
Sum EC20	7.7	0.28695	2.65879e-07	7.77531e-09	2.65751e-07	2.65879e-07	7.77531e-09	5.8906e-12	2.88139e-15	4.74804e-09	1.12472e-07	6.83472e-08	7.29307e-11	1.26739e-10	6.84074e-14	2.52364e-08	8.75555e-12	2.88138e-15	4.74802e-09	1.67174e-07	6.8347e-08	1.08401e-10	1.26739e-10	2.2203e-13	0.000157788	0.000328175
Sum EC20	7.7	0.28695	2.68465e-07	7.8509e-09	2.68334e-07	2.68465e-07	7.8509e-09	5.94787e-12	2.9094e-15	4.79421e-09	1.13566e-07	6.90117e-08	7.36438e-11	1.27978e-10	6.90801e-14	2.54817e-08	8.84067e-12	2.90939e-15	4.79419e-09	1.688e-07	6.90115e-08	1.09461e-10	1.27978e-10	2.24214e-13	0.000159376	0.000331685
Sum EC20	7.7	0.28695	2.67742e-07	7.82982e-09	2.67614e-07	2.67742e-07	7.82982e-09	5.9319e-12	2.90159e-15	4.78133e-09	1.13261e-07	6.88264e-08	7.34405e-11	1.27625e-10	6.88842e-14	2.54133e-08	8.81694e-12	2.90158e-15	4.78131e-09	1.68346e-07	6.88262e-08	1.09159e-10	1.27625e-10	2.23578e-13	0.000156044	0.000324665
Sum EC20	7.9	0.47501	2.88281e-07	4.66226e-09	2.88208e-07	2.88281e-07	4.66226e-09	5.59807e-12	4.33991e-15	3.90458e-09	1.05068e-07	9.94696e-08	6.71271e-11	1.84883e-10	2.42772e-13	1.74535e-08	8.90201e-12	4.3399e-15	3.90457e-09	1.67078e-07	9.94694e-08	1.06745e-10	1.84883e-10	9.08837e-13	8.16499e-05	0.000175852
Sum EC20	7.9	0.47501	2.82254e-07	4.56477e-09	2.82181e-07	2.82254e-07	4.56477e-09	5.48102e-12	4.24916e-15	3.82295e-09	1.02871e-07	9.73898e-08	6.57299e-11	1.81035e-10	2.37743e-13	1.70886e-08	8.71587e-12	4.24915e-15	3.82294e-09	1.63585e-07	9.73895e-08	1.04523e-10	1.81035e-10	8.90009e-13	8.26023e-05	0.00017798
Sum EC20	7.9	0.47501	2.88967e-07	4.67336e-09	2.88894e-07	2.88967e-07	4.67336e-09	5.6114e-12	4.35024e-15	3.91388e-09	1.05318e-07	9.97064e-08	6.72876e-11	1.85325e-10	2.43355e-13	1.74951e-08	8.92321e-12	4.35023e-15	3.91387e-09	1.67476e-07	9.97062e-08	1.07e-10	1.85325e-10	9.11019e-13	8.0972e-05	0.00017458
Sum EC70	7.7	0.28503	3.42888e-05	1.01048e-06	3.42755e-05	3.42888e-05	1.01048e-06	7.65545e-10	3.74466e-13	6.15006e-07	1.45301e-05	8.77724e-06	9.41482e-09	1.63611e-08	8.77193e-12	3.27344e-06	1.13689e-09	3.74465e-13	6.15004e-07	2.15782e-05	8.77721e-06	1.39816e-08	1.6361e-08	2.84165e-11	0.00012508	0.000264776
Sum EC70	7.7	0.28503	3.45459e-05	1.01806e-06	3.45324e-05	3.45459e-05	1.01806e-06	7.71284e-10	3.77273e-13	6.19616e-07	1.4639e-05	8.84302e-06	9.48556e-09	1.6484e-08	8.838e-12	3.29798e-06	1.14541e-09	3.77272e-13	6.19614e-07	2.174e-05	8.84299e-06	1.40867e-08	1.6484e-08	2.86306e-11	0.000125979	0.000266742
Sum EC70	7.8	0.47502	3.23085e-05	5.22689e-07	3.2302e-05	3.23085e-05	5.22689e-07	4.98523e-10	3.06992e-13	4.37694e-07	1.17779e-05	1.11491e-05	7.4967e-09	1.6401e-08	1.70411e-11	1.95673e-06	7.92749e-10	3.06991e-13	4.37693e-07	1.87292e-05	1.11491e-05	1.19212e-08	1.6401e-08	6.37948e-11	6.47619e-05	0.00013888
Sum EC70	7.8	0.47502	3.26857e-05	5.28792e-07	3.26791e-05	3.26857e-05	5.28792e-07	5.04344e-10	3.10577e-13	4.42804e-07	1.19154e-05	1.12793e-05	7.58393e-09	1.65918e-08	1.72387e-11	1.97958e-06	8.02006e-10	3.10576e-13	4.42803e-07	1.89479e-05	1.12793e-05	1.20599e-08	1.65918e-08	6.45346e-11	6.46307e-05	0.000138589
Sum EC70	7.9	0.6617	3.1474e-05	3.36618e-07	3.14699e-05	3.1474e-05	3.36618e-07	4.04184e-10	3.13344e-13	3.46057e-07	1.01386e-05	1.28281e-05	6.33169e-09	1.74389e-08	2.99159e-11	1.38042e-06	6.73201e-10	3.13344e-13	3.46057e-07	1.68866e-05	1.28281e-05	1.05459e-08	1.74389e-08	1.2268e-10	4.07861e-05	8.91186e-05
Sum EC70	7.9	0.6617	3.18018e-05	3.40125e-07	3.17977e-05	3.18018e-05	3.40125e-07	4.08395e-10	3.16609e-13	3.49662e-07	1.02442e-05	1.29617e-05	6.3973e-09	1.76196e-08	3.02242e-11	1.3948e-06	6.80215e-10	3.16608e-13	3.49661e-07	1.70625e-05	1.29617e-05	1.06552e-08	1.76196e-08	1.23945e-10	4.04395e-05	8.83402e-05
Sum EC20	8.1	0.84722	2.98107e-07	2.31147e-09	2.98074e-07	2.98107e-07	2.31147e-09	4.39875e-12	5.4047e-15	2.76641e-09	8.64272e-08	1.35756e-07	5.27937e-11	2.30453e-10	7.60811e-13	1.01233e-08	7.58828e-12	5.4047e-15	2.76641e-09	1.49095e-07	1.35756e-07	9.10743e-11	2.30453e-10	3.33204e-12	3.42022e-05	7.6372e-05
Sum EC20	8.1	0.84722	2.9505e-07	2.28776e-09	2.95017e-07	2.9505e-07	2.28776e-09	4.35365e-12	5.34928e-15	2.73804e-09	8.55409e-08	1.34364e-07	5.22524e-11	2.2809e-10	7.53012e-13	1.00195e-08	7.51047e-12	5.34927e-15	2.73804e-09	1.47566e-07	1.34364e-07	9.01405e-11	2.2809e-10	3.29788e-12	3.41907e-05	7.63547e-05
Sum EC20	8.1	0.84722	2.99053e-07	2.31881e-09	2.99021e-07	2.99053e-07	2.31881e-09	4.41272e-12	5.42187e-15	2.7752e-09	8.67017e-08	1.36187e-07	5.29611e-11	2.31183e-10	7.63218e-13	1.01554e-08	7.61238e-12	5.42186e-15	2.77519e-09	1.49569e-07	1.36187e-07	9.1363e-11	2.31183e-10	3.34258e-12	3.41125e-05	7.62383e-05
Sum EC20	8.2	1.0319	2.84273e-07	1.69269e-09	2.8425e-07	2.84273e-07	1.69269e-09	4.05526e-12	6.27279e-15	2.28453e-09	7.52081e-08	1.40378e-07	4.4823e-11	2.46321e-10	1.18693e-12	7.79978e-09	7.19561e-12	6.27278e-15	2.28452e-09	1.33448e-07	1.40378e-07	7.95335e-11	2.46321e-10	5.4693e-12	2.5337e-05	5.71347e-05
Sum EC20	8.2	1.0319	2.8352e-07	1.6882e-09	2.83496e-07	2.8352e-07	1.6882e-09	4.04451e-12	6.25617e-15	2.27847e-09	7.50088e-08	1.40006e-07	4.47042e-11	2.45668e-10	1.18378e-12	7.77911e-09	7.17654e-12	6.25616e-15	2.27847e-09	1.33095e-07	1.40006e-07	7.93226e-11	2.45667e-10	5.45478e-12	2.56794e-05	5.77427e-05
Sum EC20	8.2	1.0319	2.80741e-07	1.67166e-09	2.80718e-07	2.80741e-07	1.67166e-09	4.00488e-12	6.19486e-15	2.25614e-09	7.42737e-08	1.38634e-07	4.42672e-11	2.43267e-10	1.17224e-12	7.70287e-09	7.10621e-12	6.19485e-15	2.25614e-09	1.3179e-07	1.38634e-07	7.85472e-11	2.43266e-10	5.40161e-12	2.56036e-05	5.76503e-05
Sum EC70	8.1	1.03191	3.76411e-05	2.242e-07	3.76386e-05	3.76411e-05	2.242e-07	4.26655e-10	5.24227e-13	3.02557e-07	9.96078e-06	1.85908e-05	5.96177e-09	2.60241e-08	1.00027e-10	1.0331e-06	7.57054e-10	5.24226e-13	3.02557e-07	1.76743e-05	1.85908e-05	1.05785e-08	2.60241e-08	4.60917e-10	2.01988e-05	4.57556e-05
Sum EC70	8.1	1.03192	3.79995e-05	2.26335e-07	3.7997e-05	3.79995e-05	2.26335e-07	4.30719e-10	5.29219e-13	3.05438e-07	1.00556e-05	1.87678e-05	6.0183e-09	2.62708e-08	1.00971e-10	1.04294e-06	7.64263e-10	5.29219e-13	3.05438e-07	1.78426e-05	1.87678e-05	1.06788e-08	2.62708e-08	4.65268e-10	2.01031e-05	4.55329e-05
Sum EC70	8.1	1.03192	3.30223e-05	1.96687e-07	3.30202e-05	3.30223e-05	1.96687e-07	3.74298e-10	4.59896e-13	2.6543e-07	8.73851e-06	1.63097e-05	5.23047e-09	2.28318e-08	8.77618e-11	9.06323e-07	6.64152e-10	4.59896e-13	2.65429e-07	1.55055e-05	1.63097e-05	9.2809e-09	2.28318e-08	4.04402e-10	2.03165e-05	4.60261e-05
Sum EC70	8.1	1.03192	3.30473e-05	1.96836e-07	3.30452e-05	3.30473e-05	1.96836e-07	3.74582e-10	4.60244e-13	2.65631e-07	8.74512e-06	1.6322e-05	5.23444e-09	2.28492e-08	8.78288e-11	9.07009e-07	6.64654e-10	4.60244e-13	2.6563e-07	1.55173e-05	1.6322e-05	9.28796e-09	2.28492e-08	4.0471e-10	2.03563e-05	4.61099e-05
Cu high	7.9	0.65052	0	0	0	0	-	-	-	-	-	-	-	-	-	-	-	-	-	-	-	-	-	-	0	0
Cu high	7.9	0.65423	0	0	0	0	-	-	-	-	-	-	-	-	-	-	-	-	-	-	-	-	-	-	0	0
Cu low	7.9	0.66168	0	0	0	0	-	-	-	-	-	-	-	-	-	-	-	-	-	-	-	-	-	-	0	0
Cu low	7.9	0.66168	0	0	0	0	-	-	-	-	-	-	-	-	-	-	-	-	-	-	-	-	-	-	0	0
Cu high	8	0.65422	0	0	0	0	-	-	-	-	-	-	-	-	-	-	-	-	-	-	-	-	-	-	0	0
Cu high	7.9	0.65423	0	0	0	0	-	-	-	-	-	-	-	-	-	-	-	-	-	-	-	-	-	-	0	0
Cu low	7.9	0.65423	0	0	0	0	-	-	-	-	-	-	-	-	-	-	-	-	-	-	-	-	-	-	0	0
Cu low	7.9	0.65423	0	0	0	0	-	-	-	-	-	-	-	-	-	-	-	-	-	-	-	-	-	-	0	0
Cu low	8	0.66168	0	0	0	0	-	-	-	-	-	-	-	-	-	-	-	-	-	-	-	-	-	-	0	0
Cu low	8	0.66168	0	0	0	0	-	-	-	-	-	-	-	-	-	-	-	-	-	-	-	-	-	-	0	0
Cu high	7.9	0.65423	0	0	0	0	-	-	-	-	-	-	-	-	-	-	-	-	-	-	-	-	-	-	0	0
Cu high	7.9	0.65423	0	0	0	0	-	-	-	-	-	-	-	-	-	-	-	-	-	-	-	-	-	-	0	0
Cu high	7.9	0.66168	0	0	0	0	-	-	-	-	-	-	-	-	-	-	-	-	-	-	-	-	-	-	0	0
Cu high	7.9	0.66168	0	0	0	0	-	-	-	-	-	-	-	-	-	-	-	-	-	-	-	-	-	-	0	0
Cu high	7.9	0.65423	0	0	0	0	-	-	-	-	-	-	-	-	-	-	-	-	-	-	-	-	-	-	0	0
Cu high	7.9	0.65423	0	0	0	0	-	-	-	-	-	-	-	-	-	-	-	-	-	-	-	-	-	-	0	0
Cu high	7.9	0.65423	0	0	0	0	-	-	-	-	-	-	-	-	-	-	-	-	-	-	-	-	-	-	0	0
Cu high	7.9	0.65423	0	0	0	0	-	-	-	-	-	-	-	-	-	-	-	-	-	-	-	-	-	-	0	0
Cu high	8	0.66168	0	0	0	0	-	-	-	-	-	-	-	-	-	-	-	-	-	-	-	-	-	-	0	0
Cu high	8	0.66168	0	0	0	0	-	-	-	-	-	-	-	-	-	-	-	-	-	-	-	-	-	-	0	0
Control	7.7	0.27931	0	0	0	0	-	-	-	-	-	-	-	-	-	-	-	-	-	-	-	-	-	-	0	0
Control	7.7	0.28315	0	0	0	0	-	-	-	-	-	-	-	-	-	-	-	-	-	-	-	-	-	-	0	0
Control	7.7	0.28499	0	0	0	0	-	-	-	-	-	-	-	-	-	-	-	-	-	-	-	-	-	-	0	0
Control	7.9	0.34166	0	0	0	0	-	-	-	-	-	-	-	-	-	-	-	-	-	-	-	-	-	-	0	0
Control	7.9	0.34166	0	0	0	0	-	-	-	-	-	-	-	-	-	-	-	-	-	-	-	-	-	-	0	0
Control	7.9	0.46939	0	0	0	0	-	-	-	-	-	-	-	-	-	-	-	-	-	-	-	-	-	-	0	0
Control	7.9	0.47692	0	0	0	0	-	-	-	-	-	-	-	-	-	-	-	-	-	-	-	-	-	-	0	0
Control	7.9	0.4731	0	0	0	0	-	-	-	-	-	-	-	-	-	-	-	-	-	-	-	-	-	-	0	0
Control	7.9	0.47499	0	0	0	0	-	-	-	-	-	-	-	-	-	-	-	-	-	-	-	-	-	-	0	0
Control	7.9	0.47499	0	0	0	0	-	-	-	-	-	-	-	-	-	-	-	-	-	-	-	-	-	-	0	0
Control	7.9	0.66168	0	0	0	0	-	-	-	-	-	-	-	-	-	-	-	-	-	-	-	-	-	-	0	0
Control	7.9	0.66168	0	0	0	0	-	-	-	-	-	-	-	-	-	-	-	-	-	-	-	-	-	-	0	0
Control	8.1	0.8472	0	0	0	0	-	-	-	-	-	-	-	-	-	-	-	-	-	-	-	-	-	-	0	0
Control	8.1	0.85095	0	0	0	0	-	-	-	-	-	-	-	-	-	-	-	-	-	-	-	-	-	-	0	0
Control	8.1	0.85274	0	0	0	0	-	-	-	-	-	-	-	-	-	-	-	-	-	-	-	-	-	-	0	0
Control	8.2	1.0356	0	0	0	0	-	-	-	-	-	-	-	-	-	-	-	-	-	-	-	-	-	-	0	0
Control	8.2	1.03926	0	0	0	0	-	-	-	-	-	-	-	-	-	-	-	-	-	-	-	-	-	-	0	0
Control	8.2	1.03739	0	0	0	0	-	-	-	-	-	-	-	-	-	-	-	-	-	-	-	-	-	-	0	0
Control	8.1	0.65422	0	0	0	0	-	-	-	-	-	-	-	-	-	-	-	-	-	-	-	-	-	-	0	0
Control	8.1	0.65422	0	0	0	0	-	-	-	-	-	-	-	-	-	-	-	-	-	-	-	-	-	-	0	0
Control	8.1	0.65422	0	0	0	0	-	-	-	-	-	-	-	-	-	-	-	-	-	-	-	-	-	-	0	0
Control	8.1	0.65422	0	0	0	0	-	-	-	-	-	-	-	-	-	-	-	-	-	-	-	-	-	-	0	0
Control	7.9	0.65793	0	0	0	0	-	-	-	-	-	-	-	-	-	-	-	-	-	-	-	-	-	-	0	0
Control	8	0.65792	0	0	0	0	-	-	-	-	-	-	-	-	-	-	-	-	-	-	-	-	-	-	0	0
Control	8	0.65422	0	0	0	0	-	-	-	-	-	-	-	-	-	-	-	-	-	-	-	-	-	-	0	0
Control	8	0.65422	0	0	0	0	-	-	-	-	-	-	-	-	-	-	-	-	-	-	-	-	-	-	0	0
Control	8	0.64864	0	0	0	0	-	-	-	-	-	-	-	-	-	-	-	-	-	-	-	-	-	-	0	0
Control	7.9	0.65612	0	0	0	0	-	-	-	-	-	-	-	-	-	-	-	-	-	-	-	-	-	-	0	0
Control	8	0.66168	0	0	0	0	-	-	-	-	-	-	-	-	-	-	-	-	-	-	-	-	-	-	0	0
Control	8	0.66168	0	0	0	0	-	-	-	-	-	-	-	-	-	-	-	-	-	-	-	-	-	-	0	0

## Sheet: Lead
Treatment	pH	Ionic strength (M)	Total (M): Pb	Free ion activity (M): Pb	Total true solution concentration (M): Pb	Total aqueous concentration (M): Pb	Activity (M): Pb[2+]	Activity (M): PbHCO3[+]	Activity (M): PbOH[+]	Activity (M): Pb(OH)2[0]	Activity (M): Pb(OH)3[-]	Activity (M): PbSO4[0]	Activity (M): PbCl[+]	Activity (M): PbCl2[0]	Activity (M): PbCO3[0]	Activity (M): Pb(CO3)2[2-]	Aqueous concentration (M): Pb[2+]	Aqueous concentration (M): PbHCO3[+]	Aqueous concentration (M): PbOH[+]	Aqueous concentration (M): Pb(OH)2[0]	Aqueous concentration (M): Pb(OH)3[-]	Aqueous concentration (M): PbSO4[0]	Aqueous concentration (M): PbCl[+]	Aqueous concentration (M): PbCl2[0]	Aqueous concentration (M): PbCO3[0]	Aqueous concentration (M): Pb(CO3)2[2-]	Fraction bound to colloidal HA : Pb	Fraction bound to colloidal FA : Pb
Cu high	7.7	0.28499	0	0	0	0	-	-	-	-	-	-	-	-	-	-	-	-	-	-	-	-	-	-	-	-	0	0
Cu high	7.7	0.28499	0	0	0	0	-	-	-	-	-	-	-	-	-	-	-	-	-	-	-	-	-	-	-	-	0	0
Cu high	7.7	0.47499	0	0	0	0	-	-	-	-	-	-	-	-	-	-	-	-	-	-	-	-	-	-	-	-	0	0
Cu high	7.8	0.47499	0	0	0	0	-	-	-	-	-	-	-	-	-	-	-	-	-	-	-	-	-	-	-	-	0	0
Cu high	7.9	0.66168	0	0	0	0	-	-	-	-	-	-	-	-	-	-	-	-	-	-	-	-	-	-	-	-	0	0
Cu high	7.9	0.66168	0	0	0	0	-	-	-	-	-	-	-	-	-	-	-	-	-	-	-	-	-	-	-	-	0	0
Cu high	8.1	1.0319	0	0	0	0	-	-	-	-	-	-	-	-	-	-	-	-	-	-	-	-	-	-	-	-	0	0
Cu high	8.1	1.0319	0	0	0	0	-	-	-	-	-	-	-	-	-	-	-	-	-	-	-	-	-	-	-	-	0	0
Cu high	8.1	1.0319	0	0	0	0	-	-	-	-	-	-	-	-	-	-	-	-	-	-	-	-	-	-	-	-	0	0
Cu high	8.1	1.0319	0	0	0	0	-	-	-	-	-	-	-	-	-	-	-	-	-	-	-	-	-	-	-	-	0	0
Cd low	7.7	0.28692	0	0	0	0	-	-	-	-	-	-	-	-	-	-	-	-	-	-	-	-	-	-	-	-	0	0
Cd low	7.7	0.28692	0	0	0	0	-	-	-	-	-	-	-	-	-	-	-	-	-	-	-	-	-	-	-	-	0	0
Cd low	7.7	0.28692	0	0	0	0	-	-	-	-	-	-	-	-	-	-	-	-	-	-	-	-	-	-	-	-	0	0
Cd low	7.9	0.47499	0	0	0	0	-	-	-	-	-	-	-	-	-	-	-	-	-	-	-	-	-	-	-	-	0	0
Cd low	8	0.47499	0	0	0	0	-	-	-	-	-	-	-	-	-	-	-	-	-	-	-	-	-	-	-	-	0	0
Cd low	8	0.47499	0	0	0	0	-	-	-	-	-	-	-	-	-	-	-	-	-	-	-	-	-	-	-	-	0	0
Cd high	7.7	0.28499	0	0	0	0	-	-	-	-	-	-	-	-	-	-	-	-	-	-	-	-	-	-	-	-	0	0
Cd high	7.7	0.28499	0	0	0	0	-	-	-	-	-	-	-	-	-	-	-	-	-	-	-	-	-	-	-	-	0	0
Cd high	7.8	0.47499	0	0	0	0	-	-	-	-	-	-	-	-	-	-	-	-	-	-	-	-	-	-	-	-	0	0
Cd high	7.8	0.47499	0	0	0	0	-	-	-	-	-	-	-	-	-	-	-	-	-	-	-	-	-	-	-	-	0	0
Cd high	7.9	0.66168	0	0	0	0	-	-	-	-	-	-	-	-	-	-	-	-	-	-	-	-	-	-	-	-	0	0
Cd high	7.9	0.66168	0	0	0	0	-	-	-	-	-	-	-	-	-	-	-	-	-	-	-	-	-	-	-	-	0	0
Cd low	8.1	0.8472	0	0	0	0	-	-	-	-	-	-	-	-	-	-	-	-	-	-	-	-	-	-	-	-	0	0
Cd low	8.1	0.8472	0	0	0	0	-	-	-	-	-	-	-	-	-	-	-	-	-	-	-	-	-	-	-	-	0	0
Cd low	8.1	0.8472	0	0	0	0	-	-	-	-	-	-	-	-	-	-	-	-	-	-	-	-	-	-	-	-	0	0
Cd low	8.2	1.03188	0	0	0	0	-	-	-	-	-	-	-	-	-	-	-	-	-	-	-	-	-	-	-	-	0	0
Cd low	8.2	1.03188	0	0	0	0	-	-	-	-	-	-	-	-	-	-	-	-	-	-	-	-	-	-	-	-	0	0
Cd low	8.2	1.03188	0	0	0	0	-	-	-	-	-	-	-	-	-	-	-	-	-	-	-	-	-	-	-	-	0	0
Cd high	8.1	1.03189	0	0	0	0	-	-	-	-	-	-	-	-	-	-	-	-	-	-	-	-	-	-	-	-	0	0
Cd high	8.1	1.03189	0	0	0	0	-	-	-	-	-	-	-	-	-	-	-	-	-	-	-	-	-	-	-	-	0	0
Cd high	8.1	1.03189	0	0	0	0	-	-	-	-	-	-	-	-	-	-	-	-	-	-	-	-	-	-	-	-	0	0
Cd high	8.2	1.03187	0	0	0	0	-	-	-	-	-	-	-	-	-	-	-	-	-	-	-	-	-	-	-	-	0	0
Pb high	7.7	0.28499	1.77237e-06	6.82207e-08	1.58198e-06	1.77237e-06	6.82207e-08	1.60393e-08	1.2116e-08	4.29339e-11	4.48996e-15	1.0867e-07	2.36675e-07	1.05409e-07	7.50212e-07	1.03861e-09	2.20991e-07	2.3819e-08	1.79927e-08	4.29338e-11	6.66778e-15	1.08669e-07	3.51472e-07	1.05409e-07	7.5021e-07	3.36443e-09	0.03255	0.07488
Pb high	7.7	0.28499	1.72499e-06	6.63292e-08	1.53813e-06	1.72499e-06	6.63292e-08	1.55949e-08	1.178e-08	4.17435e-11	4.36547e-15	1.05657e-07	2.30113e-07	1.02487e-07	7.2943e-07	1.00986e-09	2.14864e-07	2.31591e-08	1.74938e-08	4.17433e-11	6.4829e-15	1.05656e-07	3.41727e-07	1.02486e-07	7.29427e-07	3.27131e-09	0.03283	0.0755
Pb high	7.8	0.47499	1.52845e-06	3.49845e-08	1.4275e-06	1.52845e-06	3.49845e-08	1.26465e-08	7.822e-09	3.48947e-11	4.59412e-15	7.66608e-08	1.90179e-07	1.32722e-07	7.44679e-07	1.99555e-09	1.30966e-07	2.01102e-08	1.24384e-08	3.48946e-11	7.30549e-15	7.66606e-08	3.0242e-07	1.32721e-07	7.44678e-07	7.47041e-09	0.0198	0.04625
Pb high	7.8	0.47499	1.52189e-06	3.48316e-08	1.42127e-06	1.52189e-06	3.48316e-08	1.25912e-08	7.78782e-09	3.47423e-11	4.57404e-15	7.63259e-08	1.89348e-07	1.32142e-07	7.41428e-07	1.98684e-09	1.30393e-07	2.00224e-08	1.23841e-08	3.47422e-11	7.27357e-15	7.63257e-08	3.01099e-07	1.32141e-07	7.41426e-07	7.43781e-09	0.01982	0.0463
Pb low	7.9	0.66168	1.26522e-06	1.92429e-08	1.20638e-06	1.26522e-06	1.92429e-08	9.11796e-09	5.41642e-09	3.04197e-11	5.04193e-15	5.17633e-08	1.39816e-07	1.30417e-07	6.75924e-07	2.989e-09	7.89113e-08	1.51866e-08	9.02144e-09	3.04196e-11	8.39769e-15	5.17632e-08	2.32873e-07	1.30416e-07	6.75923e-07	1.22573e-08	0.01388	0.03262
Pb low	7.9	0.66168	1.28042e-06	1.94766e-08	1.22104e-06	1.28042e-06	1.94766e-08	9.22868e-09	5.48221e-09	3.07892e-11	5.10317e-15	5.23921e-08	1.41514e-07	1.32001e-07	6.84132e-07	3.02528e-09	7.98699e-08	1.5371e-08	9.13102e-09	3.07891e-11	8.4997e-15	5.2392e-08	2.35702e-07	1.32001e-07	6.84131e-07	1.24061e-08	0.01384	0.03254
Pb low	8.2	1.03188	9.62309e-07	6.31924e-09	9.37283e-07	9.62309e-07	6.31924e-09	4.21229e-09	3.54901e-09	3.97694e-11	1.3152e-14	2.23143e-08	6.77273e-08	9.31865e-08	6.23043e-07	7.73342e-09	2.91185e-08	7.47422e-09	6.2973e-09	3.97693e-11	2.33367e-14	2.23143e-08	1.20174e-07	9.31864e-08	6.23043e-07	3.56349e-08	0.00758053	0.01843
Pb low	8.2	1.03188	1.10709e-06	7.27566e-09	1.07911e-06	1.10709e-06	7.27566e-09	4.84966e-09	4.08615e-09	4.57885e-11	1.51425e-14	2.56916e-08	7.79778e-08	1.0729e-07	7.17317e-07	8.90329e-09	3.35256e-08	8.60516e-09	7.2504e-09	4.57885e-11	2.68687e-14	2.56916e-08	1.38363e-07	1.0729e-07	7.17316e-07	4.10255e-08	0.00735046	0.01792
Pb low	8.2	1.03188	1.05738e-06	6.94721e-09	1.03041e-06	1.05738e-06	6.94721e-09	4.63078e-09	3.90169e-09	4.37214e-11	1.44589e-14	2.45318e-08	7.44576e-08	1.02447e-07	6.84943e-07	8.50156e-09	3.20121e-08	8.21679e-09	6.92309e-09	4.37214e-11	2.56557e-14	2.45317e-08	1.32116e-07	1.02447e-07	6.84942e-07	3.91744e-08	0.00742561	0.01808
Pb low	8.1	1.0319	1.13894e-06	8.79066e-09	1.10898e-06	1.13894e-06	8.79066e-09	5.88665e-09	3.9216e-09	3.49065e-11	9.16955e-15	3.10396e-08	9.42148e-08	1.29631e-07	6.91621e-07	6.85038e-09	4.05068e-08	1.04452e-08	6.95845e-09	3.49064e-11	1.62703e-14	3.10395e-08	1.67174e-07	1.2963e-07	6.9162e-07	3.15661e-08	0.00773273	0.01858
Zn low	7.7	0.28693	0	0	0	0	-	-	-	-	-	-	-	-	-	-	-	-	-	-	-	-	-	-	-	-	0	0
Zn low	7.7	0.28693	0	0	0	0	-	-	-	-	-	-	-	-	-	-	-	-	-	-	-	-	-	-	-	-	0	0
Zn low	7.7	0.28693	0	0	0	0	-	-	-	-	-	-	-	-	-	-	-	-	-	-	-	-	-	-	-	-	0	0
Zn low	7.9	0.475	0	0	0	0	-	-	-	-	-	-	-	-	-	-	-	-	-	-	-	-	-	-	-	-	0	0
Zn low	7.9	0.475	0	0	0	0	-	-	-	-	-	-	-	-	-	-	-	-	-	-	-	-	-	-	-	-	0	0
Zn low	7.9	0.475	0	0	0	0	-	-	-	-	-	-	-	-	-	-	-	-	-	-	-	-	-	-	-	-	0	0
Zn high	7.7	0.28501	0	0	0	0	-	-	-	-	-	-	-	-	-	-	-	-	-	-	-	-	-	-	-	-	0	0
Zn high	7.7	0.28694	0	0	0	0	-	-	-	-	-	-	-	-	-	-	-	-	-	-	-	-	-	-	-	-	0	0
Zn high	7.8	0.47501	0	0	0	0	-	-	-	-	-	-	-	-	-	-	-	-	-	-	-	-	-	-	-	-	0	0
Zn high	7.8	0.47501	0	0	0	0	-	-	-	-	-	-	-	-	-	-	-	-	-	-	-	-	-	-	-	-	0	0
Zn high	7.9	0.6617	0	0	0	0	-	-	-	-	-	-	-	-	-	-	-	-	-	-	-	-	-	-	-	-	0	0
Zn high	7.9	0.6617	0	0	0	0	-	-	-	-	-	-	-	-	-	-	-	-	-	-	-	-	-	-	-	-	0	0
Zn low	8.1	0.84721	0	0	0	0	-	-	-	-	-	-	-	-	-	-	-	-	-	-	-	-	-	-	-	-	0	0
Zn low	8.1	0.84721	0	0	0	0	-	-	-	-	-	-	-	-	-	-	-	-	-	-	-	-	-	-	-	-	0	0
Zn low	8.1	0.84721	0	0	0	0	-	-	-	-	-	-	-	-	-	-	-	-	-	-	-	-	-	-	-	-	0	0
Zn low	8.2	1.03189	0	0	0	0	-	-	-	-	-	-	-	-	-	-	-	-	-	-	-	-	-	-	-	-	0	0
Zn low	8.2	1.03189	0	0	0	0	-	-	-	-	-	-	-	-	-	-	-	-	-	-	-	-	-	-	-	-	0	0
Zn low	8.2	1.03189	0	0	0	0	-	-	-	-	-	-	-	-	-	-	-	-	-	-	-	-	-	-	-	-	0	0
Zn high	8.1	1.03192	0	0	0	0	-	-	-	-	-	-	-	-	-	-	-	-	-	-	-	-	-	-	-	-	0	0
Zn high	8.1	1.03192	0	0	0	0	-	-	-	-	-	-	-	-	-	-	-	-	-	-	-	-	-	-	-	-	0	0
Zn high	8.1	1.03192	0	0	0	0	-	-	-	-	-	-	-	-	-	-	-	-	-	-	-	-	-	-	-	-	0	0
Zn high	8.1	1.03192	0	0	0	0	-	-	-	-	-	-	-	-	-	-	-	-	-	-	-	-	-	-	-	-	0	0
Ni high	7.8	0.28501	0	0	0	0	-	-	-	-	-	-	-	-	-	-	-	-	-	-	-	-	-	-	-	-	0	0
Ni high	7.7	0.28501	0	0	0	0	-	-	-	-	-	-	-	-	-	-	-	-	-	-	-	-	-	-	-	-	0	0
Ni high	7.8	0.47501	0	0	0	0	-	-	-	-	-	-	-	-	-	-	-	-	-	-	-	-	-	-	-	-	0	0
Ni high	7.8	0.47501	0	0	0	0	-	-	-	-	-	-	-	-	-	-	-	-	-	-	-	-	-	-	-	-	0	0
Ni high	7.9	0.6617	0	0	0	0	-	-	-	-	-	-	-	-	-	-	-	-	-	-	-	-	-	-	-	-	0	0
Ni high	7.9	0.6617	0	0	0	0	-	-	-	-	-	-	-	-	-	-	-	-	-	-	-	-	-	-	-	-	0	0
Ni high	8.1	0.84722	0	0	0	0	-	-	-	-	-	-	-	-	-	-	-	-	-	-	-	-	-	-	-	-	0	0
Ni high	8.1	0.84722	0	0	0	0	-	-	-	-	-	-	-	-	-	-	-	-	-	-	-	-	-	-	-	-	0	0
Ni high	8.1	0.84722	0	0	0	0	-	-	-	-	-	-	-	-	-	-	-	-	-	-	-	-	-	-	-	-	0	0
Ni high	8.2	1.0319	0	0	0	0	-	-	-	-	-	-	-	-	-	-	-	-	-	-	-	-	-	-	-	-	0	0
Ni high	8.2	1.0319	0	0	0	0	-	-	-	-	-	-	-	-	-	-	-	-	-	-	-	-	-	-	-	-	0	0
Ni high	8.2	1.0319	0	0	0	0	-	-	-	-	-	-	-	-	-	-	-	-	-	-	-	-	-	-	-	-	0	0
Ni high	8.2	1.0319	0	0	0	0	-	-	-	-	-	-	-	-	-	-	-	-	-	-	-	-	-	-	-	-	0	0
Sum EC10	7.7	0.28694	1.36536e-06	5.31249e-08	1.23755e-06	1.36536e-06	5.31249e-08	1.25359e-08	9.43497e-09	3.34336e-11	3.49643e-15	8.48793e-08	1.8537e-07	8.30364e-08	5.86346e-07	8.14722e-10	1.72427e-07	1.86327e-08	1.40237e-08	3.34335e-11	5.19693e-15	8.4879e-08	2.75525e-07	8.30362e-08	5.86344e-07	2.64433e-09	0.02783	0.06578
Sum EC10	7.7	0.28694	1.48323e-06	5.78622e-08	1.34779e-06	1.48323e-06	5.78622e-08	1.36515e-08	1.02763e-08	3.64149e-11	3.80821e-15	9.24472e-08	2.01899e-07	9.04407e-08	6.38527e-07	8.87082e-10	1.87802e-07	2.02909e-08	1.52742e-08	3.64148e-11	5.66035e-15	9.24469e-08	3.00093e-07	9.04404e-08	6.38525e-07	2.87919e-09	0.02716	0.06415
Sum EC10	7.7	0.28694	1.46753e-06	5.72376e-08	1.33325e-06	1.46753e-06	5.72376e-08	1.35043e-08	1.01654e-08	3.60218e-11	3.76711e-15	9.14494e-08	1.9972e-07	8.94646e-08	6.31643e-07	8.7753e-10	1.85775e-07	2.00722e-08	1.51094e-08	3.60217e-11	5.59926e-15	9.14491e-08	2.96854e-07	8.94643e-08	6.31641e-07	2.84818e-09	0.02721	0.06428
Sum EC10	7.9	0.47501	1.29274e-06	2.63646e-08	1.22797e-06	1.29274e-06	2.63646e-08	9.5454e-09	7.42101e-09	4.16779e-11	6.90792e-15	5.77683e-08	1.43319e-07	1.00018e-07	7.07611e-07	2.39093e-09	9.86975e-08	1.5179e-08	1.18008e-08	4.16778e-11	1.09849e-14	5.77682e-08	2.27905e-07	1.00018e-07	7.07609e-07	8.95061e-09	0.01438	0.03572
Sum EC10	7.9	0.47501	1.24703e-06	2.54293e-08	1.18445e-06	1.24703e-06	2.54293e-08	9.20728e-09	7.15775e-09	4.01993e-11	6.66286e-15	5.57191e-08	1.38235e-07	9.647e-08	6.82545e-07	2.30637e-09	9.51962e-08	1.46413e-08	1.13822e-08	4.01992e-11	1.05952e-14	5.57189e-08	2.1982e-07	9.64697e-08	6.82544e-07	8.63403e-09	0.01439	0.0358
Sum EC10	7.9	0.47501	1.19954e-06	2.44524e-08	1.13896e-06	1.19954e-06	2.44524e-08	8.85376e-09	6.88278e-09	3.8655e-11	6.40691e-15	5.35787e-08	1.32925e-07	9.27641e-08	6.56338e-07	2.21786e-09	9.15392e-08	1.40792e-08	1.09449e-08	3.8655e-11	1.01882e-14	5.35785e-08	2.11375e-07	9.27638e-08	6.56337e-07	8.30268e-09	0.01448	0.03603
Sum EC50	7.7	0.28501	1.46084e-06	5.78416e-08	1.33948e-06	1.46084e-06	5.78416e-08	1.35633e-08	1.02727e-08	3.6402e-11	3.80686e-15	9.21137e-08	2.00641e-07	8.93492e-08	6.34401e-07	8.75966e-10	1.87374e-07	2.01422e-08	1.52555e-08	3.64018e-11	5.65341e-15	9.21134e-08	2.97964e-07	8.93489e-08	6.34399e-07	2.83764e-09	0.02472	0.05836
Sum EC50	7.7	0.28501	1.45601e-06	5.76802e-08	1.33569e-06	1.45601e-06	5.76802e-08	1.35246e-08	1.0244e-08	3.63003e-11	3.79623e-15	9.1856e-08	2.0008e-07	8.90992e-08	6.32592e-07	8.73415e-10	1.86852e-07	2.00848e-08	1.52129e-08	3.63002e-11	5.63763e-15	9.18557e-08	2.97131e-07	8.90989e-08	6.3259e-07	2.82938e-09	0.02459	0.05805
Sum EC50	7.8	0.47501	1.32136e-06	3.08728e-08	1.25825e-06	1.32136e-06	3.08728e-08	1.1137e-08	6.90269e-09	3.07936e-11	4.05418e-15	6.76409e-08	1.67813e-07	1.17103e-07	6.55795e-07	1.75372e-09	1.15575e-07	1.771e-08	1.09766e-08	3.07935e-11	6.44691e-15	6.76407e-08	2.66855e-07	1.17103e-07	6.55794e-07	6.56518e-09	0.01387	0.03389
Sum EC50	7.8	0.47501	1.29193e-06	3.01832e-08	1.23015e-06	1.29193e-06	3.01832e-08	1.08883e-08	6.74851e-09	3.01058e-11	3.96362e-15	6.613e-08	1.64065e-07	1.14487e-07	6.4115e-07	1.71456e-09	1.12993e-07	1.73145e-08	1.07314e-08	3.01057e-11	6.30292e-15	6.61299e-08	2.60895e-07	1.14487e-07	6.41149e-07	6.41859e-09	0.01389	0.03393
Sum EC50	7.9	0.6617	1.2048e-06	1.863e-08	1.16673e-06	1.2048e-06	1.863e-08	8.81226e-09	5.2439e-09	2.94508e-11	4.88134e-15	5.01096e-08	1.35354e-07	1.26247e-07	6.53262e-07	2.88378e-09	7.63983e-08	1.46775e-08	8.73412e-09	2.94507e-11	8.13024e-15	5.01095e-08	2.25443e-07	1.26247e-07	6.53261e-07	1.18259e-08	0.00893836	0.02266
Sum EC50	7.9	0.6617	1.23202e-06	1.90607e-08	1.19366e-06	1.23202e-06	1.90607e-08	9.01547e-09	5.36513e-09	3.01316e-11	4.99419e-15	5.12679e-08	1.38483e-07	1.29166e-07	6.68326e-07	2.95011e-09	7.81645e-08	1.5016e-08	8.93604e-09	3.01316e-11	8.3182e-15	5.12678e-08	2.30655e-07	1.29165e-07	6.68325e-07	1.20979e-08	0.00881369	0.02232
Sum EC10	8.1	0.84722	1.18128e-06	1.09724e-08	1.15484e-06	1.18128e-06	1.09724e-08	6.30035e-09	4.89491e-09	4.357e-11	1.14454e-14	3.4357e-08	9.89634e-08	1.14587e-07	7.40227e-07	6.28675e-09	4.80547e-08	1.08687e-08	8.44419e-09	4.35699e-11	1.97443e-14	3.4357e-08	1.70721e-07	1.14587e-07	7.40225e-07	2.75334e-08	0.00614575	0.01624
Sum EC10	8.1	0.84722	1.21355e-06	1.12735e-08	1.1865e-06	1.21355e-06	1.12735e-08	6.47305e-09	5.02921e-09	4.47653e-11	1.17594e-14	3.52996e-08	1.01679e-07	1.17731e-07	7.60517e-07	6.45892e-09	4.93731e-08	1.11666e-08	8.67587e-09	4.47653e-11	2.0286e-14	3.52996e-08	1.75405e-07	1.17731e-07	7.60516e-07	2.82874e-08	0.00611493	0.01617
Sum EC10	8.1	0.84722	1.21526e-06	1.12899e-08	1.18824e-06	1.21526e-06	1.12899e-08	6.48251e-09	5.03656e-09	4.48307e-11	1.17766e-14	3.53512e-08	1.01827e-07	1.17903e-07	7.61628e-07	6.46837e-09	4.94452e-08	1.1183e-08	8.68855e-09	4.48307e-11	2.03157e-14	3.53512e-08	1.75662e-07	1.17903e-07	7.61627e-07	2.83287e-08	0.00609875	0.01614
Sum EC10	8.2	1.0319	1.2381e-06	8.2171e-09	1.21749e-06	1.2381e-06	8.2171e-09	5.46967e-09	4.61488e-09	5.17134e-11	1.71019e-14	2.90148e-08	8.80674e-08	1.21172e-07	8.09023e-07	1.00278e-08	3.78637e-08	9.70531e-09	8.18859e-09	5.17133e-11	3.03454e-14	2.90147e-08	1.56266e-07	1.21172e-07	8.09022e-07	4.62071e-08	0.00450448	0.01214
Sum EC10	8.2	1.0319	1.19829e-06	7.95179e-09	1.17823e-06	1.19829e-06	7.95179e-09	5.29336e-09	4.46588e-09	5.00437e-11	1.65497e-14	2.8078e-08	8.5224e-08	1.1726e-07	7.82945e-07	9.70504e-09	3.66412e-08	9.39246e-09	7.9242e-09	5.00436e-11	2.93657e-14	2.8078e-08	1.5122e-07	1.1726e-07	7.82944e-07	4.472e-08	0.00453429	0.01221
Sum EC10	8.2	1.0319	1.20943e-06	8.02734e-09	1.1894e-06	1.20943e-06	8.02734e-09	5.34349e-09	4.50831e-09	5.05191e-11	1.6707e-14	2.83448e-08	8.60336e-08	1.18374e-07	7.90361e-07	9.79669e-09	3.69893e-08	9.48143e-09	7.99948e-09	5.05191e-11	2.96446e-14	2.83447e-08	1.52657e-07	1.18374e-07	7.9036e-07	4.51424e-08	0.0044752	0.01209
Sum EC50	8.1	1.03191	1.13483e-06	8.85978e-09	1.11655e-06	1.13483e-06	8.85978e-09	5.9243e-09	3.95244e-09	3.51809e-11	9.24164e-15	3.12816e-08	9.49511e-08	1.30638e-07	6.96045e-07	6.88417e-09	4.08253e-08	1.0512e-08	7.01316e-09	3.51809e-11	1.63983e-14	3.12816e-08	1.6848e-07	1.30637e-07	6.96044e-07	3.17218e-08	0.00435881	0.01175
Sum EC50	8.1	1.03191	1.16948e-06	9.13172e-09	1.15079e-06	1.16948e-06	9.13172e-09	6.1059e-09	4.07375e-09	3.62608e-11	9.52531e-15	3.22418e-08	9.78655e-08	1.34647e-07	7.17381e-07	7.09491e-09	4.20784e-08	1.08342e-08	7.22843e-09	3.62607e-11	1.69016e-14	3.22417e-08	1.73652e-07	1.34647e-07	7.1738e-07	3.26929e-08	0.00432324	0.01165
Sum EC50	8.1	1.03191	1.16554e-06	9.10107e-09	1.14691e-06	1.16554e-06	9.10107e-09	6.08524e-09	4.06008e-09	3.61391e-11	9.49334e-15	3.21335e-08	9.75367e-08	1.34194e-07	7.14954e-07	7.07072e-09	4.19372e-08	1.07976e-08	7.20417e-09	3.6139e-11	1.68449e-14	3.21335e-08	1.73068e-07	1.34194e-07	7.14953e-07	3.25814e-08	0.00432502	0.01166
Sum EC50	8.1	1.03191	1.174e-06	9.16654e-09	1.15516e-06	1.174e-06	9.16654e-09	6.12905e-09	4.08929e-09	3.6399e-11	9.56163e-15	3.23647e-08	9.82384e-08	1.3516e-07	7.201e-07	7.12165e-09	4.22388e-08	1.08753e-08	7.25599e-09	3.6399e-11	1.69661e-14	3.23646e-08	1.74313e-07	1.3516e-07	7.20099e-07	3.28161e-08	0.00434319	0.0117
Sum EC10 -Cu	7.7	0.28694	1.3902e-06	5.38404e-08	1.25421e-06	1.3902e-06	5.38404e-08	1.27045e-08	9.56203e-09	3.38838e-11	3.54352e-15	8.60221e-08	1.87866e-07	8.41546e-08	5.94235e-07	8.25674e-10	1.74749e-07	1.88834e-08	1.42126e-08	3.38837e-11	5.26692e-15	8.60218e-08	2.79235e-07	8.41543e-08	5.94233e-07	2.67987e-09	0.02918	0.06865
Sum EC10 -Cu	7.7	0.28694	1.4545e-06	5.63814e-08	1.31337e-06	1.4545e-06	5.63814e-08	1.33035e-08	1.00133e-08	3.5483e-11	3.71076e-15	9.0082e-08	1.96732e-07	8.81264e-08	6.22254e-07	8.64567e-10	1.82996e-07	1.97738e-08	1.48833e-08	3.54829e-11	5.5155e-15	9.00818e-08	2.92414e-07	8.81261e-08	6.22252e-07	2.80611e-09	0.02895	0.06808
Sum EC10 -Cu	7.7	0.28694	1.47634e-06	5.72386e-08	1.33334e-06	1.47634e-06	5.72386e-08	1.35057e-08	1.01656e-08	3.60224e-11	3.76717e-15	9.14516e-08	1.99723e-07	8.94662e-08	6.31711e-07	8.77703e-10	1.85778e-07	2.00743e-08	1.51096e-08	3.60223e-11	5.59935e-15	9.14513e-08	2.96859e-07	8.94659e-08	6.31709e-07	2.84874e-09	0.02891	0.06796
Sum EC10 -Cu	7.9	0.47501	1.26944e-06	2.57573e-08	1.19977e-06	1.26944e-06	2.57573e-08	9.3266e-09	7.25007e-09	4.07178e-11	6.7488e-15	5.64381e-08	1.40018e-07	9.77143e-08	6.91391e-07	2.3364e-09	9.6424e-08	1.48311e-08	1.1529e-08	4.07177e-11	1.07319e-14	5.64379e-08	2.22655e-07	9.77141e-08	6.91389e-07	8.74645e-09	0.01589	0.039
Sum EC10 -Cu	7.9	0.47501	1.26195e-06	2.56084e-08	1.19282e-06	1.26195e-06	2.56084e-08	9.27251e-09	7.20815e-09	4.04824e-11	6.70978e-15	5.61117e-08	1.39208e-07	9.71493e-08	6.8738e-07	2.3228e-09	9.58665e-08	1.4745e-08	1.14623e-08	4.04823e-11	1.06698e-14	5.61115e-08	2.21368e-07	9.71491e-08	6.87379e-07	8.69556e-09	0.01585	0.03893
Sum EC10 -Cu	7.9	0.47501	1.28267e-06	2.60328e-08	1.21259e-06	1.28267e-06	2.60328e-08	9.42613e-09	7.32762e-09	4.11533e-11	6.82099e-15	5.70417e-08	1.41516e-07	9.87595e-08	6.98769e-07	2.36127e-09	9.74554e-08	1.49893e-08	1.16523e-08	4.11532e-11	1.08467e-14	5.70415e-08	2.25037e-07	9.87593e-08	6.98767e-07	8.83957e-09	0.01582	0.03883
Sum EC10 -Cu	8.1	0.84722	1.11938e-06	1.0357e-08	1.09016e-06	1.11938e-06	1.0357e-08	5.94772e-09	4.62039e-09	4.11264e-11	1.08034e-14	3.24303e-08	9.34132e-08	1.08161e-07	6.98796e-07	5.9356e-09	4.53595e-08	1.02604e-08	7.97061e-09	4.11263e-11	1.8637e-14	3.24303e-08	1.61147e-07	1.08161e-07	6.98795e-07	2.59954e-08	0.00731861	0.01879
Sum EC10 -Cu	8.1	0.84722	1.21426e-06	1.12406e-08	1.1831e-06	1.21426e-06	1.12406e-08	6.45461e-09	5.01455e-09	4.46349e-11	1.17251e-14	3.51969e-08	1.01382e-07	1.17388e-07	7.58351e-07	6.44096e-09	4.92292e-08	1.11348e-08	8.65058e-09	4.46348e-11	2.02269e-14	3.51968e-08	1.74894e-07	1.17388e-07	7.5835e-07	2.82087e-08	0.00718815	0.01848
Sum EC10 -Cu	8.1	0.84722	1.13539e-06	1.05068e-08	1.1059e-06	1.13539e-06	1.05068e-08	6.03355e-09	4.68719e-09	4.1721e-11	1.09597e-14	3.28992e-08	9.47638e-08	1.09725e-07	7.0888e-07	6.02109e-09	4.60154e-08	1.04084e-08	8.08585e-09	4.1721e-11	1.89065e-14	3.28992e-08	1.63477e-07	1.09725e-07	7.08879e-07	2.63699e-08	0.00727621	0.01869
Sum EC10 -Cu	8.2	1.0319	1.22659e-06	8.11863e-09	1.20297e-06	1.22659e-06	8.11863e-09	5.40452e-09	4.55958e-09	5.10937e-11	1.6897e-14	2.86672e-08	8.70121e-08	1.1972e-07	7.99388e-07	9.90905e-09	3.741e-08	9.58971e-09	8.09046e-09	5.10936e-11	2.99818e-14	2.86671e-08	1.54393e-07	1.1972e-07	7.99387e-07	4.56601e-08	0.00531305	0.01395
Sum EC10 -Cu	8.2	1.0319	1.23803e-06	8.19518e-09	1.2143e-06	1.23803e-06	8.19518e-09	5.45539e-09	4.60257e-09	5.15754e-11	1.70563e-14	2.89375e-08	8.78326e-08	1.20849e-07	8.06911e-07	1.00021e-08	3.77628e-08	9.67997e-09	8.16675e-09	5.15754e-11	3.02645e-14	2.89374e-08	1.55849e-07	1.20849e-07	8.0691e-07	4.60891e-08	0.00528574	0.01389
Sum EC10 -Cu	8.2	1.0319	1.23967e-06	8.20571e-09	1.21586e-06	1.23967e-06	8.20571e-09	5.46241e-09	4.60848e-09	5.16417e-11	1.70782e-14	2.89746e-08	8.79453e-08	1.21004e-07	8.0795e-07	1.0015e-08	3.78113e-08	9.69243e-09	8.17723e-09	5.16416e-11	3.03034e-14	2.89746e-08	1.56049e-07	1.21004e-07	8.07949e-07	4.61485e-08	0.00529702	0.01391
Sum EC50 -Cu	8.2	1.03189	1.11438e-06	7.38791e-09	1.09449e-06	1.11438e-06	7.38791e-09	4.91694e-09	4.14919e-09	4.64949e-11	1.53762e-14	2.60864e-08	7.9177e-08	1.08935e-07	7.27269e-07	9.01298e-09	3.40428e-08	8.72455e-09	7.36226e-09	4.64949e-11	2.72832e-14	2.60864e-08	1.4049e-07	1.08935e-07	7.27268e-07	4.1531e-08	0.0048707	0.01298
Sum EC50 -Cu	8.1	1.03191	1.13864e-06	8.86536e-09	1.11726e-06	1.13864e-06	8.86536e-09	5.92807e-09	3.95493e-09	3.52031e-11	9.24747e-15	3.13014e-08	9.50107e-08	1.30719e-07	6.96488e-07	6.88859e-09	4.0851e-08	1.05187e-08	7.01759e-09	3.52031e-11	1.64086e-14	3.13013e-08	1.68586e-07	1.30719e-07	6.96487e-07	3.17422e-08	0.00518377	0.01359
Sum EC50 -Cu	8.1	1.03191	1.14139e-06	8.88574e-09	1.11984e-06	1.14139e-06	8.88574e-09	5.94177e-09	3.96402e-09	3.5284e-11	9.26872e-15	3.13734e-08	9.52295e-08	1.31021e-07	6.98097e-07	6.90458e-09	4.09449e-08	1.0543e-08	7.03371e-09	3.5284e-11	1.64463e-14	3.13733e-08	1.68974e-07	1.31021e-07	6.98096e-07	3.18159e-08	0.00521514	0.01366
Sum EC50 -Cu	8.1	1.03191	1.10189e-06	8.5775e-09	1.08101e-06	1.10189e-06	8.5775e-09	5.73577e-09	3.82651e-09	3.406e-11	8.94719e-15	3.0285e-08	9.19261e-08	1.26476e-07	6.73894e-07	6.66535e-09	3.95246e-08	1.01775e-08	6.78972e-09	3.406e-11	1.58758e-14	3.0285e-08	1.63113e-07	1.26476e-07	6.73893e-07	3.07135e-08	0.00523511	0.01372
Sum EC20	7.7	0.28695	2.25063e-06	8.89469e-08	2.07045e-06	2.25063e-06	8.89469e-08	2.09567e-08	1.57969e-08	5.59777e-11	5.85406e-15	1.42102e-07	3.10361e-07	1.39025e-07	9.8022e-07	1.35993e-09	2.88696e-07	3.11492e-08	2.34799e-08	5.59775e-11	8.70124e-15	1.42102e-07	4.61308e-07	1.39025e-07	9.80217e-07	4.41393e-09	0.02381	0.05625
Sum EC20	7.7	0.28695	2.14712e-06	8.47603e-08	1.97305e-06	2.14712e-06	8.47603e-08	1.99714e-08	1.50534e-08	5.33429e-11	5.57852e-15	1.35414e-07	2.95752e-07	1.32481e-07	9.34134e-07	1.29606e-09	2.75107e-07	2.96847e-08	2.23747e-08	5.33427e-11	8.29168e-15	1.35413e-07	4.39594e-07	1.32481e-07	9.34131e-07	4.20664e-09	0.02412	0.05695
Sum EC20	7.7	0.28695	2.28633e-06	9.04104e-08	2.1045e-06	2.28633e-06	9.04104e-08	2.13011e-08	1.60569e-08	5.68988e-11	5.95038e-15	1.44441e-07	3.15467e-07	1.41313e-07	9.96328e-07	1.38225e-09	2.93446e-07	3.16611e-08	2.38663e-08	5.68986e-11	8.84441e-15	1.4444e-07	4.68898e-07	1.41312e-07	9.96325e-07	4.48637e-09	0.02366	0.05588
Sum EC20	7.9	0.47501	1.85766e-06	3.8095e-08	1.77317e-06	1.85766e-06	3.8095e-08	1.37775e-08	1.07229e-08	6.02216e-11	9.98147e-15	8.3468e-08	2.07085e-07	1.44518e-07	1.02134e-06	3.44724e-09	1.42612e-07	2.19088e-08	1.70514e-08	6.02215e-11	1.58725e-14	8.34678e-08	3.29306e-07	1.44518e-07	1.02134e-06	1.2905e-08	0.01312	0.03237
Sum EC20	7.9	0.47501	1.76385e-06	3.61505e-08	1.68276e-06	1.76385e-06	3.61505e-08	1.30755e-08	1.01755e-08	5.71476e-11	9.47197e-15	7.92076e-08	1.96515e-07	1.37141e-07	9.693e-07	3.27192e-09	1.35332e-07	2.07926e-08	1.6181e-08	5.71475e-11	1.50623e-14	7.92074e-08	3.12496e-07	1.37141e-07	9.69298e-07	1.22487e-08	0.01325	0.03273
Sum EC20	7.9	0.47501	1.81944e-06	3.73126e-08	1.73676e-06	1.81944e-06	3.73126e-08	1.34946e-08	1.05026e-08	5.89847e-11	9.77646e-15	8.17536e-08	2.02832e-07	1.4155e-07	1.00037e-06	3.3765e-09	1.39682e-07	2.14591e-08	1.67012e-08	5.89846e-11	1.55465e-14	8.17534e-08	3.22542e-07	1.41549e-07	1.00037e-06	1.26402e-08	0.0131	0.03234
Sum EC70	7.7	0.28503	2.29815e-06	9.2289e-08	2.13509e-06	2.29815e-06	9.2289e-08	2.1599e-08	1.63905e-08	5.8081e-11	6.07402e-15	1.46952e-07	3.2011e-07	1.42541e-07	1.01026e-06	1.39225e-09	2.98968e-07	3.20759e-08	2.4341e-08	5.80808e-11	9.02033e-15	1.46951e-07	4.75385e-07	1.4254e-07	1.01026e-06	4.51016e-09	0.02108	0.04988
Sum EC70	7.7	0.28503	2.23541e-06	8.97172e-08	2.07561e-06	2.23541e-06	8.97172e-08	2.09975e-08	1.59337e-08	5.64625e-11	5.90476e-15	1.42857e-07	3.11189e-07	1.38568e-07	9.82125e-07	1.3535e-09	2.90637e-07	3.11827e-08	2.36627e-08	5.64623e-11	8.76896e-15	1.42856e-07	4.62137e-07	1.38568e-07	9.82122e-07	4.38464e-09	0.02123	0.05025
Sum EC70	7.8	0.47502	1.97095e-06	4.63272e-08	1.88674e-06	1.97095e-06	4.63272e-08	1.66903e-08	1.03581e-08	4.62084e-11	6.08363e-15	1.01493e-07	2.51808e-07	1.75709e-07	9.82796e-07	2.62477e-09	1.7343e-07	2.65408e-08	1.64713e-08	4.62083e-11	9.67416e-15	1.01493e-07	4.00424e-07	1.75709e-07	9.82794e-07	9.82605e-09	0.01249	0.03023
Sum EC70	7.8	0.47502	1.99894e-06	4.69918e-08	1.91376e-06	1.99894e-06	4.69918e-08	1.6929e-08	1.05066e-08	4.68712e-11	6.1709e-15	1.02949e-07	2.5542e-07	1.78229e-07	9.96854e-07	2.6622e-09	1.75918e-07	2.69204e-08	1.67076e-08	4.68711e-11	9.81294e-15	1.02949e-07	4.06168e-07	1.78229e-07	9.96852e-07	9.9662e-09	0.01246	0.03015
Sum EC70	7.9	0.6617	1.86174e-06	2.89014e-08	1.80875e-06	1.86174e-06	2.89014e-08	1.36553e-08	8.13506e-09	4.56881e-11	7.5726e-15	7.77325e-08	2.09974e-07	1.9584e-07	1.01228e-06	4.46357e-09	1.1852e-07	2.2744e-08	1.35496e-08	4.5688e-11	1.26128e-14	7.77324e-08	3.49728e-07	1.9584e-07	1.01228e-06	1.83044e-08	0.00812537	0.02034
Sum EC70	7.9	0.6617	1.90684e-06	2.9608e-08	1.85291e-06	1.90684e-06	2.9608e-08	1.39884e-08	8.33396e-09	4.68051e-11	7.75775e-15	7.96329e-08	2.15107e-07	2.00628e-07	1.03697e-06	4.5722e-09	1.21418e-07	2.32988e-08	1.38809e-08	4.68051e-11	1.29211e-14	7.96327e-08	3.58278e-07	2.00628e-07	1.03697e-06	1.87499e-08	0.00807876	0.02021
Sum EC20	8.1	0.84722	1.67994e-06	1.56383e-08	1.64494e-06	1.67994e-06	1.56383e-08	8.97187e-09	6.97638e-09	6.20973e-11	1.63123e-14	4.89656e-08	1.41045e-07	1.63313e-07	1.0541e-06	8.94494e-09	6.84891e-08	1.54773e-08	1.20349e-08	6.20972e-11	2.81403e-14	4.89655e-08	2.43317e-07	1.63312e-07	1.0541e-06	3.91752e-08	0.00571796	0.01512
Sum EC20	8.1	0.84722	1.6918e-06	1.57487e-08	1.65656e-06	1.6918e-06	1.57487e-08	9.03524e-09	7.02565e-09	6.25358e-11	1.64275e-14	4.93114e-08	1.42041e-07	1.64466e-07	1.06155e-06	9.00814e-09	6.89728e-08	1.55867e-08	1.21199e-08	6.25357e-11	2.8339e-14	4.93113e-08	2.45035e-07	1.64466e-07	1.06155e-06	3.9452e-08	0.00571644	0.01512
Sum EC20	8.1	0.84722	1.67475e-06	1.559e-08	1.63986e-06	1.67475e-06	1.559e-08	8.94416e-09	6.95488e-09	6.19059e-11	1.6262e-14	4.88147e-08	1.40611e-07	1.62809e-07	1.05085e-06	8.91726e-09	6.8278e-08	1.54295e-08	1.19978e-08	6.19058e-11	2.80535e-14	4.88146e-08	2.42567e-07	1.62809e-07	1.05085e-06	3.9054e-08	0.00571534	0.01512
Sum EC20	8.2	1.0319	1.81141e-06	1.20442e-08	1.78355e-06	1.81141e-06	1.20442e-08	8.01126e-09	6.76423e-09	7.57985e-11	2.5067e-14	4.25275e-08	1.29084e-07	1.77606e-07	1.18495e-06	1.46766e-08	5.54986e-08	1.42151e-08	1.20024e-08	7.57984e-11	4.44786e-14	4.25274e-08	2.29045e-07	1.77606e-07	1.18495e-06	6.76287e-08	0.00413483	0.01125
Sum EC20	8.2	1.0319	1.81446e-06	1.20636e-08	1.78642e-06	1.81446e-06	1.20636e-08	8.02415e-09	6.77513e-09	7.59206e-11	2.51074e-14	4.2596e-08	1.29292e-07	1.77892e-07	1.18686e-06	1.47002e-08	5.5588e-08	1.4238e-08	1.20217e-08	7.59205e-11	4.45503e-14	4.25959e-08	2.29414e-07	1.77892e-07	1.18686e-06	6.77374e-08	0.00415888	0.0113
Sum EC20	8.2	1.0319	1.75993e-06	1.17006e-08	1.73272e-06	1.75993e-06	1.17006e-08	7.78297e-09	6.57131e-09	7.36367e-11	2.43521e-14	4.13146e-08	1.25402e-07	1.72541e-07	1.15119e-06	1.42587e-08	5.39157e-08	1.381e-08	1.16601e-08	7.36366e-11	4.32101e-14	4.13145e-08	2.22512e-07	1.72541e-07	1.15118e-06	6.57031e-08	0.00415851	0.01131
Sum EC70	8.1	1.03191	1.85001e-06	1.44753e-08	1.82285e-06	1.85001e-06	1.44753e-08	9.66868e-09	6.45756e-09	5.74792e-11	1.50992e-14	5.11061e-08	1.55129e-07	2.13427e-07	1.13597e-06	1.1223e-08	6.67012e-08	1.7156e-08	1.14582e-08	5.74792e-11	2.67918e-14	5.11061e-08	2.75259e-07	2.13427e-07	1.13597e-06	5.17148e-08	0.00400291	0.01068
Sum EC70	8.1	1.03192	1.89516e-06	1.48297e-08	1.86743e-06	1.89516e-06	1.48297e-08	9.905e-09	6.61567e-09	5.88866e-11	1.54689e-14	5.23573e-08	1.58927e-07	2.18652e-07	1.16374e-06	1.14968e-08	6.83344e-08	1.75753e-08	1.17388e-08	5.88865e-11	2.74478e-14	5.23573e-08	2.81999e-07	2.18652e-07	1.16373e-06	5.29766e-08	0.00399043	0.01064
Sum EC70	8.1	1.03192	1.82006e-06	1.42395e-08	1.79324e-06	1.82006e-06	1.42395e-08	9.51176e-09	6.3524e-09	5.65432e-11	1.48533e-14	5.0274e-08	1.52604e-07	2.09954e-07	1.11753e-06	1.10414e-08	6.5615e-08	1.68776e-08	1.12716e-08	5.65431e-11	2.63555e-14	5.02739e-08	2.70779e-07	2.09954e-07	1.11753e-06	5.08783e-08	0.00401631	0.01072
Sum EC70	8.1	1.03192	1.83905e-06	1.4388e-08	1.81194e-06	1.83905e-06	1.4388e-08	9.61094e-09	6.41862e-09	5.71326e-11	1.50081e-14	5.07981e-08	1.54194e-07	2.12143e-07	1.12919e-06	1.11566e-08	6.6299e-08	1.70536e-08	1.13891e-08	5.71325e-11	2.66303e-14	5.0798e-08	2.73601e-07	2.12143e-07	1.12919e-06	5.14091e-08	0.00401863	0.01073
Cu high	7.9	0.65052	0	0	0	0	-	-	-	-	-	-	-	-	-	-	-	-	-	-	-	-	-	-	-	-	0	0
Cu high	7.9	0.65423	0	0	0	0	-	-	-	-	-	-	-	-	-	-	-	-	-	-	-	-	-	-	-	-	0	0
Cu low	7.9	0.66168	0	0	0	0	-	-	-	-	-	-	-	-	-	-	-	-	-	-	-	-	-	-	-	-	0	0
Cu low	7.9	0.66168	0	0	0	0	-	-	-	-	-	-	-	-	-	-	-	-	-	-	-	-	-	-	-	-	0	0
Cu high	8	0.65422	0	0	0	0	-	-	-	-	-	-	-	-	-	-	-	-	-	-	-	-	-	-	-	-	0	0
Cu high	7.9	0.65423	0	0	0	0	-	-	-	-	-	-	-	-	-	-	-	-	-	-	-	-	-	-	-	-	0	0
Cu low	7.9	0.65423	0	0	0	0	-	-	-	-	-	-	-	-	-	-	-	-	-	-	-	-	-	-	-	-	0	0
Cu low	7.9	0.65423	0	0	0	0	-	-	-	-	-	-	-	-	-	-	-	-	-	-	-	-	-	-	-	-	0	0
Cu low	8	0.66168	0	0	0	0	-	-	-	-	-	-	-	-	-	-	-	-	-	-	-	-	-	-	-	-	0	0
Cu low	8	0.66168	0	0	0	0	-	-	-	-	-	-	-	-	-	-	-	-	-	-	-	-	-	-	-	-	0	0
Cu high	7.9	0.65423	0	0	0	0	-	-	-	-	-	-	-	-	-	-	-	-	-	-	-	-	-	-	-	-	0	0
Cu high	7.9	0.65423	0	0	0	0	-	-	-	-	-	-	-	-	-	-	-	-	-	-	-	-	-	-	-	-	0	0
Cu high	7.9	0.66168	0	0	0	0	-	-	-	-	-	-	-	-	-	-	-	-	-	-	-	-	-	-	-	-	0	0
Cu high	7.9	0.66168	0	0	0	0	-	-	-	-	-	-	-	-	-	-	-	-	-	-	-	-	-	-	-	-	0	0
Cu high	7.9	0.65423	0	0	0	0	-	-	-	-	-	-	-	-	-	-	-	-	-	-	-	-	-	-	-	-	0	0
Cu high	7.9	0.65423	0	0	0	0	-	-	-	-	-	-	-	-	-	-	-	-	-	-	-	-	-	-	-	-	0	0
Cu high	7.9	0.65423	0	0	0	0	-	-	-	-	-	-	-	-	-	-	-	-	-	-	-	-	-	-	-	-	0	0
Cu high	7.9	0.65423	0	0	0	0	-	-	-	-	-	-	-	-	-	-	-	-	-	-	-	-	-	-	-	-	0	0
Cu high	8	0.66168	0	0	0	0	-	-	-	-	-	-	-	-	-	-	-	-	-	-	-	-	-	-	-	-	0	0
Cu high	8	0.66168	0	0	0	0	-	-	-	-	-	-	-	-	-	-	-	-	-	-	-	-	-	-	-	-	0	0
Control	7.7	0.27931	0	0	0	0	-	-	-	-	-	-	-	-	-	-	-	-	-	-	-	-	-	-	-	-	0	0
Control	7.7	0.28315	0	0	0	0	-	-	-	-	-	-	-	-	-	-	-	-	-	-	-	-	-	-	-	-	0	0
Control	7.7	0.28499	0	0	0	0	-	-	-	-	-	-	-	-	-	-	-	-	-	-	-	-	-	-	-	-	0	0
Control	7.9	0.34166	0	0	0	0	-	-	-	-	-	-	-	-	-	-	-	-	-	-	-	-	-	-	-	-	0	0
Control	7.9	0.34166	0	0	0	0	-	-	-	-	-	-	-	-	-	-	-	-	-	-	-	-	-	-	-	-	0	0
Control	7.9	0.46939	0	0	0	0	-	-	-	-	-	-	-	-	-	-	-	-	-	-	-	-	-	-	-	-	0	0
Control	7.9	0.47692	0	0	0	0	-	-	-	-	-	-	-	-	-	-	-	-	-	-	-	-	-	-	-	-	0	0
Control	7.9	0.4731	0	0	0	0	-	-	-	-	-	-	-	-	-	-	-	-	-	-	-	-	-	-	-	-	0	0
Control	7.9	0.47499	0	0	0	0	-	-	-	-	-	-	-	-	-	-	-	-	-	-	-	-	-	-	-	-	0	0
Control	7.9	0.47499	0	0	0	0	-	-	-	-	-	-	-	-	-	-	-	-	-	-	-	-	-	-	-	-	0	0
Control	7.9	0.66168	0	0	0	0	-	-	-	-	-	-	-	-	-	-	-	-	-	-	-	-	-	-	-	-	0	0
Control	7.9	0.66168	0	0	0	0	-	-	-	-	-	-	-	-	-	-	-	-	-	-	-	-	-	-	-	-	0	0
Control	8.1	0.8472	0	0	0	0	-	-	-	-	-	-	-	-	-	-	-	-	-	-	-	-	-	-	-	-	0	0
Control	8.1	0.85095	0	0	0	0	-	-	-	-	-	-	-	-	-	-	-	-	-	-	-	-	-	-	-	-	0	0
Control	8.1	0.85274	0	0	0	0	-	-	-	-	-	-	-	-	-	-	-	-	-	-	-	-	-	-	-	-	0	0
Control	8.2	1.0356	0	0	0	0	-	-	-	-	-	-	-	-	-	-	-	-	-	-	-	-	-	-	-	-	0	0
Control	8.2	1.03926	0	0	0	0	-	-	-	-	-	-	-	-	-	-	-	-	-	-	-	-	-	-	-	-	0	0
Control	8.2	1.03739	0	0	0	0	-	-	-	-	-	-	-	-	-	-	-	-	-	-	-	-	-	-	-	-	0	0
Control	8.1	0.65422	0	0	0	0	-	-	-	-	-	-	-	-	-	-	-	-	-	-	-	-	-	-	-	-	0	0
Control	8.1	0.65422	0	0	0	0	-	-	-	-	-	-	-	-	-	-	-	-	-	-	-	-	-	-	-	-	0	0
Control	8.1	0.65422	0	0	0	0	-	-	-	-	-	-	-	-	-	-	-	-	-	-	-	-	-	-	-	-	0	0
Control	8.1	0.65422	0	0	0	0	-	-	-	-	-	-	-	-	-	-	-	-	-	-	-	-	-	-	-	-	0	0
Control	7.9	0.65793	0	0	0	0	-	-	-	-	-	-	-	-	-	-	-	-	-	-	-	-	-	-	-	-	0	0
Control	8	0.65792	0	0	0	0	-	-	-	-	-	-	-	-	-	-	-	-	-	-	-	-	-	-	-	-	0	0
Control	8	0.65422	0	0	0	0	-	-	-	-	-	-	-	-	-	-	-	-	-	-	-	-	-	-	-	-	0	0
Control	8	0.65422	0	0	0	0	-	-	-	-	-	-	-	-	-	-	-	-	-	-	-	-	-	-	-	-	0	0
Control	8	0.64864	0	0	0	0	-	-	-	-	-	-	-	-	-	-	-	-	-	-	-	-	-	-	-	-	0	0
Control	7.9	0.65612	0	0	0	0	-	-	-	-	-	-	-	-	-	-	-	-	-	-	-	-	-	-	-	-	0	0
Control	8	0.66168	0	0	0	0	-	-	-	-	-	-	-	-	-	-	-	-	-	-	-	-	-	-	-	-	0	0
Control	8	0.66168	0	0	0	0	-	-	-	-	-	-	-	-	-	-	-	-	-	-	-	-	-	-	-	-	0	0
